# Supplementary material for: Mesenchymal Stem Cell-Derived Exosomes Protect Trabecular Meshwork from Oxidative Stress
Source: Research Square preprint supplement (doi:10.21203/rs.3.rs-234332/v1), 2021-02-19
Supplement: Supplementary file 1 [file 06df3115d2321072aeabe64b.xlsx]

## Sheet: Sheet1
	Control	Exo+H2O2	PBS+H2O2
IL-1alpha	0.000934	0.001353	0.002763
	0.00094	0.001409	0.003027
	0.000974	0.001337	0.003152
IL-1beta	0.00848305	0.0110074	0.0138795
	0.00980592	0.0120647	0.0165036
	0.00776001	0.0130885	0.0158982
IL-6	0.021437	0.031635	0.034917
	0.02269	0.028596	0.036001
	0.024785	0.030501	0.034584
IL-8	0.002542	0.001979	0.010425
	0.002532	0.003926	0.008551
	0.00211	0.00416	0.008176
MMP-2	0.023799	0.029591	0.021832
	0.023615	0.027161	0.022673
	0.024618	0.028072	0.019317
MMP-3	0.000327619	0.000474832	0.000295865
	0.000344363	0.000446542	0.000315737
	0.000283113	0.000440807	0.000287353
