# Supplementary material for: Mesenchymal Stem Cell-Derived Exosomes Protect Trabecular Meshwork from Oxidative Stress
Source: Research Square preprint supplement (doi:10.21203/rs.3.rs-234332/v1), 2021-02-19
Supplement: Supplementary file 2 [file 0959e9a81e34df903f8a1064.xlsx]

## Sheet: Sheet1
Cell counting Kit-8
	PBS+H2O2(6h)	Exo+H2O2(6h)	Control
	0.687	0.989	1.042
	0.62	1.001	0.999
	0.598	0.989	1.014
	PBS+H2O2(12h)	Exo+H2O2(12h)	Control
	0.697	1.156	1.132
	0.648	0.91	1.101
	0.716	1.041	1.305
	PBS+H2O2(24h)	Exo+H2O2(24h)	Control
	0.407	0.822	1.202
	0.434	0.848	1.899
	0.418	0.851	1.39
