# Supplementary material for: Mesenchymal Stem Cell-Derived Exosomes Protect Trabecular Meshwork from Oxidative Stress
Source: Research Square preprint supplement (doi:10.21203/rs.3.rs-234332/v1), 2021-02-19
Supplement: Supplementary file 3 [file 2d0bdd5eecffff9c1bd7f701.xlsx]

## Sheet: rna_expression microRNA
st_rna_id	rna_id	gene_id	exp_exo_A	exp_exo_B	exp_exo_C	exp_control_A	exp_control_B	exp_control_C	read_count_exo_A	read_count_exo_B	read_count_exo_C	read_count_control_A	read_count_control_B	read_count_control_C	average_exp_exosome	average_exp_control	average_read_count_exosome	average_read_count_control
S9606_3	hsa-miR-140-5p	NA	4444	3797	1138	4749	3961	1785	4621	3903	1151	4944	4068	1817	3126.33	3498.33	3225	3609.67
S9606_2	hsa-miR-576-3p	NA	13	17	6	22	12	12	13	17	6	22	12	12	12	15.333	12	15.333
S9606_1342	hsa-miR-2682-5p	NA	30	67	2	28	12	15	30	67	2	28	12	15	33	18.333	33	18.333
S9606_1343	hsa-miR-656-5p	NA	31	28	9	49	23	8	31	28	9	49	23	8	22.667	26.667	22.667	26.667
S9606_4	hsa-miR-522-5p	NA	1	0	0	0	0	0	1	0	0	0	0	0	0.333	0	0.333	0
S9606_5	hsa-miR-133a-3p	NA	0	1	1	0	0	7	0	1	1	0	0	7	0.667	2.333	0.667	2.333
S9606_8	hsa-miR-4743-3p	NA	0	0	0	0	1	0	0	0	0	0	1	0	0	0.333	0	0.333
S9606_1346	hsa-miR-487a-3p	NA	3231	2938	381	4237	4023	618	3317	2999	384	4358	4158	623	2183.33	2959.33	2233.33	3046.33
S9606_1347	hsa-miR-30d-5p	NA	1655	1374	967	2276	1574	1886	1689	1394	976	2323	1589	1908	1332	1912	1353	1940
S9606_10	hsa-miR-5088-5p	NA	0	4	0	3	0	0	0	4	0	3	0	0	1.333	1	1.333	1
S9606_11	hsa-miR-4649-5p	NA	1	2	0	0	0	0	1	2	0	0	0	0	1	0	1	0
S9606_1349	hsa-miR-6827-3p	NA	1	0	0	0	0	0	1	0	0	0	0	0	0.333	0	0.333	0
S9606_12	hsa-miR-665	NA	140	86	5	75	55	4	141	88	5	75	55	4	77	44.667	78	44.667
S9606_13	hsa-miR-3622b-3p	NA	19	0	1	15	1	1	19	0	1	15	1	1	6.667	5.667	6.667	5.667
S9606_1353	hsa-miR-7108-5p	NA	5	7	0	12	8	2	5	7	0	12	8	2	4	7.333	4	7.333
S9606_16	hsa-miR-3622a-5p	NA	1	29	0	0	11	4	1	29	0	0	11	4	10	5	10	5
S9606_1356	hsa-miR-34b-5p	NA	28	13	0	16	15	0	28	13	0	16	15	0	13.667	10.333	13.667	10.333
S9606_17	hsa-miR-381-3p	NA	7126	8072	1411	7252	6509	2108	7545	8524	1431	7588	6786	2146	5536.33	5289.67	5833.33	5506.67
S9606_18	hsa-miR-4709-3p	NA	0	0	0	1	0	0	0	0	0	1	0	0	0	0.333	0	0.333
S9606_1357	hsa-miR-6786-3p	NA	0	0	0	1	1	2	0	0	0	1	1	2	0	1.333	0	1.333
S9606_21	hsa-miR-374b-3p	NA	120	79	15	117	71	32	121	79	15	117	72	32	71.333	73.333	71.667	73.667
S9606_20	hsa-miR-6738-5p	NA	1	0	0	0	1	0	1	0	0	0	1	0	0.333	0.333	0.333	0.333
S9606_1361	hsa-miR-17-5p	NA	293	296	147	353	477	216	293	297	148	354	478	217	245.333	348.667	246	349.667
S9606_1363	hsa-miR-6895-3p	NA	0	0	1	1	1	0	0	0	1	1	1	0	0.333	0.667	0.333	0.667
S9606_1364	hsa-miR-6873-5p	NA	0	0	1	1	0	0	0	0	1	1	0	0	0.333	0.333	0.333	0.333
S9606_1366	hsa-miR-3200-5p	NA	0	0	0	0	1	0	0	0	0	0	1	0	0	0.333	0	0.333
S9606_1368	hsa-miR-4730	NA	5	8	0	3	2	0	5	8	0	3	2	0	4.333	1.667	4.333	1.667
S9606_24	hsa-miR-548s	NA	1	1	0	0	0	1	1	1	0	0	0	1	0.667	0.333	0.667	0.333
S9606_1370	hsa-miR-6876-5p	NA	1	2	1	2	1	0	1	2	1	2	1	0	1.333	1	1.333	1
S9606_1371	hsa-miR-302b-3p	NA	580	427	234	488	523	419	587	431	237	493	526	427	413.667	476.667	418.333	482
S9606_1372	hsa-miR-92b-3p	NA	7424	9083	1824	9383	7670	1563	7888	9796	1848	10081	8108	1582	6110.33	6205.33	6510.67	6590.33
S9606_27	hsa-miR-3940-5p	NA	2	5	0	3	3	0	2	5	0	3	3	0	2.333	2	2.333	2
S9606_1374	hsa-miR-3680-5p	NA	1	0	1	0	0	0	1	0	1	0	0	0	0.667	0	0.667	0
S9606_28	hsa-miR-431-3p	NA	100	119	8	92	65	11	100	119	8	92	65	11	75.667	56	75.667	56
S9606_30	hsa-miR-103a-2-5p	NA	8	9	7	7	10	16	8	9	7	7	10	16	8	11	8	11
S9606_29	hsa-miR-6832-5p	NA	1	0	0	0	0	0	1	0	0	0	0	0	0.333	0	0.333	0
S9606_31	hsa-miR-6877-5p	NA	3	12	0	0	6	1	3	12	0	0	6	1	5	2.333	5	2.333
S9606_1378	hsa-miR-3187-3p	NA	166	214	28	215	266	54	166	214	28	216	268	54	136	178.333	136	179.333
S9606_34	hsa-miR-3155a	NA	0	0	0	1	0	0	0	0	0	1	0	0	0	0.333	0	0.333
S9606_1379	hsa-miR-758-5p	NA	0	0	0	0	2	0	0	0	0	0	2	0	0	0.667	0	0.667
S9606_33	hsa-miR-3682-5p	NA	1	1	1	0	1	1	1	1	1	0	1	1	1	0.667	1	0.667
S9606_1384	hsa-miR-4695-3p	NA	0	2	0	1	0	0	0	2	0	1	0	0	0.667	0.333	0.667	0.333
S9606_38	hsa-miR-6740-5p	NA	1	0	0	2	1	0	1	0	0	2	1	0	0.333	1	0.333	1
S9606_1383	hsa-miR-377-5p	NA	780	967	202	753	713	234	791	980	202	760	717	235	649.667	566.667	657.667	570.667
S9606_39	hsa-miR-450a-2-3p	NA	13	14	1	14	25	3	13	14	1	14	25	3	9.333	14	9.333	14
S9606_1387	hsa-miR-202-3p	NA	0	0	0	0	0	1	0	0	0	0	0	1	0	0.333	0	0.333
S9606_40	hsa-miR-6793-3p	NA	0	2	0	0	0	0	0	2	0	0	0	0	0.667	0	0.667	0
S9606_42	hsa-miR-3622a-3p	NA	2	1	0	0	1	0	2	1	0	0	1	0	1	0.333	1	0.333
S9606_41	hsa-miR-541-5p	NA	24	31	8	35	29	18	24	31	9	36	29	18	21	27.333	21.333	27.667
S9606_43	hsa-miR-6515-3p	NA	1	2	0	1	0	0	1	2	0	1	0	0	1	0.333	1	0.333
S9606_44	hsa-miR-1276	NA	0	0	0	0	3	0	0	0	0	0	3	0	0	1	0	1
S9606_46	hsa-miR-2276-3p	NA	2	3	1	1	2	1	2	3	1	1	2	1	2	1.333	2	1.333
S9606_1393	hsa-miR-615-5p	NA	0	1	3	0	0	0	0	1	3	0	0	0	1.333	0	1.333	0
S9606_47	hsa-miR-3120-3p	NA	111	153	73	157	132	392	112	154	73	158	132	392	112.333	227	113	227.333
S9606_48	hsa-miR-6780b-5p	NA	0	3	0	2	3	1	0	3	0	2	3	1	1	2	1	2
S9606_50	hsa-miR-1306-5p	NA	64	75	7	69	55	8	64	75	7	69	55	8	48.667	44	48.667	44
S9606_1394	hsa-miR-3677-3p	NA	1	4	0	0	0	0	1	4	0	0	0	0	1.667	0	1.667	0
S9606_1395	hsa-miR-138-1-3p	NA	0	5	0	0	1	0	0	5	0	0	1	0	1.667	0.333	1.667	0.333
S9606_1396	hsa-miR-4641	NA	0	0	0	2	0	0	0	0	0	2	0	0	0	0.667	0	0.667
S9606_52	hsa-miR-489-3p	NA	0	2	0	1	1	0	0	2	0	1	1	0	0.667	0.667	0.667	0.667
S9606_53	hsa-miR-23a-3p	NA	55840	56900	28173	56521	48345	31146	89392	89066	34813	87732	69621	39117	46971	45337.3	71090.3	65490
S9606_1397	hsa-miR-370-5p	NA	34	56	9	41	57	22	34	56	9	41	57	22	33	40	33	40
S9606_55	hsa-miR-675-3p	NA	5	2	1	0	1	2	5	2	1	0	1	2	2.667	1	2.667	1
S9606_54	hsa-miR-6796-5p	NA	4	7	0	4	6	1	4	7	0	4	6	1	3.667	3.667	3.667	3.667
S9606_56	hsa-miR-2110	NA	106	87	16	92	74	29	106	87	16	93	74	29	69.667	65	69.667	65.333
S9606_1402	hsa-miR-1237-5p	NA	0	3	0	0	2	0	0	3	0	0	2	0	1	0.667	1	0.667
S9606_1403	hsa-miR-4421	NA	0	1	0	0	1	1	0	1	0	0	1	1	0.333	0.667	0.333	0.667
S9606_58	hsa-miR-483-3p	NA	9	15	13	23	13	13	9	15	13	23	13	13	12.333	16.333	12.333	16.333
S9606_1404	hsa-miR-3195	NA	1	0	1	0	0	0	1	0	1	0	0	0	0.667	0	0.667	0
S9606_59	hsa-miR-4659a-3p	NA	2	0	0	1	3	3	2	0	0	1	3	3	0.667	2.333	0.667	2.333
S9606_1405	hsa-miR-193a-5p	NA	2155	2535	1300	2105	1750	1532	2189	2593	1315	2132	1775	1552	1996.67	1795.67	2032.33	1819.67
S9606_61	hsa-miR-146a-5p	NA	6664	5933	4049	8096	8584	9112	6979	6194	4167	8591	9115	9725	5548.67	8597.33	5780	9143.67
S9606_62	hsa-miR-1289	NA	1	0	1	0	0	0	1	0	1	0	0	0	0.667	0	0.667	0
S9606_63	hsa-miR-8485	NA	0	0	1	0	0	0	0	0	1	0	0	0	0.333	0	0.333	0
S9606_1408	hsa-miR-2278	NA	15	10	4	19	10	7	15	10	4	19	10	7	9.667	12	9.667	12
S9606_65	hsa-miR-425-3p	NA	200	219	56	194	251	61	201	221	56	195	251	61	158.333	168.667	159.333	169
S9606_66	hsa-miR-4474-3p	NA	1	1	0	2	2	0	1	1	0	2	2	0	0.667	1.333	0.667	1.333
S9606_1410	hsa-miR-1179	NA	2	1	0	0	1	0	2	1	0	0	1	0	1	0.333	1	0.333
S9606_69	hsa-let-7a-3p	NA	108	91	139	104	84	287	108	91	139	104	85	289	112.667	158.333	112.667	159.333
S9606_72	hsa-miR-3691-5p	NA	1	0	1	2	1	1	1	0	1	2	1	1	0.667	1.333	0.667	1.333
S9606_71	hsa-miR-4488	NA	597	1588	16108	544	996	2256	600	1607	18053	544	1002	2290	6097.67	1265.33	6753.33	1278.67
S9606_1414	hsa-miR-19b-1-5p	NA	9	4	5	12	10	4	9	4	5	12	10	4	6	8.667	6	8.667
S9606_73	hsa-miR-10527-5p	NA	33	50	13	49	32	12	33	50	13	49	32	12	32	31	32	31
S9606_1415	hsa-miR-500a-5p	NA	18	26	13	33	23	37	18	26	13	34	23	37	19	31	19	31.333
S9606_1416	hsa-miR-744-5p	NA	1434	2103	369	1882	1247	647	1451	2134	370	1915	1255	651	1302	1258.67	1318.33	1273.67
S9606_75	hsa-miR-532-3p	NA	81	120	59	524	230	175	81	121	59	526	231	175	86.667	309.667	87	310.667
S9606_76	hsa-miR-4747-5p	NA	5	0	0	2	7	1	5	0	0	2	7	1	1.667	3.333	1.667	3.333
S9606_77	hsa-miR-6813-3p	NA	0	0	0	0	2	2	0	0	0	0	2	2	0	1.333	0	1.333
S9606_1417	hsa-miR-26a-2-3p	NA	45	33	23	28	31	18	45	34	23	28	31	18	33.667	25.667	34	25.667
S9606_1418	hsa-miR-3605-3p	NA	65	122	8	80	82	25	65	123	8	81	82	26	65	62.333	65.333	63
S9606_1419	hsa-miR-34a-3p	NA	36	20	21	28	31	9	36	20	21	28	31	9	25.667	22.667	25.667	22.667
S9606_1420	hsa-miR-4677-3p	NA	7	4	3	4	3	0	7	4	3	4	3	0	4.667	2.333	4.667	2.333
S9606_1421	hsa-miR-758-3p	NA	925	1150	223	799	779	256	934	1156	223	803	782	256	766	611.333	771	613.667
S9606_78	hsa-miR-3150b-3p	NA	0	0	0	1	0	0	0	0	0	1	0	0	0	0.333	0	0.333
S9606_1423	hsa-miR-6732-5p	NA	2	3	1	1	0	0	2	3	1	1	0	0	2	0.333	2	0.333
S9606_79	hsa-miR-6858-5p	NA	0	1	0	0	0	0	0	1	0	0	0	0	0.333	0	0.333	0
S9606_1426	hsa-miR-598-5p	NA	0	1	1	0	0	0	0	1	1	0	0	0	0.667	0	0.667	0
S9606_1427	hsa-miR-548ar-3p	NA	1	1	0	0	0	1	1	1	0	0	0	1	0.667	0.333	0.667	0.333
S9606_1428	hsa-miR-4690-3p	NA	0	0	0	0	0	1	0	0	0	0	0	1	0	0.333	0	0.333
S9606_1429	hsa-miR-202-5p	NA	3	4	1	2	1	1	3	4	1	2	1	1	2.667	1.333	2.667	1.333
S9606_83	hsa-miR-4638-5p	NA	1	1	0	4	0	0	1	1	0	4	0	0	0.667	1.333	0.667	1.333
S9606_85	hsa-miR-6868-3p	NA	0	0	0	1	0	1	0	0	0	1	0	1	0	0.667	0	0.667
S9606_86	hsa-miR-101-5p	NA	0	0	0	0	1	1	0	0	0	0	1	1	0	0.667	0	0.667
S9606_1432	hsa-miR-6511a-5p	NA	0	1	0	3	0	0	0	1	0	3	0	0	0.333	1	0.333	1
S9606_88	hsa-miR-6771-3p	NA	0	0	0	0	1	0	0	0	0	0	1	0	0	0.333	0	0.333
S9606_1434	hsa-miR-4668-5p	NA	1	1	0	1	5	2	1	1	0	1	5	2	0.667	2.667	0.667	2.667
S9606_90	hsa-miR-6748-3p	NA	1	1	0	0	0	0	1	1	0	0	0	0	0.667	0	0.667	0
S9606_92	hsa-miR-4463	NA	0	1	1	0	2	0	0	1	1	0	2	0	0.667	0.667	0.667	0.667
S9606_94	hsa-miR-4763-5p	NA	0	1	0	0	0	0	0	1	0	0	0	0	0.333	0	0.333	0
S9606_1444	hsa-miR-518e-5p	NA	1	0	0	0	0	0	1	0	0	0	0	0	0.333	0	0.333	0
S9606_96	hsa-miR-579-5p	NA	10	13	2	10	7	4	10	13	2	10	7	4	8.333	7	8.333	7
S9606_97	hsa-miR-1306-3p	NA	4	4	0	6	6	6	4	4	0	6	6	6	2.667	6	2.667	6
S9606_1445	hsa-miR-205-5p	NA	0	1	0	0	0	0	0	1	0	0	0	0	0.333	0	0.333	0
S9606_101	hsa-miR-496	NA	4394	4901	598	4761	4820	368	4568	5073	602	4933	4978	370	3297.67	3316.33	3414.33	3427
S9606_102	hsa-miR-320c	NA	134	132	33	171	122	50	134	132	33	171	122	50	99.667	114.333	99.667	114.333
S9606_1447	hsa-miR-6836-5p	NA	1	0	0	2	0	0	1	0	0	2	0	0	0.333	0.667	0.333	0.667
S9606_103	hsa-miR-6818-3p	NA	0	0	0	1	0	0	0	0	0	1	0	0	0	0.333	0	0.333
S9606_1449	hsa-miR-6515-5p	NA	1	4	0	2	1	0	1	4	0	2	1	0	1.667	1	1.667	1
S9606_106	hsa-miR-6797-5p	NA	0	1	0	0	0	0	0	1	0	0	0	0	0.333	0	0.333	0
S9606_109	hsa-miR-4722-5p	NA	0	0	0	0	3	1	0	0	0	0	3	1	0	1.333	0	1.333
S9606_1452	hsa-miR-627-5p	NA	13	11	4	24	12	5	13	11	4	24	12	5	9.333	13.667	9.333	13.667
S9606_111	hsa-miR-424-3p	NA	1458	1974	285	1850	1313	661	1472	1999	286	1878	1329	667	1239	1274.67	1252.33	1291.33
S9606_115	hsa-miR-4799-5p	NA	0	1	0	0	0	0	0	1	0	0	0	0	0.333	0	0.333	0
S9606_116	hsa-miR-3074-5p	NA	22485	25051	8433	36708	18285	16963	26784	29884	8974	47941	20709	19117	18656.3	23985.3	21880.7	29255.7
S9606_1457	hsa-miR-210-5p	NA	30	59	3	39	98	22	30	59	3	39	99	22	30.667	53	30.667	53.333
S9606_1459	hsa-miR-4708-3p	NA	0	0	0	0	1	0	0	0	0	0	1	0	0	0.333	0	0.333
S9606_1461	hsa-miR-3173-5p	NA	12	13	0	14	12	7	12	13	0	14	12	7	8.333	11	8.333	11
S9606_1462	hsa-miR-4748	NA	4	10	0	2	2	1	4	10	0	2	2	1	4.667	1.667	4.667	1.667
S9606_1465	hsa-miR-223-3p	NA	1	0	369	0	0	1817	1	0	372	0	0	1835	123.333	605.667	124.333	611.667
S9606_1466	hsa-miR-142-5p	NA	0	0	121	0	0	446	0	0	121	0	0	449	40.333	148.667	40.333	149.667
S9606_121	hsa-miR-664b-5p	NA	0	2	0	6	2	1	0	2	0	6	2	1	0.667	3	0.667	3
S9606_1467	hsa-miR-6803-3p	NA	1	1	1	0	1	0	1	1	1	0	1	0	1	0.333	1	0.333
S9606_125	hsa-miR-302c-5p	NA	11	6	0	13	3	2	11	6	0	13	3	2	5.667	6	5.667	6
S9606_1468	hsa-miR-6511a-3p	NA	9	17	0	13	7	4	9	17	0	13	7	4	8.667	8	8.667	8
S9606_124	hsa-miR-4525	NA	1	1	0	3	1	0	1	1	0	3	1	0	0.667	1.333	0.667	1.333
S9606_123	hsa-miR-486-3p	NA	418	418	25	359	176	42	419	420	26	361	176	42	287	192.333	288.333	193
S9606_126	hsa-miR-449a	NA	133	146	85	129	97	100	133	148	85	130	97	100	121.333	108.667	122	109
S9606_128	hsa-miR-4765	NA	0	0	0	0	1	0	0	0	0	0	1	0	0	0.333	0	0.333
S9606_129	hsa-miR-3619-5p	NA	1	2	0	2	2	0	1	2	0	2	2	0	1	1.333	1	1.333
S9606_127	hsa-miR-5001-5p	NA	3	2	0	1	1	2	3	2	0	1	1	2	1.667	1.333	1.667	1.333
S9606_132	hsa-miR-487b-3p	NA	10044	10576	2872	11294	10117	4676	10847	11446	2924	12236	10802	4847	7830.67	8695.67	8405.67	9295
S9606_131	hsa-miR-7113-5p	NA	2	4	0	1	3	2	2	4	0	1	3	2	2	2	2	2
S9606_130	hsa-miR-766-3p	NA	141	208	39	232	172	121	142	210	39	232	172	124	129.333	175	130.333	176
S9606_1473	hsa-miR-4761-5p	NA	0	0	0	0	2	1	0	0	0	0	2	1	0	1	0	1
S9606_133	hsa-miR-330-3p	NA	110	123	54	151	126	85	112	124	54	152	126	86	95.667	120.667	96.667	121.333
S9606_1475	hsa-miR-186-3p	NA	0	1	0	0	0	0	0	1	0	0	0	0	0.333	0	0.333	0
S9606_137	hsa-miR-92b-5p	NA	431	557	30	477	464	52	431	558	30	479	465	52	339.333	331	339.667	332
S9606_1477	hsa-miR-6769b-3p	NA	1	0	0	0	0	0	1	0	0	0	0	0	0.333	0	0.333	0
S9606_138	hsa-miR-6829-3p	NA	5	1	0	2	2	1	5	1	0	2	2	1	2	1.667	2	1.667
S9606_139	hsa-miR-6766-3p	NA	3	2	0	2	6	1	3	2	0	2	6	1	1.667	3	1.667	3
S9606_1482	hsa-miR-1-3p	NA	2	3	12	4	0	21	2	3	12	4	0	21	5.667	8.333	5.667	8.333
S9606_1485	hsa-miR-3202	NA	0	0	0	1	0	0	0	0	0	1	0	0	0	0.333	0	0.333
S9606_1484	hsa-miR-200a-5p	NA	0	0	1	9	2	1	0	0	1	9	2	1	0.333	4	0.333	4
S9606_141	hsa-miR-4710	NA	2	5	0	4	3	0	2	5	0	4	3	0	2.333	2.333	2.333	2.333
S9606_1486	hsa-miR-943	NA	0	0	0	0	0	1	0	0	0	0	0	1	0	0.333	0	0.333
S9606_1491	hsa-miR-3149	NA	0	0	0	1	0	0	0	0	0	1	0	0	0	0.333	0	0.333
S9606_1490	hsa-let-7b-3p	NA	0	0	0	0	1	0	0	0	0	0	1	0	0	0.333	0	0.333
S9606_1493	hsa-miR-146b-3p	NA	0	0	1	0	0	0	0	0	1	0	0	0	0.333	0	0.333	0
S9606_1492	hsa-miR-6878-5p	NA	0	0	0	1	0	0	0	0	0	1	0	0	0	0.333	0	0.333
S9606_144	hsa-miR-10524-5p	NA	0	0	0	0	0	1	0	0	0	0	0	1	0	0.333	0	0.333
S9606_1494	hsa-miR-10399-3p	NA	2	1	4	0	2	7	2	1	4	0	2	7	2.333	3	2.333	3
S9606_145	hsa-miR-885-5p	NA	0	0	1	0	0	4	0	0	1	0	0	4	0.333	1.333	0.333	1.333
S9606_148	hsa-miR-1282	NA	0	0	1	0	0	0	0	0	1	0	0	0	0.333	0	0.333	0
S9606_147	hsa-miR-4715-3p	NA	0	0	0	0	0	1	0	0	0	0	0	1	0	0.333	0	0.333
S9606_149	hsa-miR-3124-5p	NA	2	1	0	0	1	0	2	1	0	0	1	0	1	0.333	1	0.333
S9606_150	hsa-miR-103a-1-5p	NA	0	0	0	2	3	1	0	0	0	2	3	1	0	2	0	2
S9606_1495	hsa-miR-4731-5p	NA	78	121	7	95	70	24	78	121	7	95	70	24	68.667	63	68.667	63
S9606_151	hsa-miR-4750-5p	NA	1	3	0	2	1	0	1	3	0	2	1	0	1.333	1	1.333	1
S9606_152	hsa-miR-191-3p	NA	42	36	10	29	34	3	42	36	10	29	34	3	29.333	22	29.333	22
S9606_1496	hsa-let-7g-3p	NA	9	14	5	10	7	5	9	14	5	10	7	5	9.333	7.333	9.333	7.333
S9606_1500	hsa-miR-302a-5p	NA	1	1	0	0	1	1	1	1	0	0	1	1	0.667	0.667	0.667	0.667
S9606_1499	hsa-miR-769-5p	NA	389	330	127	352	321	229	390	330	127	356	322	230	282	300.667	282.333	302.667
S9606_155	hsa-miR-3928-3p	NA	6	2	0	4	8	2	6	2	0	4	8	2	2.667	4.667	2.667	4.667
S9606_156	hsa-miR-6799-5p	NA	1	0	0	0	0	0	1	0	0	0	0	0	0.333	0	0.333	0
S9606_157	hsa-miR-20a-3p	NA	1	1	0	1	3	0	1	1	0	1	3	0	0.667	1.333	0.667	1.333
S9606_1502	hsa-miR-19a-3p	NA	17	33	13	26	26	31	17	33	13	26	26	32	21	27.667	21	28
S9606_1503	hsa-miR-381-5p	NA	135	72	26	113	75	40	135	72	27	113	75	40	77.667	76	78	76
S9606_159	hsa-miR-1915-3p	NA	0	0	0	1	0	0	0	0	0	1	0	0	0	0.333	0	0.333
S9606_1504	hsa-miR-6741-3p	NA	2	2	3	3	0	3	2	2	3	3	0	3	2.333	2	2.333	2
S9606_158	hsa-miR-6787-3p	NA	1	0	0	1	0	0	1	0	0	1	0	0	0.333	0.333	0.333	0.333
S9606_1505	hsa-miR-7155-5p	NA	0	1	0	0	0	0	0	1	0	0	0	0	0.333	0	0.333	0
S9606_1506	hsa-miR-6845-5p	NA	1	0	0	0	0	0	1	0	0	0	0	0	0.333	0	0.333	0
S9606_161	hsa-miR-32-5p	NA	758	687	106	681	783	255	765	691	107	684	790	256	517	573	521	576.667
S9606_164	hsa-miR-1301-3p	NA	253	266	24	283	213	14	256	267	24	283	215	14	181	170	182.333	170.667
S9606_1511	hsa-miR-4694-5p	NA	2	0	0	0	0	0	2	0	0	0	0	0	0.667	0	0.667	0
S9606_1512	hsa-miR-3677-5p	NA	2	3	0	0	1	0	2	3	0	0	1	0	1.667	0.333	1.667	0.333
S9606_168	hsa-miR-7112-3p	NA	0	0	0	0	2	2	0	0	0	0	2	2	0	1.333	0	1.333
S9606_1515	hsa-miR-668-3p	NA	69	33	9	101	84	9	69	33	9	101	84	9	37	64.667	37	64.667
S9606_169	hsa-miR-370-3p	NA	5389	6609	1099	8595	6781	2974	5584	6947	1104	9078	7090	3029	4365.67	6116.67	4545	6399
S9606_170	hsa-miR-574-3p	NA	13095	15740	2458	9572	10647	5092	14409	17575	2496	10150	11480	5270	10431	8437	11493.3	8966.67
S9606_1517	hsa-miR-3074-3p	NA	3	1	1	2	1	2	3	1	1	2	1	2	1.667	1.667	1.667	1.667
S9606_1519	hsa-miR-342-3p	NA	927	1135	399	1008	928	839	933	1151	402	1021	935	846	820.333	925	828.667	934
S9606_1518	hsa-miR-6716-3p	NA	1	0	1	1	0	0	1	0	1	1	0	0	0.667	0.333	0.667	0.333
S9606_173	hsa-miR-23a-5p	NA	83	122	17	113	103	15	83	122	17	113	103	15	74	77	74	77
S9606_174	hsa-miR-329-5p	NA	36	30	4	55	42	6	36	30	4	55	42	6	23.333	34.333	23.333	34.333
S9606_1521	hsa-miR-584-5p	NA	1439	1504	323	1607	1373	750	1458	1523	324	1629	1394	755	1088.67	1243.33	1101.67	1259.33
S9606_176	hsa-miR-4479	NA	1	6	1	3	4	1	1	6	1	3	4	1	2.667	2.667	2.667	2.667
S9606_178	hsa-miR-4326	NA	20	11	10	13	18	26	20	11	10	13	18	27	13.667	19	13.667	19.333
S9606_179	hsa-let-7b-5p	NA	60337	55400	22224	66122	55636	31319	101219	86649	26096	115474	85638	39596	45987	51025.7	71321.3	80236
S9606_1525	hsa-miR-542-5p	NA	1392	1824	240	1571	1237	398	1411	1852	241	1583	1252	400	1152	1068.67	1168	1078.33
S9606_1526	hsa-miR-1231	NA	0	0	0	0	1	0	0	0	0	0	1	0	0	0.333	0	0.333
S9606_1527	hsa-miR-19b-3p	NA	1154	1325	552	1272	1241	815	1167	1346	558	1292	1258	825	1010.33	1109.33	1023.67	1125
S9606_180	hsa-miR-6751-5p	NA	3	7	2	1	7	0	3	7	2	1	7	0	4	2.667	4	2.667
S9606_182	hsa-miR-6856-3p	NA	0	0	0	1	0	0	0	0	0	1	0	0	0	0.333	0	0.333
S9606_1529	hsa-miR-10396a-3p	NA	0	1	9	0	0	2	0	1	9	0	0	2	3.333	0.667	3.333	0.667
S9606_183	hsa-miR-6807-5p	NA	3	1	0	0	2	1	3	1	0	0	2	1	1.333	1	1.333	1
S9606_1530	hsa-miR-675-5p	NA	10	14	1	26	11	2	10	14	1	26	11	2	8.333	13	8.333	13
S9606_1531	hsa-miR-199a-5p	NA	17040	19637	4262	16588	15479	3542	19492	22517	4400	18644	17316	3627	13646.3	11869.7	15469.7	13195.7
S9606_184	hsa-miR-6735-5p	NA	3	5	0	3	3	1	3	5	0	3	3	1	2.667	2.333	2.667	2.333
S9606_1533	hsa-miR-4455	NA	0	1	0	0	0	1	0	1	0	0	0	1	0.333	0.333	0.333	0.333
S9606_186	hsa-miR-30a-5p	NA	541	522	184	672	458	358	543	527	187	677	460	360	415.667	496	419	499
S9606_1534	hsa-miR-3682-3p	NA	0	1	0	1	3	1	0	1	0	1	3	1	0.333	1.667	0.333	1.667
S9606_188	hsa-miR-6844	NA	2	1	0	1	0	0	2	1	0	1	0	0	1	0.333	1	0.333
S9606_191	hsa-miR-6880-5p	NA	0	0	0	1	0	0	0	0	0	1	0	0	0	0.333	0	0.333
S9606_192	hsa-miR-6805-3p	NA	0	0	0	0	1	0	0	0	0	0	1	0	0	0.333	0	0.333
S9606_1537	hsa-miR-6718-5p	NA	0	0	1	0	0	0	0	0	1	0	0	0	0.333	0	0.333	0
S9606_198	hsa-miR-4689	NA	1	1	0	2	1	0	1	1	0	2	1	0	0.667	1	0.667	1
S9606_199	hsa-miR-136-3p	NA	2699	2521	598	2739	2302	1055	2757	2554	603	2803	2340	1061	1939.33	2032	1971.33	2068
S9606_1539	hsa-miR-548ad-5p	NA	9	10	0	14	7	1	9	10	0	15	7	1	6.333	7.333	6.333	7.667
S9606_200	hsa-miR-519a-3p	NA	1	0	0	1	0	0	1	0	0	1	0	0	0.333	0.333	0.333	0.333
S9606_1540	hsa-miR-339-3p	NA	424	569	113	327	298	244	425	574	114	327	300	244	368.667	289.667	371	290.333
S9606_202	hsa-miR-5003-3p	NA	1	2	0	4	1	0	1	2	0	4	1	0	1	1.667	1	1.667
S9606_1543	hsa-miR-1246	NA	100	86	92	107	104	262	100	86	92	107	105	263	92.667	157.667	92.667	158.333
S9606_203	hsa-miR-576-5p	NA	352	296	128	309	311	209	355	299	129	312	312	211	258.667	276.333	261	278.333
S9606_1546	hsa-miR-129-1-3p	NA	0	0	1	0	0	0	0	0	1	0	0	0	0.333	0	0.333	0
S9606_205	hsa-miR-6762-3p	NA	0	1	1	0	1	1	0	1	1	0	1	1	0.667	0.667	0.667	0.667
S9606_1549	hsa-miR-3145-5p	NA	0	0	0	1	0	0	0	0	0	1	0	0	0	0.333	0	0.333
S9606_209	hsa-miR-4664-5p	NA	0	1	3	1	1	2	0	1	3	1	1	2	1.333	1.333	1.333	1.333
S9606_211	hsa-miR-3150a-5p	NA	3	0	0	2	1	0	3	0	0	2	1	0	1	1	1	1
S9606_210	hsa-miR-4436b-3p	NA	1	0	0	0	0	1	1	0	0	0	0	1	0.333	0.333	0.333	0.333
S9606_208	hsa-miR-6791-3p	NA	2	1	1	1	1	5	2	1	1	1	1	5	1.333	2.333	1.333	2.333
S9606_213	hsa-miR-338-5p	NA	3	0	3	8	2	15	3	0	3	8	2	15	2	8.333	2	8.333
S9606_1552	hsa-miR-582-5p	NA	13	13	15	17	8	17	13	13	15	17	8	17	13.667	14	13.667	14
S9606_215	hsa-miR-543	NA	4120	5324	891	5351	5636	1773	4256	5546	904	5578	5878	1817	3445	4253.33	3568.67	4424.33
S9606_1555	hsa-miR-766-5p	NA	11	16	1	9	10	1	11	16	1	9	10	1	9.333	6.667	9.333	6.667
S9606_216	hsa-miR-151b	NA	184	189	77	166	124	172	184	191	78	166	124	172	150	154	151	154
S9606_1556	hsa-miR-548ae-5p	NA	9	10	0	14	7	1	9	10	0	15	7	1	6.333	7.333	6.333	7.667
S9606_219	hsa-miR-4445-3p	NA	0	1	0	0	0	0	0	1	0	0	0	0	0.333	0	0.333	0
S9606_1558	hsa-miR-200c-3p	NA	153	124	57	157	120	112	153	124	57	158	120	113	111.333	129.667	111.333	130.333
S9606_220	hsa-miR-96-5p	NA	34	25	11	36	43	20	34	25	11	37	44	20	23.333	33	23.333	33.667
S9606_222	hsa-miR-887-3p	NA	617	729	199	816	765	245	620	743	204	826	768	248	515	608.667	522.333	614
S9606_224	hsa-miR-618	NA	44	43	18	41	38	9	44	43	18	42	38	9	35	29.333	35	29.667
S9606_228	hsa-miR-1228-3p	NA	12	24	1	26	16	8	12	24	1	26	16	8	12.333	16.667	12.333	16.667
S9606_1559	hsa-miR-4721	NA	0	0	0	0	2	0	0	0	0	0	2	0	0	0.667	0	0.667
S9606_1560	hsa-miR-6810-5p	NA	3	0	0	9	2	1	3	0	0	9	2	1	1	4	1	4
S9606_230	hsa-miR-491-5p	NA	48	70	5	68	66	11	48	70	5	68	66	11	41	48.333	41	48.333
S9606_232	hsa-miR-4685-3p	NA	10	8	1	12	11	7	10	8	1	12	11	7	6.333	10	6.333	10
S9606_1562	hsa-miR-4744	NA	0	0	0	1	0	0	0	0	0	1	0	0	0	0.333	0	0.333
S9606_234	hsa-miR-511-3p	NA	0	0	0	2	0	0	0	0	0	2	0	0	0	0.667	0	0.667
S9606_235	hsa-miR-4286	NA	13	23	22	67	53	179	13	23	22	68	53	180	19.333	99.667	19.333	100.333
S9606_1565	hsa-miR-17-3p	NA	5	9	10	16	11	23	5	9	10	16	11	23	8	16.667	8	16.667
S9606_236	hsa-miR-627-3p	NA	0	0	1	0	0	1	0	0	1	0	0	1	0.333	0.333	0.333	0.333
S9606_238	hsa-miR-124-5p	NA	1	2	0	0	1	1	1	2	0	0	1	1	1	0.667	1	0.667
S9606_1569	hsa-miR-10523-5p	NA	1	1	0	0	3	0	1	1	0	0	3	0	0.667	1	0.667	1
S9606_1571	hsa-miR-3200-3p	NA	6	14	9	11	19	24	6	14	9	11	19	25	9.667	18	9.667	18.333
S9606_1572	hsa-miR-320e	NA	0	0	0	0	1	0	0	0	0	0	1	0	0	0.333	0	0.333
S9606_241	hsa-miR-641	NA	20	29	3	27	30	2	20	29	3	27	30	2	17.333	19.667	17.333	19.667
S9606_1573	hsa-miR-4433a-5p	NA	0	0	0	0	0	2	0	0	0	0	0	2	0	0.667	0	0.667
S9606_242	hsa-miR-1285-3p	NA	14	16	2	11	19	4	14	16	2	11	19	4	10.667	11.333	10.667	11.333
S9606_243	hsa-miR-1193	NA	3	3	0	2	4	0	3	3	0	2	4	0	2	2	2	2
S9606_245	hsa-miR-30a-3p	NA	437	379	182	479	398	239	437	384	182	483	400	239	332.667	372	334.333	374
S9606_1577	hsa-miR-548d-3p	NA	2	0	0	0	0	1	2	0	0	0	0	1	0.667	0.333	0.667	0.333
S9606_248	hsa-miR-5006-5p	NA	0	0	0	2	0	0	0	0	0	2	0	0	0	0.667	0	0.667
S9606_249	hsa-miR-6733-3p	NA	0	0	0	1	0	0	0	0	0	1	0	0	0	0.333	0	0.333
S9606_1581	hsa-miR-10400-3p	NA	0	0	0	0	0	1	0	0	0	0	0	1	0	0.333	0	0.333
S9606_1583	hsa-miR-4717-5p	NA	0	1	0	1	0	0	0	1	0	1	0	0	0.333	0.333	0.333	0.333
S9606_1585	hsa-miR-3678-3p	NA	0	0	0	1	0	0	0	0	0	1	0	0	0	0.333	0	0.333
S9606_1586	hsa-miR-3194-5p	NA	0	0	0	0	0	1	0	0	0	0	0	1	0	0.333	0	0.333
S9606_252	hsa-miR-20b-5p	NA	0	0	0	0	1	11	0	0	0	0	1	11	0	4	0	4
S9606_1587	hsa-miR-605-3p	NA	3	5	0	1	2	1	3	5	0	1	2	1	2.667	1.333	2.667	1.333
S9606_1588	hsa-miR-4706	NA	0	0	0	0	2	0	0	0	0	0	2	0	0	0.667	0	0.667
S9606_254	hsa-miR-1260a	NA	16	12	3	7	5	1	16	12	3	7	5	1	10.333	4.333	10.333	4.333
S9606_1589	hsa-miR-4725-3p	NA	127	120	14	108	78	15	127	120	14	108	78	15	87	67	87	67
S9606_253	hsa-miR-5699-5p	NA	5	4	0	4	1	1	5	4	0	4	1	1	3	2	3	2
S9606_255	hsa-miR-5692c	NA	1	0	0	0	0	0	1	0	0	0	0	0	0.333	0	0.333	0
S9606_256	hsa-miR-3161	NA	0	0	1	0	0	0	0	0	1	0	0	0	0.333	0	0.333	0
S9606_1592	hsa-miR-503-3p	NA	37	76	10	34	41	14	37	76	10	34	41	14	41	29.667	41	29.667
S9606_1594	hsa-miR-1307-3p	NA	1978	2570	685	2577	2891	1131	2017	2631	690	2634	2946	1146	1744.33	2199.67	1779.33	2242
S9606_257	hsa-miR-92a-1-5p	NA	65	101	54	66	78	93	65	101	54	66	78	95	73.333	79	73.333	79.667
S9606_1596	hsa-miR-376a-3p	NA	6564	7028	1589	7477	8611	1642	6878	7377	1608	7894	9124	1662	5060.33	5910	5287.67	6226.67
S9606_259	hsa-miR-548h-3p	NA	2	5	0	0	2	1	2	5	0	0	2	1	2.333	1	2.333	1
S9606_1597	hsa-miR-5000-5p	NA	2	3	1	3	3	2	2	3	1	3	3	2	2	2.667	2	2.667
S9606_1598	hsa-miR-3065-5p	NA	4	5	4	17	3	11	4	5	4	17	3	11	4.333	10.333	4.333	10.333
S9606_1599	hsa-miR-6822-3p	NA	0	0	0	0	0	1	0	0	0	0	0	1	0	0.333	0	0.333
S9606_1601	hsa-miR-217-3p	NA	2	4	1	2	1	0	2	4	1	2	1	0	2.333	1	2.333	1
S9606_1602	hsa-miR-125b-2-3p	NA	3	0	0	7	0	1	3	0	0	7	0	1	1	2.667	1	2.667
S9606_262	hsa-miR-3680-3p	NA	2	0	0	0	0	0	2	0	0	0	0	0	0.667	0	0.667	0
S9606_1603	hsa-miR-548am-5p	NA	0	1	0	0	1	0	0	1	0	0	1	0	0.333	0.333	0.333	0.333
S9606_1604	hsa-miR-323b-3p	NA	5	13	1	10	9	7	5	13	1	10	9	7	6.333	8.667	6.333	8.667
S9606_265	hsa-miR-4784	NA	0	1	0	0	0	0	0	1	0	0	0	0	0.333	0	0.333	0
S9606_267	hsa-miR-1273c	NA	8	11	1	7	10	2	8	11	1	7	10	2	6.667	6.333	6.667	6.333
S9606_266	hsa-miR-2682-3p	NA	1	1	1	1	0	0	1	1	1	1	0	0	1	0.333	1	0.333
S9606_269	hsa-miR-5690	NA	2	0	0	2	0	0	2	0	0	2	0	0	0.667	0.667	0.667	0.667
S9606_1605	hsa-miR-4489	NA	0	2	0	0	0	2	0	2	0	0	0	2	0.667	0.667	0.667	0.667
S9606_1606	hsa-miR-6862-3p	NA	0	0	1	0	0	0	0	0	1	0	0	0	0.333	0	0.333	0
S9606_272	hsa-miR-891a-5p	NA	0	0	0	3	0	1	0	0	0	3	0	1	0	1.333	0	1.333
S9606_275	hsa-miR-183-3p	NA	0	0	0	0	1	0	0	0	0	0	1	0	0	0.333	0	0.333
S9606_1607	hsa-miR-194-3p	NA	1	1	0	5	0	0	1	1	0	5	0	0	0.667	1.667	0.667	1.667
S9606_1609	hsa-miR-223-5p	NA	0	0	1	0	0	8	0	0	1	0	0	8	0.333	2.667	0.333	2.667
S9606_277	hsa-miR-4640-3p	NA	2	2	0	0	0	0	2	2	0	0	0	0	1.333	0	1.333	0
S9606_279	hsa-miR-106b-5p	NA	166	174	60	422	344	109	166	175	60	426	344	109	133.333	291.667	133.667	293
S9606_1613	hsa-miR-1914-3p	NA	0	3	0	0	0	0	0	3	0	0	0	0	1	0	1	0
S9606_281	hsa-miR-379-5p	NA	30781	32003	8720	35344	28576	14095	39155	40352	9266	45533	35070	15494	23834.7	26005	29591	32032.3
S9606_283	hsa-miR-3126-5p	NA	12	19	1	13	16	2	12	19	1	13	16	2	10.667	10.333	10.667	10.333
S9606_1617	hsa-miR-149-3p	NA	1	0	0	1	2	0	1	0	0	1	2	0	0.333	1	0.333	1
S9606_1618	hsa-miR-26b-5p	NA	4132	3184	2102	4736	3192	3821	4277	3253	2134	4897	3248	3924	3139.33	3916.33	3221.33	4023
S9606_285	hsa-miR-1255b-5p	NA	0	0	0	0	2	0	0	0	0	0	2	0	0	0.667	0	0.667
S9606_1624	hsa-miR-573	NA	0	2	0	2	0	0	0	2	0	2	0	0	0.667	0.667	0.667	0.667
S9606_1622	hsa-miR-1236-3p	NA	1	0	0	0	0	1	2	0	0	0	0	1	0.333	0.333	0.667	0.333
S9606_288	hsa-miR-6812-3p	NA	1	0	0	0	1	0	1	0	0	0	1	0	0.333	0.333	0.333	0.333
S9606_290	hsa-let-7g-5p	NA	32170	23151	16461	33512	27603	23103	40932	27294	18560	42848	33416	27193	23927.3	28072.7	28928.7	34485.7
S9606_1628	hsa-miR-660-3p	NA	0	0	0	0	0	2	0	0	0	0	0	2	0	0.667	0	0.667
S9606_293	hsa-miR-4645-5p	NA	1	0	0	0	0	0	1	0	0	0	0	0	0.333	0	0.333	0
S9606_292	hsa-miR-4731-3p	NA	9	11	0	7	3	1	9	11	0	7	3	1	6.667	3.667	6.667	3.667
S9606_1633	hsa-miR-765	NA	0	2	0	0	2	0	0	2	0	0	2	0	0.667	0.667	0.667	0.667
S9606_1635	hsa-miR-628-3p	NA	21	16	9	20	9	23	21	16	9	20	9	23	15.333	17.333	15.333	17.333
S9606_1634	hsa-miR-12135	NA	1	1	0	0	0	0	1	1	0	0	0	0	0.667	0	0.667	0
S9606_1636	hsa-miR-3131	NA	0	0	0	0	1	0	0	0	0	0	1	0	0	0.333	0	0.333
S9606_1637	hsa-miR-532-5p	NA	4364	5423	1007	4664	4023	2102	4514	5628	1014	4822	4147	2127	3598	3596.33	3718.67	3698.67
S9606_1638	hsa-miR-296-5p	NA	705	1171	239	1102	807	462	708	1182	240	1110	809	467	705	790.333	710	795.333
S9606_297	hsa-miR-197-5p	NA	18	24	0	24	30	3	18	24	0	24	30	3	14	19	14	19
S9606_1639	hsa-miR-378a-5p	NA	53	52	23	36	53	14	53	53	23	36	53	14	42.667	34.333	43	34.333
S9606_298	hsa-miR-34b-3p	NA	69	74	20	75	54	66	69	74	20	75	54	67	54.333	65	54.333	65.333
S9606_1643	hsa-miR-20a-5p	NA	605	593	171	628	710	293	607	598	171	629	717	295	456.333	543.667	458.667	547
S9606_303	hsa-miR-494-5p	NA	32	28	7	28	22	18	32	28	7	28	22	18	22.333	22.667	22.333	22.667
S9606_304	hsa-miR-106a-5p	NA	2	0	0	0	0	2	2	0	0	0	0	2	0.667	0.667	0.667	0.667
S9606_1649	hsa-miR-4654	NA	0	0	0	0	1	0	0	0	0	0	1	0	0	0.333	0	0.333
S9606_1648	hsa-miR-21-3p	NA	2218	2762	221	1557	1720	408	2264	2822	221	1574	1741	410	1733.67	1228.33	1769	1241.67
S9606_305	hsa-miR-4714-5p	NA	1	0	0	1	0	0	1	0	0	1	0	0	0.333	0.333	0.333	0.333
S9606_1647	hsa-miR-188-3p	NA	4	3	0	10	4	0	4	3	0	10	4	0	2.333	4.667	2.333	4.667
S9606_1650	hsa-miR-6859-5p	NA	0	0	0	1	2	0	0	0	0	1	2	0	0	1	0	1
S9606_1651	hsa-miR-550b-2-5p	NA	0	1	1	0	0	0	0	1	1	0	0	0	0.667	0	0.667	0
S9606_1653	hsa-miR-4527	NA	0	1	0	0	0	0	0	1	0	0	0	0	0.333	0	0.333	0
S9606_1655	hsa-miR-2355-3p	NA	22	10	2	17	15	7	22	10	2	17	15	7	11.333	13	11.333	13
S9606_1656	hsa-miR-148b-3p	NA	242	248	79	308	191	111	245	249	81	315	191	112	189.667	203.333	191.667	206
S9606_1658	hsa-miR-590-3p	NA	1621	1087	621	1657	1242	905	1647	1091	626	1675	1250	910	1109.67	1268	1121.33	1278.33
S9606_1660	hsa-miR-548u	NA	0	0	0	1	1	0	0	0	0	1	1	0	0	0.667	0	0.667
S9606_1659	hsa-miR-100-5p	NA	127280	135146	83344	134797	130136	111764	656465	758248	180410	704223	611903	365744	115257	125566	531708	560623
S9606_308	hsa-miR-5697	NA	1	1	0	0	0	0	1	1	0	0	0	0	0.667	0	0.667	0
S9606_1662	hsa-miR-6837-3p	NA	0	0	0	1	0	0	0	0	0	1	0	0	0	0.333	0	0.333
S9606_313	hsa-miR-6801-5p	NA	4	4	0	3	1	1	4	4	0	3	1	1	2.667	1.667	2.667	1.667
S9606_315	hsa-miR-3661	NA	21	18	7	22	30	7	21	18	7	22	30	7	15.333	19.667	15.333	19.667
S9606_1666	hsa-miR-320a-3p	NA	7508	7917	3993	9647	7865	4150	7974	8389	4122	10307	8284	4265	6472.67	7220.67	6828.33	7618.67
S9606_316	hsa-miR-4791	NA	9	6	3	8	3	8	9	6	3	8	3	8	6	6.333	6	6.333
S9606_317	hsa-miR-4638-3p	NA	4	3	2	2	2	1	4	3	2	2	2	1	3	1.667	3	1.667
S9606_318	hsa-miR-214-5p	NA	308	378	211	283	285	287	310	381	213	284	285	287	299	285	301.333	285.333
S9606_1667	hsa-miR-6808-3p	NA	0	0	0	0	0	1	0	0	0	0	0	1	0	0.333	0	0.333
S9606_320	hsa-miR-6500-3p	NA	31	37	5	39	37	6	31	37	5	39	37	6	24.333	27.333	24.333	27.333
S9606_321	hsa-miR-1296-5p	NA	805	1065	95	689	636	62	818	1073	95	692	641	62	655	462.333	662	465
S9606_1669	hsa-miR-6743-3p	NA	1	1	1	3	1	2	1	1	1	3	1	2	1	2	1	2
S9606_1671	hsa-miR-511-5p	NA	1	0	1	2	1	0	1	0	1	2	1	0	0.667	1	0.667	1
S9606_323	hsa-miR-6892-5p	NA	2	11	1	5	0	1	2	11	1	5	0	1	4.667	2	4.667	2
S9606_1672	hsa-miR-301a-3p	NA	598	651	120	621	647	142	607	663	123	631	657	144	456.333	470	464.333	477.333
S9606_324	hsa-miR-328-3p	NA	596	752	241	839	584	527	601	757	241	843	585	527	529.667	650	533	651.667
S9606_327	hsa-miR-3912-3p	NA	13	6	2	6	9	5	13	6	2	6	9	5	7	6.667	7	6.667
S9606_331	hsa-miR-10522-5p	NA	0	0	0	1	1	0	0	0	0	1	1	0	0	0.667	0	0.667
S9606_333	hsa-miR-495-5p	NA	616	707	257	732	617	570	620	710	260	736	621	579	526.667	639.667	530	645.333
S9606_1675	hsa-miR-152-3p	NA	3470	4220	972	6286	2470	1628	3571	4398	984	6599	2507	1663	2887.33	3461.33	2984.33	3589.67
S9606_335	hsa-miR-141-5p	NA	0	1	0	0	1	1	0	1	0	0	1	1	0.333	0.667	0.333	0.667
S9606_337	hsa-miR-4484	NA	12	9	0	18	19	0	12	9	0	18	19	0	7	12.333	7	12.333
S9606_336	hsa-miR-643	NA	1	0	0	1	7	1	1	0	0	1	7	1	0.333	3	0.333	3
S9606_338	hsa-miR-4676-3p	NA	0	0	0	0	1	0	0	0	0	0	1	0	0	0.333	0	0.333
S9606_1676	hsa-miR-361-5p	NA	1959	1532	799	1903	1693	748	1983	1554	803	1931	1718	754	1430	1448	1446.67	1467.67
S9606_342	hsa-miR-1908-5p	NA	265	250	15	215	141	28	266	251	15	215	141	28	176.667	128	177.333	128
S9606_343	hsa-miR-2277-3p	NA	13	15	7	5	6	12	13	15	7	5	6	12	11.667	7.667	11.667	7.667
S9606_1679	hsa-miR-6757-3p	NA	1	0	1	1	2	1	1	0	1	1	2	1	0.667	1.333	0.667	1.333
S9606_1680	hsa-miR-6871-5p	NA	6	2	0	0	1	0	6	2	0	0	1	0	2.667	0.333	2.667	0.333
S9606_345	hsa-miR-551b-3p	NA	0	0	2	0	0	6	0	0	2	0	0	6	0.667	2	0.667	2
S9606_1681	hsa-miR-656-3p	NA	2707	1967	952	2719	2036	1219	2765	2000	959	2764	2057	1230	1875.33	1991.33	1908	2017
S9606_348	hsa-miR-548ae-3p	NA	0	0	0	3	0	0	0	0	0	3	0	0	0	1	0	1
S9606_1682	hsa-miR-4728-5p	NA	3	0	0	0	0	1	3	0	0	0	0	1	1	0.333	1	0.333
S9606_350	hsa-miR-378i	NA	0	0	0	0	1	0	0	0	0	0	1	0	0	0.333	0	0.333
S9606_352	hsa-miR-323b-5p	NA	37	31	7	60	45	44	37	31	7	60	45	44	25	49.667	25	49.667
S9606_1684	hsa-miR-4717-3p	NA	7	7	2	4	2	0	7	8	3	4	2	0	5.333	2	6	2
S9606_353	hsa-miR-375-3p	NA	5	3	11	2	3	11	5	3	11	2	3	11	6.333	5.333	6.333	5.333
S9606_357	hsa-miR-6514-5p	NA	1	2	0	6	4	0	1	2	0	6	4	0	1	3.333	1	3.333
S9606_356	hsa-miR-770-5p	NA	46	31	13	39	48	19	46	31	14	40	48	19	30	35.333	30.333	35.667
S9606_358	hsa-miR-3615	NA	196	178	35	139	166	237	196	180	35	139	166	237	136.333	180.667	137	180.667
S9606_1692	hsa-miR-509-3p	NA	0	1	0	0	0	1	0	1	0	0	0	1	0.333	0.333	0.333	0.333
S9606_360	hsa-miR-4508	NA	0	0	2	0	0	1	0	0	2	0	0	1	0.667	0.333	0.667	0.333
S9606_1694	hsa-miR-6729-5p	NA	1	0	0	1	0	0	1	0	0	1	0	0	0.333	0.333	0.333	0.333
S9606_1697	hsa-miR-4782-5p	NA	0	1	0	0	1	0	0	1	0	0	1	0	0.333	0.333	0.333	0.333
S9606_1698	hsa-miR-708-3p	NA	0	0	1	0	0	0	0	0	1	0	0	0	0.333	0	0.333	0
S9606_363	hsa-miR-4521	NA	1101	1016	644	1262	856	758	1117	1023	658	1282	863	764	920.333	958.667	932.667	969.667
S9606_1700	hsa-let-7i-5p	NA	73011	67275	34558	77960	69189	49763	139365	118044	44920	153761	121075	73728	58281.3	65637.3	100776	116188
S9606_364	hsa-miR-33a-5p	NA	1988	1969	211	1629	1039	461	2025	1996	212	1656	1050	463	1389.33	1043	1411	1056.33
S9606_365	hsa-miR-1287-5p	NA	118	147	25	105	121	31	119	147	25	106	121	31	96.667	85.667	97	86
S9606_367	hsa-miR-154-5p	NA	5146	5609	2548	5217	4215	4648	5347	5846	2604	5429	4338	4810	4434.33	4693.33	4599	4859
S9606_370	hsa-miR-449b-3p	NA	3	3	0	0	2	1	3	3	0	0	2	1	2	1	2	1
S9606_1706	hsa-miR-4802-5p	NA	1	2	0	0	1	0	1	2	0	0	1	0	1	0.333	1	0.333
S9606_374	hsa-miR-6817-3p	NA	2	3	0	1	1	1	2	3	0	1	1	1	1.667	1	1.667	1
S9606_375	hsa-miR-1226-3p	NA	21	20	4	19	12	14	21	20	4	19	12	14	15	15	15	15
S9606_376	hsa-miR-127-3p	NA	75349	89804	37406	89625	75721	62672	153874	211681	49852	205383	144976	104900	67519.7	76006	138469	151753
S9606_1709	hsa-miR-654-3p	NA	1482	1531	307	1272	1103	497	1499	1560	309	1288	1113	498	1106.67	957.333	1122.67	966.333
S9606_378	hsa-miR-23b-3p	NA	11956	11345	4550	11991	10548	1330	13100	12284	4711	13024	11369	1353	9283.67	7956.33	10031.7	8582
S9606_380	hsa-miR-3613-5p	NA	2084	1771	561	2090	1605	617	2122	1794	566	2131	1622	621	1472	1437.33	1494	1458
S9606_1711	hsa-miR-429	NA	30	33	8	28	17	25	30	33	8	28	17	25	23.667	23.333	23.667	23.333
S9606_381	hsa-miR-3614-5p	NA	1	0	0	0	0	2	1	0	0	0	0	2	0.333	0.667	0.333	0.667
S9606_1712	hsa-miR-584-3p	NA	13	25	4	27	16	7	13	25	4	27	16	7	14	16.667	14	16.667
S9606_383	hsa-miR-6779-3p	NA	0	0	0	1	0	0	0	0	0	1	0	0	0	0.333	0	0.333
S9606_1714	hsa-miR-508-3p	NA	0	0	1	0	2	1	0	0	1	0	2	1	0.333	1	0.333	1
S9606_1713	hsa-miR-4655-5p	NA	2	1	1	2	1	1	2	1	1	2	1	1	1.333	1.333	1.333	1.333
S9606_1717	hsa-miR-6837-5p	NA	1	2	0	2	1	0	1	2	0	2	1	0	1	1	1	1
S9606_1718	hsa-miR-200b-5p	NA	1	0	2	3	1	1	1	0	2	3	1	1	1	1.667	1	1.667
S9606_1719	hsa-miR-6801-3p	NA	0	2	0	2	0	0	0	2	0	2	0	0	0.667	0.667	0.667	0.667
S9606_1720	hsa-miR-3157-3p	NA	0	1	0	2	1	1	0	1	0	2	1	1	0.333	1.333	0.333	1.333
S9606_386	hsa-miR-98-3p	NA	0	1	1	1	1	0	0	1	1	1	1	0	0.667	0.667	0.667	0.667
S9606_1721	hsa-miR-548d-5p	NA	2	2	1	2	3	2	2	2	1	2	3	2	1.667	2.333	1.667	2.333
S9606_1723	hsa-miR-324-5p	NA	141	188	62	166	110	288	141	189	62	166	110	288	130.333	188	130.667	188
S9606_1724	hsa-miR-26a-1-3p	NA	56	51	16	53	54	28	57	51	16	53	54	29	41	45	41.333	45.333
S9606_1727	hsa-miR-6743-5p	NA	1	0	0	0	0	0	1	0	0	0	0	0	0.333	0	0.333	0
S9606_1728	hsa-miR-6855-5p	NA	4	5	0	2	8	0	4	5	0	2	8	0	3	3.333	3	3.333
S9606_1729	hsa-miR-1294	NA	63	37	7	37	36	5	63	37	8	37	36	5	35.667	26	36	26
S9606_390	hsa-miR-6501-5p	NA	0	0	0	0	0	2	0	0	0	0	0	2	0	0.667	0	0.667
S9606_1732	hsa-miR-3157-5p	NA	5	5	3	7	4	6	5	5	3	7	4	6	4.333	5.667	4.333	5.667
S9606_1735	hsa-miR-122-3p	NA	0	1	0	0	0	0	0	1	0	0	0	0	0.333	0	0.333	0
S9606_1734	hsa-miR-154-3p	NA	2985	2416	1019	3066	3426	1740	3053	2454	1026	3132	3523	1756	2140	2744	2177.67	2803.67
S9606_1736	hsa-miR-1270	NA	15	16	3	7	12	4	15	16	3	7	12	4	11.333	7.667	11.333	7.667
S9606_1737	hsa-miR-769-3p	NA	235	280	55	268	252	135	238	281	57	270	253	135	190	218.333	192	219.333
S9606_1739	hsa-miR-143-3p	NA	86038	95045	28708	87298	82715	26613	201689	238852	35369	192211	171707	32180	69930.3	65542	158637	132033
S9606_1740	hsa-miR-6874-5p	NA	0	2	0	0	0	0	0	2	0	0	0	0	0.667	0	0.667	0
S9606_395	hsa-miR-4665-5p	NA	4	6	1	1	3	1	4	6	1	1	3	1	3.667	1.667	3.667	1.667
S9606_394	hsa-miR-4750-3p	NA	3	1	0	0	0	1	3	1	0	0	0	1	1.333	0.333	1.333	0.333
S9606_396	hsa-miR-302a-3p	NA	481	425	244	475	435	372	488	429	244	480	437	376	383.333	427.333	387	431
S9606_1743	hsa-miR-4677-5p	NA	3	6	1	4	1	4	3	6	1	4	1	4	3.333	3	3.333	3
S9606_1742	hsa-miR-10b-5p	NA	6	4	183	0	1	19	6	4	184	0	1	19	64.333	6.667	64.667	6.667
S9606_398	hsa-miR-148b-5p	NA	0	0	1	0	0	0	0	0	1	0	0	0	0.333	0	0.333	0
S9606_399	hsa-miR-3129-5p	NA	1	0	0	0	0	0	1	0	0	0	0	0	0.333	0	0.333	0
S9606_1744	hsa-miR-7705	NA	16	24	17	26	32	45	16	24	17	26	32	45	19	34.333	19	34.333
S9606_1746	hsa-miR-6755-5p	NA	0	0	1	2	0	0	0	0	1	2	0	0	0.333	0.667	0.333	0.667
S9606_402	hsa-miR-1843	NA	29	27	9	30	28	16	29	27	9	30	28	16	21.667	24.667	21.667	24.667
S9606_1748	hsa-miR-153-3p	NA	2	9	2	11	5	7	2	9	2	11	5	7	4.333	7.667	4.333	7.667
S9606_1749	hsa-miR-4454	NA	75	15	9	84	54	11	75	15	9	84	54	11	33	49.667	33	49.667
S9606_1751	hsa-miR-7110-3p	NA	0	0	0	0	0	1	0	0	0	0	0	1	0	0.333	0	0.333
S9606_404	hsa-miR-1343-5p	NA	27	57	3	44	32	2	27	57	3	44	32	2	29	26	29	26
S9606_1752	hsa-miR-423-3p	NA	32387	40014	5753	31621	28435	13916	41873	54052	6026	39534	35028	15360	26051.3	24657.3	33983.7	29974
S9606_1753	hsa-miR-331-5p	NA	25	20	5	23	24	3	25	20	5	23	24	3	16.667	16.667	16.667	16.667
S9606_405	hsa-miR-3960	NA	0	0	2	0	0	0	0	0	2	0	0	0	0.667	0	0.667	0
S9606_1754	hsa-miR-190a-3p	NA	1	1	0	1	1	2	1	1	0	1	1	2	0.667	1.333	0.667	1.333
S9606_1755	hsa-miR-610	NA	1	0	0	0	0	0	1	0	0	0	0	0	0.333	0	0.333	0
S9606_408	hsa-miR-31-5p	NA	22988	32995	9726	20357	19550	18136	27389	42035	10455	23342	22370	20623	21903	19347.7	26626.3	22111.7
S9606_1762	hsa-miR-6742-5p	NA	0	1	0	0	0	0	0	1	0	0	0	0	0.333	0	0.333	0
S9606_1761	hsa-miR-935	NA	1025	1412	336	1172	1042	550	1035	1432	336	1183	1049	555	924.333	921.333	934.333	929
S9606_409	hsa-miR-541-3p	NA	32	25	5	53	32	5	32	25	5	53	32	5	20.667	30	20.667	30
S9606_1765	hsa-miR-6774-3p	NA	0	0	0	0	0	1	0	0	0	0	0	1	0	0.333	0	0.333
S9606_1768	hsa-miR-150-3p	NA	0	0	1	0	0	1	0	0	1	0	0	1	0.333	0.333	0.333	0.333
S9606_1770	hsa-miR-548aq-5p	NA	2	2	0	2	1	0	2	2	0	2	1	0	1.333	1	1.333	1
S9606_1771	hsa-miR-3130-5p	NA	5	4	2	1	3	0	5	4	2	1	3	0	3.667	1.333	3.667	1.333
S9606_412	hsa-miR-126-5p	NA	123	134	218	152	108	739	124	134	219	153	108	740	158.333	333	159	333.667
S9606_1774	hsa-miR-497-3p	NA	1	0	0	2	0	0	1	0	0	2	0	0	0.333	0.667	0.333	0.667
S9606_413	hsa-miR-6770-3p	NA	1	1	1	2	2	0	1	1	1	3	2	0	1	1.333	1	1.667
S9606_1777	hsa-miR-6818-5p	NA	1	1	0	1	2	1	1	1	0	1	2	1	0.667	1.333	0.667	1.333
S9606_417	hsa-miR-3138	NA	7	0	1	2	2	0	7	0	1	2	2	0	2.667	1.333	2.667	1.333
S9606_418	hsa-miR-4662b	NA	0	0	0	0	1	0	0	0	0	0	1	0	0	0.333	0	0.333
S9606_419	hsa-miR-6881-3p	NA	1	0	0	2	1	0	1	0	0	2	1	0	0.333	1	0.333	1
S9606_1781	hsa-miR-6508-3p	NA	1	0	1	1	0	0	1	0	1	1	0	0	0.667	0.333	0.667	0.333
S9606_1782	hsa-miR-3181	NA	0	2	1	5	4	1	0	2	1	5	4	1	1	3.333	1	3.333
S9606_423	hsa-miR-6721-5p	NA	10	14	0	12	3	2	10	14	0	12	3	2	8	5.667	8	5.667
S9606_1784	hsa-miR-5193	NA	0	0	0	0	0	1	0	0	0	0	0	1	0	0.333	0	0.333
S9606_1787	hsa-miR-376b-3p	NA	14052	12820	926	11458	11638	1301	15727	14119	935	12354	12629	1304	9266	8132.33	10260.3	8762.33
S9606_1786	hsa-miR-6781-3p	NA	1	0	0	2	3	1	1	0	0	2	3	1	0.333	2	0.333	2
S9606_426	hsa-miR-139-3p	NA	3	4	5	8	7	8	3	4	5	8	7	8	4	7.667	4	7.667
S9606_428	hsa-miR-491-3p	NA	1	3	1	1	0	1	1	3	1	1	0	1	1.667	0.667	1.667	0.667
S9606_1790	hsa-miR-548e-5p	NA	1	0	1	0	2	1	1	0	1	0	2	1	0.667	1	0.667	1
S9606_1791	hsa-miR-651-5p	NA	32	24	3	24	26	6	32	25	3	24	26	6	19.667	18.667	20	18.667
S9606_434	hsa-miR-376c-3p	NA	62726	61112	14605	60317	57979	16854	108346	99635	16206	97119	91614	18893	46147.7	45050	74729	69208.7
S9606_436	hsa-miR-6826-3p	NA	1	4	1	1	0	2	1	4	1	1	0	2	2	1	2	1
S9606_1798	hsa-miR-4524a-3p	NA	1	3	7	0	4	3	1	3	7	0	4	3	3.667	2.333	3.667	2.333
S9606_438	hsa-miR-30b-5p	NA	2884	2551	1444	3024	2177	2468	2951	2598	1463	3094	2209	2511	2293	2556.33	2337.33	2604.67
S9606_440	hsa-miR-5687	NA	0	0	0	0	0	1	0	0	0	0	0	1	0	0.333	0	0.333
S9606_439	hsa-miR-9-3p	NA	8	2	2	13	7	10	8	2	2	13	7	10	4	10	4	10
S9606_1800	hsa-miR-362-3p	NA	5	8	5	6	3	11	5	8	5	6	3	11	6	6.667	6	6.667
S9606_441	hsa-miR-6858-3p	NA	0	5	0	3	0	0	0	5	0	3	0	0	1.667	1	1.667	1
S9606_1805	hsa-miR-3911	NA	2	1	0	8	1	1	2	1	0	8	1	1	1	3.333	1	3.333
S9606_1809	hsa-miR-4711-5p	NA	0	0	1	0	0	0	0	0	1	0	0	0	0.333	0	0.333	0
S9606_1813	hsa-miR-146b-5p	NA	241	246	169	211	202	558	242	247	169	213	202	562	218.667	323.667	219.333	325.667
S9606_1814	hsa-miR-6730-5p	NA	0	1	1	0	0	1	0	1	1	0	0	1	0.667	0.333	0.667	0.333
S9606_1816	hsa-miR-378a-3p	NA	2165	2327	1183	1946	1365	883	2207	2373	1205	1988	1378	891	1891.67	1398	1928.33	1419
S9606_1819	hsa-miR-4686	NA	0	0	0	0	1	0	0	0	0	0	1	0	0	0.333	0	0.333
S9606_1820	hsa-miR-133b	NA	0	0	2	0	0	0	0	0	2	0	0	0	0.667	0	0.667	0
S9606_447	hsa-miR-12133	NA	0	0	0	0	0	1	0	0	0	0	0	1	0	0.333	0	0.333
S9606_1823	hsa-miR-548ah-3p	NA	0	1	0	2	0	1	0	1	0	2	0	1	0.333	1	0.333	1
S9606_1824	hsa-miR-410-5p	NA	55	59	31	100	55	52	55	59	32	100	56	52	48.333	69	48.667	69.333
S9606_1825	hsa-miR-4728-3p	NA	3	4	5	6	7	3	3	4	5	6	7	3	4	5.333	4	5.333
S9606_449	hsa-miR-3191-3p	NA	3	3	0	2	3	0	3	3	0	2	3	0	2	1.667	2	1.667
S9606_1829	hsa-miR-548q	NA	5	1	0	3	2	1	5	1	0	3	2	1	2	2	2	2
S9606_1826	hsa-miR-15b-5p	NA	2914	3321	1577	3733	3156	2414	2970	3390	1602	3829	3219	2465	2604	3101	2654	3171
S9606_1828	hsa-miR-4664-3p	NA	1	1	0	0	0	1	1	1	0	0	0	1	0.667	0.333	0.667	0.333
S9606_451	hsa-miR-6726-5p	NA	5	3	0	1	2	0	5	3	0	1	2	0	2.667	1	2.667	1
S9606_1832	hsa-miR-4485-3p	NA	11	23	3	7	37	5	11	23	3	7	37	5	12.333	16.333	12.333	16.333
S9606_452	hsa-miR-6797-3p	NA	1	0	0	2	2	0	1	0	0	2	2	0	0.333	1.333	0.333	1.333
S9606_1833	hsa-miR-3648	NA	0	4	3	1	0	11	0	4	3	1	0	11	2.333	4	2.333	4
S9606_454	hsa-miR-1914-5p	NA	2	0	0	3	0	1	2	0	0	3	0	1	0.667	1.333	0.667	1.333
S9606_455	hsa-miR-330-5p	NA	30	31	1	24	26	3	32	32	1	25	26	3	20.667	17.667	21.667	18
S9606_457	hsa-miR-139-5p	NA	7	18	33	18	13	93	7	19	33	18	13	94	19.333	41.333	19.667	41.667
S9606_459	hsa-miR-6761-5p	NA	0	0	0	1	0	0	0	0	0	1	0	0	0	0.333	0	0.333
S9606_458	hsa-miR-941	NA	201	350	40	215	229	61	202	350	40	216	229	61	197	168.333	197.333	168.667
S9606_460	hsa-miR-10401-3p	NA	1	0	4	1	2	3	1	0	4	1	2	3	1.667	2	1.667	2
S9606_462	hsa-miR-301a-5p	NA	0	1	2	5	4	2	0	1	2	5	4	2	1	3.667	1	3.667
S9606_463	hsa-miR-181b-3p	NA	0	1	0	0	0	0	0	1	0	0	0	0	0.333	0	0.333	0
S9606_1836	hsa-miR-937-5p	NA	0	1	1	0	2	1	0	1	1	0	2	1	0.667	1	0.667	1
S9606_1837	hsa-miR-10399-5p	NA	3	3	3	5	3	8	3	3	3	5	3	8	3	5.333	3	5.333
S9606_1839	hsa-miR-128-3p	NA	1379	1759	590	1258	1074	1065	1397	1784	593	1270	1083	1073	1242.67	1132.33	1258	1142
S9606_465	hsa-miR-548ap-3p	NA	1	2	4	1	3	16	1	2	4	1	3	16	2.333	6.667	2.333	6.667
S9606_468	hsa-miR-6855-3p	NA	1	0	0	0	0	1	1	0	0	0	0	1	0.333	0.333	0.333	0.333
S9606_469	hsa-miR-340-3p	NA	39	24	13	40	31	33	39	24	13	40	31	34	25.333	34.667	25.333	35
S9606_1843	hsa-miR-3175	NA	1	2	0	5	0	0	1	2	0	5	0	0	1	1.667	1	1.667
S9606_1844	hsa-miR-3158-5p	NA	0	0	0	0	1	0	0	0	0	0	1	0	0	0.333	0	0.333
S9606_471	hsa-miR-4742-5p	NA	0	0	0	2	0	0	0	0	0	2	0	0	0	0.667	0	0.667
S9606_1845	hsa-miR-4632-3p	NA	0	0	0	1	0	1	0	0	0	1	0	1	0	0.667	0	0.667
S9606_472	hsa-miR-451a	NA	779	80	1644	226	108	6632	785	82	1680	227	109	6948	834.333	2322	849	2428
S9606_474	hsa-miR-126-3p	NA	4716	4327	2398	5759	3715	7841	4897	4470	2444	6035	3808	8289	3813.67	5771.67	3937	6044
S9606_1846	hsa-miR-1237-3p	NA	1	0	1	4	2	3	1	0	1	4	2	3	0.667	3	0.667	3
S9606_476	hsa-miR-3194-3p	NA	4	0	3	1	1	4	4	0	3	1	1	4	2.333	2	2.333	2
S9606_1847	hsa-miR-4517	NA	2	4	3	15	4	2	2	4	3	15	4	2	3	7	3	7
S9606_1848	hsa-miR-155-3p	NA	3	3	0	6	3	6	3	3	0	6	3	6	2	5	2	5
S9606_1851	hsa-miR-4661-3p	NA	0	0	0	1	0	0	0	0	0	1	0	0	0	0.333	0	0.333
S9606_1850	hsa-miR-1268a	NA	187	212	153	327	291	144	187	213	153	327	291	144	184	254	184.333	254
S9606_480	hsa-miR-2277-5p	NA	2	7	1	2	7	0	2	7	1	2	7	0	3.333	3	3.333	3
S9606_483	hsa-miR-3125	NA	0	2	0	3	4	0	0	2	0	3	4	0	0.667	2.333	0.667	2.333
S9606_485	hsa-miR-103a-3p	NA	3697	3709	24	3169	2907	3079	3794	3797	24	3231	2966	3138	2476.67	3051.67	2538.33	3111.67
S9606_1856	hsa-miR-6838-5p	NA	1	2	0	1	0	1	1	2	0	1	0	1	1	0.667	1	0.667
S9606_487	hsa-let-7i-3p	NA	469	661	199	559	164	314	470	663	199	563	165	315	443	345.667	444	347.667
S9606_1858	hsa-miR-501-5p	NA	3	6	2	4	6	1	3	6	2	4	6	1	3.667	3.667	3.667	3.667
S9606_1857	hsa-miR-6757-5p	NA	1	0	0	0	0	0	1	0	0	0	0	0	0.333	0	0.333	0
S9606_489	hsa-miR-383-3p	NA	0	0	0	0	2	1	0	0	0	0	2	1	0	1	0	1
S9606_490	hsa-miR-199b-5p	NA	698	741	463	655	596	392	708	741	468	660	602	394	634	547.667	639	552
S9606_1859	hsa-miR-342-5p	NA	98	108	26	121	71	64	100	108	26	122	71	64	77.333	85.333	78	85.667
S9606_1860	hsa-miR-6758-5p	NA	0	1	0	0	0	1	0	1	0	0	0	1	0.333	0.333	0.333	0.333
S9606_495	hsa-miR-6821-5p	NA	3	4	0	3	1	0	3	4	0	3	1	0	2.333	1.333	2.333	1.333
S9606_1861	hsa-miR-1229-3p	NA	0	4	1	1	1	4	0	4	1	1	1	4	1.667	2	1.667	2
S9606_1863	hsa-miR-642a-3p	NA	5	1	0	2	4	0	5	1	0	2	4	0	2	2	2	2
S9606_1862	hsa-miR-1284	NA	15	16	2	13	10	4	15	16	2	13	10	4	11	9	11	9
S9606_497	hsa-miR-5580-5p	NA	2	0	1	1	3	0	2	0	1	1	4	0	1	1.333	1	1.667
S9606_500	hsa-miR-450a-1-3p	NA	19	18	9	30	31	19	19	18	9	30	31	19	15.333	26.667	15.333	26.667
S9606_502	hsa-miR-4781-5p	NA	0	0	0	0	1	1	0	0	0	0	1	1	0	0.667	0	0.667
S9606_1867	hsa-miR-556-5p	NA	1	0	0	0	0	0	1	0	0	0	0	0	0.333	0	0.333	0
S9606_1868	hsa-miR-4705	NA	0	0	0	0	0	1	0	0	0	0	0	1	0	0.333	0	0.333
S9606_504	hsa-miR-585-3p	NA	8	13	4	20	20	15	8	13	4	21	20	15	8.333	18.333	8.333	18.667
S9606_1870	hsa-miR-519a-5p	NA	1	0	0	0	0	0	1	0	0	0	0	0	0.333	0	0.333	0
S9606_1872	hsa-miR-145-3p	NA	218	168	69	117	106	38	219	169	69	119	106	39	151.667	87	152.333	88
S9606_1873	hsa-miR-2116-5p	NA	13	7	0	7	3	2	13	7	0	7	3	2	6.667	4	6.667	4
S9606_1875	hsa-miR-4741	NA	0	3	0	2	0	0	0	3	0	2	0	0	1	0.667	1	0.667
S9606_507	hsa-miR-329-3p	NA	161	217	179	357	198	319	161	218	180	358	198	319	185.667	291.333	186.333	291.667
S9606_508	hsa-miR-1915-5p	NA	2	3	0	1	2	0	2	3	0	1	2	0	1.667	1	1.667	1
S9606_509	hsa-miR-224-5p	NA	4	13	2	16	14	10	4	13	2	16	15	10	6.333	13.333	6.333	13.667
S9606_1877	hsa-miR-548t-5p	NA	0	0	0	1	1	1	0	0	0	1	1	1	0	1	0	1
S9606_1876	hsa-miR-6789-5p	NA	0	1	1	3	1	1	0	1	1	3	1	1	0.667	1.667	0.667	1.667
S9606_1878	hsa-miR-29c-3p	NA	700	577	182	602	538	379	706	579	182	606	539	379	486.333	506.333	489	508
S9606_1881	hsa-miR-483-5p	NA	305	448	57	416	139	80	306	449	57	418	139	80	270	211.667	270.667	212.333
S9606_1880	hsa-let-7f-5p	NA	63794	45630	35795	62550	50168	41345	110250	64780	46616	104487	73334	56308	48406.3	51354.3	73882	78043
S9606_1882	hsa-miR-6842-5p	NA	0	2	1	1	6	2	0	2	1	1	6	2	1	3	1	3
S9606_1883	hsa-miR-4745-5p	NA	3	0	0	0	1	0	3	0	0	0	1	0	1	0.333	1	0.333
S9606_513	hsa-miR-6511b-5p	NA	0	1	2	6	4	1	0	1	2	6	4	1	1	3.667	1	3.667
S9606_515	hsa-miR-144-3p	NA	0	2	30	0	0	167	0	2	30	0	0	167	10.667	55.667	10.667	55.667
S9606_1884	hsa-miR-7111-5p	NA	3	2	0	0	2	0	3	2	0	0	2	0	1.667	0.667	1.667	0.667
S9606_1886	hsa-let-7d-5p	NA	30008	24360	9898	29980	13970	14265	37812	28955	10616	37318	15352	15721	21422	19405	25794.3	22797
S9606_522	hsa-miR-499a-5p	NA	63	61	60	59	33	47	63	61	60	59	33	47	61.333	46.333	61.333	46.333
S9606_1887	hsa-miR-10526-3p	NA	65	61	11	84	68	9	65	61	11	84	68	9	45.667	53.667	45.667	53.667
S9606_1889	hsa-miR-30e-5p	NA	65	43	34	105	69	56	65	44	35	106	69	56	47.333	76.667	48	77
S9606_526	hsa-miR-374a-3p	NA	97	63	28	111	74	24	97	63	28	111	74	24	62.667	69.667	62.667	69.667
S9606_1890	hsa-miR-1271-5p	NA	518	672	160	487	317	294	522	674	161	489	317	294	450	366	452.333	366.667
S9606_527	hsa-miR-141-3p	NA	9	0	0	4	1	5	9	0	0	4	1	5	3	3.333	3	3.333
S9606_529	hsa-miR-339-5p	NA	83	98	106	175	89	179	83	98	107	175	90	179	95.667	147.667	96	148
S9606_530	hsa-miR-186-5p	NA	481	471	458	609	510	1532	482	475	459	611	512	1547	470	883.667	472	890
S9606_1892	hsa-miR-18a-3p	NA	17	21	13	26	18	22	17	21	13	27	18	22	17	22	17	22.333
S9606_531	hsa-miR-486-5p	NA	382	424	67	407	312	196	386	428	67	409	314	198	291	305	293.667	307
S9606_534	hsa-miR-548j-5p	NA	17	32	8	36	29	21	17	33	8	36	29	22	19	28.667	19.333	29
S9606_535	hsa-miR-548ay-5p	NA	15	11	3	14	9	6	15	11	3	14	9	6	9.667	9.667	9.667	9.667
S9606_1896	hsa-miR-3915	NA	0	0	1	1	0	0	0	0	1	1	0	0	0.333	0.333	0.333	0.333
S9606_539	hsa-miR-1273h-5p	NA	0	0	2	0	0	1	0	0	2	0	0	1	0.667	0.333	0.667	0.333
S9606_542	hsa-miR-218-5p	NA	1786	2530	1271	2309	2664	4548	1808	2574	1286	2353	2724	4718	1862.33	3173.67	1889.33	3265
S9606_541	hsa-miR-3117-5p	NA	3	7	1	5	5	0	3	7	1	5	5	0	3.667	3.333	3.667	3.333
S9606_1899	hsa-miR-6820-3p	NA	0	0	1	1	0	3	0	0	1	1	0	3	0.333	1.333	0.333	1.333
S9606_1900	hsa-miR-369-5p	NA	2433	2545	704	3691	2646	770	2475	2588	708	3780	2694	775	1894	2369	1923.67	2416.33
S9606_543	hsa-miR-663b	NA	3	3	2	0	2	2	3	3	2	0	2	2	2.667	1.333	2.667	1.333
S9606_1903	hsa-miR-4450	NA	0	1	0	0	0	0	0	1	0	0	0	0	0.333	0	0.333	0
S9606_546	hsa-miR-135a-5p	NA	6	8	8	9	2	28	6	8	8	9	2	28	7.333	13	7.333	13
S9606_549	hsa-miR-6785-5p	NA	0	1	0	0	0	0	0	1	0	0	0	0	0.333	0	0.333	0
S9606_1906	hsa-miR-4745-3p	NA	0	0	0	0	1	0	0	0	0	0	1	0	0	0.333	0	0.333
S9606_550	hsa-miR-93-5p	NA	6191	6822	1483	8395	8132	2394	6521	7194	1498	8940	8584	2430	4832	6307	5071	6651.33
S9606_551	hsa-miR-376c-5p	NA	6	1	1	2	3	6	6	1	1	2	3	6	2.667	3.667	2.667	3.667
S9606_556	hsa-miR-548k	NA	119	148	44	164	106	65	119	148	45	164	106	65	103.667	111.667	104	111.667
S9606_1907	hsa-miR-4725-5p	NA	7	13	0	13	23	4	7	14	0	13	23	4	6.667	13.333	7	13.333
S9606_557	hsa-miR-6736-5p	NA	14	13	1	18	9	1	14	13	1	18	9	1	9.333	9.333	9.333	9.333
S9606_559	hsa-miR-1236-5p	NA	0	0	0	1	0	0	0	0	0	1	0	0	0	0.333	0	0.333
S9606_1908	hsa-miR-6862-5p	NA	0	4	0	2	0	0	0	4	0	2	0	0	1.333	0.667	1.333	0.667
S9606_562	hsa-miR-4482-5p	NA	2	2	1	0	2	1	3	2	1	0	2	1	1.667	1	2	1
S9606_1909	hsa-miR-654-5p	NA	2412	2748	315	2368	2329	449	2455	2802	315	2400	2357	449	1825	1715.33	1857.33	1735.33
S9606_1910	hsa-miR-99a-3p	NA	1	2	0	3	1	1	1	2	0	3	1	1	1	1.667	1	1.667
S9606_566	hsa-miR-6511b-3p	NA	17	14	2	15	9	11	17	14	2	15	9	11	11	11.667	11	11.667
S9606_1914	hsa-miR-130b-5p	NA	235	288	68	320	244	104	237	290	68	323	244	105	197	222.667	198.333	224
S9606_1915	hsa-miR-487a-5p	NA	936	1045	267	1068	871	592	950	1057	269	1086	880	608	749.333	843.667	758.667	858
S9606_1916	hsa-miR-6799-3p	NA	3	1	0	1	1	0	4	1	0	1	1	0	1.333	0.667	1.667	0.667
S9606_571	hsa-miR-4803	NA	0	0	0	1	0	0	0	0	0	1	0	0	0	0.333	0	0.333
S9606_1917	hsa-miR-3064-3p	NA	2	1	0	5	0	0	2	1	0	5	0	0	1	1.667	1	1.667
S9606_573	hsa-miR-6509-3p	NA	2	1	0	1	2	0	2	1	0	1	2	0	1	1	1	1
S9606_1920	hsa-miR-939-5p	NA	3	3	2	5	3	0	3	3	2	5	3	0	2.667	2.667	2.667	2.667
S9606_575	hsa-miR-4772-3p	NA	0	0	1	0	0	4	0	0	1	0	0	4	0.333	1.333	0.333	1.333
S9606_1921	hsa-miR-485-5p	NA	3496	4213	686	4109	2783	1695	3623	4348	698	4242	2843	1734	2798.33	2862.33	2889.67	2939.67
S9606_1922	hsa-miR-9985	NA	1	0	1	1	2	1	1	0	1	1	2	1	0.667	1.333	0.667	1.333
S9606_577	hsa-miR-3193	NA	2	3	0	0	0	0	2	3	0	0	0	0	1.667	0	1.667	0
S9606_580	hsa-miR-10396a-5p	NA	2	8	15	0	1	0	2	8	15	0	1	0	8.333	0.333	8.333	0.333
S9606_1925	hsa-miR-4506	NA	0	0	0	0	1	0	0	0	0	0	1	0	0	0.333	0	0.333
S9606_1926	hsa-miR-6880-3p	NA	2	0	0	1	0	0	2	0	0	1	0	0	0.667	0.333	0.667	0.333
S9606_584	hsa-miR-379-3p	NA	488	385	108	407	363	178	493	388	108	407	363	178	327	316	329.667	316
S9606_585	hsa-miR-1304-3p	NA	40	49	3	21	39	2	40	49	3	21	39	2	30.667	20.667	30.667	20.667
S9606_1928	hsa-miR-122-5p	NA	14	5	32	11	8	27	14	6	32	11	8	27	17	15.333	17.333	15.333
S9606_586	hsa-miR-4530	NA	1	0	0	0	0	0	1	0	0	0	0	0	0.333	0	0.333	0
S9606_1930	hsa-miR-548f-5p	NA	0	0	0	0	1	0	0	0	0	0	1	0	0	0.333	0	0.333
S9606_1929	hsa-miR-206	NA	0	0	203	0	1	10	0	0	203	0	1	10	67.667	3.667	67.667	3.667
S9606_587	hsa-miR-4707-5p	NA	6	4	1	6	7	0	6	4	1	6	7	0	3.667	4.333	3.667	4.333
S9606_1931	hsa-miR-136-5p	NA	293	153	34	282	239	61	293	153	34	282	240	62	160	194	160	194.667
S9606_589	hsa-miR-24-1-5p	NA	52	33	2	29	58	9	52	33	2	29	58	9	29	32	29	32
S9606_592	hsa-miR-5010-5p	NA	35	56	1	38	29	1	35	56	1	38	29	1	30.667	22.667	30.667	22.667
S9606_596	hsa-miR-7703	NA	0	0	0	0	0	1	0	0	0	0	0	1	0	0.333	0	0.333
S9606_597	hsa-miR-652-5p	NA	1	10	0	5	6	1	1	10	0	5	6	1	3.667	4	3.667	4
S9606_1939	hsa-miR-1972	NA	0	0	0	0	2	0	0	0	0	0	2	0	0	0.667	0	0.667
S9606_1940	hsa-miR-340-5p	NA	1885	1328	382	1940	1404	648	1910	1342	386	1973	1418	650	1198.33	1330.67	1212.67	1347
S9606_1941	hsa-miR-3120-5p	NA	0	0	0	4	0	0	0	0	0	4	0	0	0	1.333	0	1.333
S9606_1942	hsa-miR-485-3p	NA	569	596	315	1011	569	552	571	603	316	1022	572	555	493.333	710.667	496.667	716.333
S9606_1944	hsa-miR-25-3p	NA	468	516	554	486	452	904	471	517	556	486	453	907	512.667	614	514.667	615.333
S9606_1945	hsa-miR-4684-3p	NA	0	3	0	0	0	0	0	3	0	0	0	0	1	0	1	0
S9606_604	hsa-miR-6812-5p	NA	1	0	0	0	0	0	1	0	0	0	0	0	0.333	0	0.333	0
S9606_605	hsa-miR-556-3p	NA	0	0	0	0	0	2	0	0	0	0	0	2	0	0.667	0	0.667
S9606_1946	hsa-miR-6728-5p	NA	5	2	0	2	2	0	5	2	0	2	2	0	2.333	1.333	2.333	1.333
S9606_608	hsa-miR-548o-5p	NA	0	1	0	0	1	0	0	1	0	0	1	0	0.333	0.333	0.333	0.333
S9606_609	hsa-miR-367-3p	NA	1	2	0	0	1	0	1	2	0	0	1	0	1	0.333	1	0.333
S9606_1949	hsa-miR-3688-3p	NA	2	0	0	0	2	1	2	0	0	0	2	1	0.667	1	0.667	1
S9606_612	hsa-miR-548aq-3p	NA	2	8	0	3	0	3	2	8	0	3	0	3	3.333	2	3.333	2
S9606_1950	hsa-miR-6851-5p	NA	1	5	0	3	4	1	1	5	0	3	4	1	2	2.667	2	2.667
S9606_616	hsa-miR-5191	NA	0	0	0	0	2	0	0	0	0	0	2	0	0	0.667	0	0.667
S9606_617	hsa-miR-4738-3p	NA	0	1	0	1	0	0	0	1	0	1	0	0	0.333	0.333	0.333	0.333
S9606_1951	hsa-miR-455-3p	NA	632	714	282	598	288	165	637	718	282	605	288	165	542.667	350.333	545.667	352.667
S9606_619	hsa-miR-423-5p	NA	30	81	1078	54	5735	4	30	82	1086	54	5950	4	396.333	1931	399.333	2002.67
S9606_1952	hsa-miR-425-5p	NA	1401	1692	589	1694	1402	1443	1428	1724	593	1728	1424	1468	1227.33	1513	1248.33	1540
S9606_1953	hsa-miR-181c-5p	NA	525	512	452	543	409	846	529	513	454	551	413	852	496.333	599.333	498.667	605.333
S9606_621	hsa-miR-9901	NA	28	18	79	4	10	15	28	18	79	4	10	15	41.667	9.667	41.667	9.667
S9606_622	hsa-miR-1272	NA	0	0	0	1	0	0	0	0	0	1	0	0	0	0.333	0	0.333
S9606_1957	hsa-miR-338-3p	NA	0	0	0	4	0	5	0	0	0	4	0	5	0	3	0	3
S9606_1958	hsa-miR-499b-5p	NA	0	0	1	1	1	1	0	0	1	1	1	1	0.333	1	0.333	1
S9606_624	hsa-miR-200a-3p	NA	4	5	2	2	5	1	4	5	2	2	5	1	3.667	2.667	3.667	2.667
S9606_625	hsa-miR-6870-5p	NA	0	0	0	0	0	1	0	0	0	0	0	1	0	0.333	0	0.333
S9606_1959	hsa-miR-211-5p	NA	0	2	0	1	1	1	0	2	0	1	1	1	0.667	1	0.667	1
S9606_629	hsa-miR-3184-3p	NA	12919	14709	4	9345	63	1841	14097	16316	4	9956	63	1868	9210.67	3749.67	10139	3962.33
S9606_1963	hsa-miR-219a-5p	NA	1	0	0	0	0	0	1	0	0	0	0	0	0.333	0	0.333	0
S9606_631	hsa-miR-29b-1-5p	NA	1804	1958	352	1465	1642	625	1832	1999	353	1498	1666	631	1371.33	1244	1394.67	1265
S9606_630	hsa-miR-548e-3p	NA	4	10	9	30	3	13	4	10	9	30	3	13	7.667	15.333	7.667	15.333
S9606_1966	hsa-miR-4436b-5p	NA	0	1	0	0	0	0	0	1	0	0	0	0	0.333	0	0.333	0
S9606_1965	hsa-miR-219a-1-3p	NA	3	6	0	5	14	3	3	6	0	5	14	3	3	7.333	3	7.333
S9606_634	hsa-miR-1343-3p	NA	10	7	1	10	18	2	10	7	1	11	18	2	6	10	6	10.333
S9606_1967	hsa-miR-3121-5p	NA	1	1	0	0	0	0	1	1	0	0	0	0	0.667	0	0.667	0
S9606_1969	hsa-miR-4523	NA	1	0	0	0	0	0	1	0	0	0	0	0	0.333	0	0.333	0
S9606_1970	hsa-miR-140-3p	NA	150	159	84	175	122	136	150	160	84	175	124	136	131	144.333	131.333	145
S9606_638	hsa-miR-137-5p	NA	33	34	9	47	36	10	33	34	9	48	36	10	25.333	31	25.333	31.333
S9606_639	hsa-miR-10395-3p	NA	0	0	1	5	2	2	0	0	1	5	2	2	0.333	3	0.333	3
S9606_1976	hsa-miR-625-5p	NA	223	198	48	197	190	139	224	198	48	197	191	139	156.333	175.333	156.667	175.667
S9606_1977	hsa-miR-1287-3p	NA	41	40	11	57	51	24	41	40	11	58	51	24	30.667	44	30.667	44.333
S9606_1978	hsa-miR-369-3p	NA	5731	3786	3001	6312	4972	4062	5975	3873	3061	6557	5103	4162	4172.67	5115.33	4303	5274
S9606_641	hsa-miR-410-3p	NA	9567	8882	2288	12271	10428	2978	10287	9467	2329	13338	11175	3051	6912.33	8559	7361	9188
S9606_1979	hsa-miR-132-3p	NA	29	45	34	44	35	78	29	45	34	44	35	78	36	52.333	36	52.333
S9606_643	hsa-miR-365b-3p	NA	189	129	366	218	155	473	190	129	367	218	156	474	228	282	228.667	282.667
S9606_644	hsa-miR-3164	NA	1	7	0	4	4	0	1	7	0	4	4	0	2.667	2.667	2.667	2.667
S9606_645	hsa-miR-216a-5p	NA	8	14	0	15	8	1	8	14	0	15	8	1	7.333	8	7.333	8
S9606_1981	hsa-miR-1537-5p	NA	1	0	0	3	2	0	1	0	0	3	2	0	0.333	1.667	0.333	1.667
S9606_646	hsa-miR-514a-5p	NA	1	0	0	0	0	0	1	0	0	0	0	0	0.333	0	0.333	0
S9606_650	hsa-miR-4467	NA	1	0	0	0	1	0	1	0	0	0	1	0	0.333	0.333	0.333	0.333
S9606_651	hsa-miR-6734-5p	NA	2	11	2	13	2	2	2	11	2	13	2	2	5	5.667	5	5.667
S9606_1985	hsa-miR-1908-3p	NA	2	4	0	2	3	0	2	4	0	2	3	0	2	1.667	2	1.667
S9606_652	hsa-miR-155-5p	NA	2699	2578	3112	4543	3997	6142	2768	2622	3195	4709	4120	6403	2796.33	4894	2861.67	5077.33
S9606_1987	hsa-miR-6514-3p	NA	0	0	0	5	2	1	0	0	0	5	2	1	0	2.667	0	2.667
S9606_657	hsa-let-7d-3p	NA	3193	4074	617	3003	2763	1222	3300	4220	621	3079	2817	1238	2628	2329.33	2713.67	2378
S9606_1988	hsa-miR-6738-3p	NA	3	3	0	2	1	0	3	3	0	2	1	0	2	1	2	1
S9606_658	hsa-miR-11399	NA	2	0	1	0	1	0	2	0	1	0	1	0	1	0.333	1	0.333
S9606_1992	hsa-miR-130a-3p	NA	1563	1601	310	1912	1876	463	1592	1620	311	1932	1902	466	1158	1417	1174.33	1433.33
S9606_661	hsa-miR-3652	NA	0	0	1	0	0	0	0	0	1	0	0	0	0.333	0	0.333	0
S9606_1994	hsa-miR-5088-3p	NA	0	0	0	0	0	1	0	0	0	0	0	1	0	0.333	0	0.333
S9606_662	hsa-miR-1275	NA	452	535	34	752	434	43	453	536	34	753	437	43	340.333	409.667	341	411
S9606_663	hsa-miR-500a-3p	NA	24	20	19	37	29	25	24	20	21	37	30	25	21	30.333	21.667	30.667
S9606_1996	hsa-miR-142-3p	NA	2	0	331	3	0	1364	2	0	333	3	0	1386	111	455.667	111.667	463
S9606_1997	hsa-miR-4474-5p	NA	0	1	0	0	0	0	0	1	0	0	0	0	0.333	0	0.333	0
S9606_666	hsa-miR-219a-2-3p	NA	0	0	1	0	0	0	0	0	1	0	0	0	0.333	0	0.333	0
S9606_667	hsa-miR-22-3p	NA	126823	133776	86811	130047	127996	104488	657258	723754	197698	610593	567699	301201	115803	120844	526237	493164
S9606_669	hsa-miR-411-5p	NA	33815	40324	7672	33868	28430	14957	44266	54572	8116	43190	34981	16633	27270.3	25751.7	35651.3	31601.3
S9606_668	hsa-miR-570-5p	NA	3	0	0	1	0	1	3	0	0	1	0	1	1	0.667	1	0.667
S9606_2000	hsa-miR-1537-3p	NA	38	32	6	22	36	10	38	32	6	22	36	10	25.333	22.667	25.333	22.667
S9606_671	hsa-miR-891b	NA	0	0	1	0	0	0	0	0	1	0	0	0	0.333	0	0.333	0
S9606_672	hsa-miR-6884-3p	NA	1	1	0	0	1	0	1	1	0	0	2	0	0.667	0.333	0.667	0.667
S9606_2002	hsa-miR-5187-5p	NA	11	5	1	6	9	2	11	5	1	6	9	2	5.667	5.667	5.667	5.667
S9606_673	hsa-miR-3606-5p	NA	0	0	0	0	0	1	0	0	0	0	0	1	0	0.333	0	0.333
S9606_677	hsa-miR-4653-3p	NA	0	0	0	1	0	0	0	0	0	1	0	0	0	0.333	0	0.333
S9606_2005	hsa-miR-3529-5p	NA	2	0	0	0	0	1	2	0	0	0	0	1	0.667	0.333	0.667	0.333
S9606_679	hsa-miR-5090	NA	5	5	2	3	2	0	5	5	2	3	2	0	4	1.667	4	1.667
S9606_680	hsa-miR-365a-3p	NA	189	129	366	218	155	473	190	129	367	218	156	474	228	282	228.667	282.667
S9606_2008	hsa-miR-27a-3p	NA	84531	100336	14152	84593	83905	11581	194717	267227	15727	179711	177539	12605	66339.7	60026.3	159224	123285
S9606_682	hsa-miR-3179	NA	7	2	1	8	4	1	7	2	1	8	4	1	3.333	4.333	3.333	4.333
S9606_684	hsa-miR-744-3p	NA	51	66	8	48	52	17	52	66	8	48	52	17	41.667	39	42	39
S9606_685	hsa-miR-3152-5p	NA	22	14	7	18	20	8	22	14	7	18	20	8	14.333	15.333	14.333	15.333
S9606_2009	hsa-miR-671-5p	NA	935	1151	370	1885	1409	543	940	1161	373	1908	1421	544	818.667	1279	824.667	1291
S9606_2010	hsa-miR-1285-5p	NA	5	7	0	1	1	2	5	7	0	1	1	2	4	1.333	4	1.333
S9606_2014	hsa-miR-539-5p	NA	257	233	84	421	319	117	258	233	84	421	321	119	191.333	285.667	191.667	287
S9606_686	hsa-miR-138-2-3p	NA	2	3	1	0	0	0	2	3	1	0	0	0	2	0	2	0
S9606_2016	hsa-miR-33b-5p	NA	1	2	0	0	0	1	1	2	0	0	0	1	1	0.333	1	0.333
S9606_2017	hsa-miR-7108-3p	NA	1	2	0	0	1	1	1	2	0	0	1	1	1	0.667	1	0.667
S9606_2019	hsa-miR-3916	NA	0	1	0	1	5	1	0	1	0	1	5	1	0.333	2.333	0.333	2.333
S9606_690	hsa-miR-502-3p	NA	64	86	60	122	79	109	64	87	60	122	79	109	70	103.333	70.333	103.333
S9606_2023	hsa-miR-3170	NA	0	0	0	2	0	0	0	0	0	2	0	0	0	0.667	0	0.667
S9606_2021	hsa-miR-6756-3p	NA	0	0	0	0	1	0	0	0	0	0	1	0	0	0.333	0	0.333
S9606_2024	hsa-miR-4754	NA	1	2	0	6	2	2	1	2	0	6	2	2	1	3.333	1	3.333
S9606_693	hsa-miR-3064-5p	NA	11	18	0	16	9	7	11	18	0	16	9	7	9.667	10.667	9.667	10.667
S9606_2026	hsa-miR-490-5p	NA	12449	16623	3460	14166	10693	5494	13700	18642	3525	15558	11469	5696	10844	10117.7	11955.7	10907.7
S9606_2027	hsa-miR-34c-5p	NA	354	408	72	447	181	59	356	411	73	452	181	59	278	229	280	230.667
S9606_2028	hsa-miR-522-3p	NA	4	0	0	1	2	0	4	0	0	1	2	0	1.333	1	1.333	1
S9606_2030	hsa-miR-4306	NA	5	0	0	1	2	0	5	0	0	1	2	0	1.667	1	1.667	1
S9606_694	hsa-miR-889-5p	NA	68	89	12	83	53	30	68	90	12	83	53	30	56.333	55.333	56.667	55.333
S9606_695	hsa-miR-6745	NA	0	0	0	0	0	1	0	0	0	0	0	1	0	0.333	0	0.333
S9606_696	hsa-miR-3918	NA	4	2	0	1	10	1	4	2	0	1	10	1	2	4	2	4
S9606_697	hsa-miR-4755-5p	NA	0	1	1	0	0	1	0	1	1	0	0	1	0.667	0.333	0.667	0.333
S9606_2033	hsa-miR-365b-5p	NA	236	267	36	258	186	76	237	267	37	258	188	76	179.667	173.333	180.333	174
S9606_2034	hsa-miR-4802-3p	NA	0	2	0	0	0	0	0	2	0	0	0	0	0.667	0	0.667	0
S9606_699	hsa-miR-3619-3p	NA	5	6	0	1	2	1	5	6	0	1	2	1	3.667	1.333	3.667	1.333
S9606_700	hsa-miR-192-3p	NA	0	0	0	1	1	3	0	0	0	1	1	3	0	1.667	0	1.667
S9606_2037	hsa-miR-3127-5p	NA	3	10	1	6	4	2	3	10	1	6	4	2	4.667	4	4.667	4
S9606_2038	hsa-miR-185-5p	NA	2062	2564	708	2145	653	998	2095	2601	710	2177	657	1006	1778	1265.33	1802	1280
S9606_2036	hsa-miR-6876-3p	NA	0	1	0	2	0	0	0	1	0	2	0	0	0.333	0.667	0.333	0.667
S9606_2039	hsa-miR-6503-3p	NA	0	0	0	0	0	1	0	0	0	0	0	1	0	0.333	0	0.333
S9606_704	hsa-miR-1233-5p	NA	0	0	0	1	2	0	0	0	0	1	2	0	0	1	0	1
S9606_2041	hsa-miR-5698	NA	1	4	0	0	0	0	1	4	0	0	0	0	1.667	0	1.667	0
S9606_706	hsa-miR-2114-5p	NA	15	40	17	31	25	11	15	40	17	31	25	11	24	22.333	24	22.333
S9606_2042	hsa-miR-4477b	NA	2	0	0	0	2	0	2	0	0	0	2	0	0.667	0.667	0.667	0.667
S9606_2045	hsa-miR-7-2-3p	NA	1	4	0	3	4	2	1	4	0	3	4	2	1.667	3	1.667	3
S9606_707	hsa-miR-222-5p	NA	5	7	4	6	9	0	5	7	4	6	9	0	5.333	5	5.333	5
S9606_708	hsa-miR-542-3p	NA	30	24	22	51	27	27	30	24	22	51	27	27	25.333	35	25.333	35
S9606_709	hsa-miR-4768-5p	NA	0	1	0	0	1	0	0	1	0	0	1	0	0.333	0.333	0.333	0.333
S9606_2050	hsa-miR-6807-3p	NA	0	1	0	0	0	0	0	1	0	0	0	0	0.333	0	0.333	0
S9606_710	hsa-miR-589-5p	NA	148	201	57	115	113	128	148	201	57	115	113	128	135.333	118.667	135.333	118.667
S9606_2052	hsa-miR-549a-3p	NA	184	188	66	139	144	99	184	189	66	140	144	99	146	127.333	146.333	127.667
S9606_713	hsa-miR-624-3p	NA	0	0	0	2	0	0	0	0	0	2	0	0	0	0.667	0	0.667
S9606_716	hsa-miR-181c-3p	NA	1	5	0	3	2	1	1	5	0	3	2	1	2	2	2	2
S9606_717	hsa-miR-6766-5p	NA	0	1	0	0	0	1	0	1	0	0	0	1	0.333	0.333	0.333	0.333
S9606_720	hsa-miR-181a-2-3p	NA	2787	3391	905	1464	2168	1356	2847	3489	915	1480	2200	1372	2361	1662.67	2417	1684
S9606_723	hsa-miR-335-3p	NA	164	141	120	422	139	103	164	141	120	422	139	103	141.667	221.333	141.667	221.333
S9606_721	hsa-miR-6814-5p	NA	1	0	0	0	0	0	1	0	0	0	0	0	0.333	0	0.333	0
S9606_2056	hsa-miR-4284	NA	45	52	1	71	62	0	45	52	1	71	62	0	32.667	44.333	32.667	44.333
S9606_2055	hsa-miR-6890-5p	NA	1	0	0	2	0	0	1	0	0	2	0	0	0.333	0.667	0.333	0.667
S9606_726	hsa-miR-27a-5p	NA	1682	2687	509	2131	1783	583	1705	2740	512	2163	1816	586	1626	1499	1652.33	1521.67
S9606_727	hsa-miR-942-3p	NA	15	23	1	9	18	3	15	23	1	9	18	3	13	10	13	10
S9606_728	hsa-miR-376a-2-5p	NA	0	0	1	0	0	0	0	0	1	0	0	0	0.333	0	0.333	0
S9606_731	hsa-miR-1245a	NA	6	3	2	3	3	1	6	3	2	3	3	1	3.667	2.333	3.667	2.333
S9606_2061	hsa-miR-3667-5p	NA	0	0	0	0	0	1	0	0	0	0	0	1	0	0.333	0	0.333
S9606_732	hsa-miR-6884-5p	NA	0	0	0	0	0	1	0	0	0	0	0	1	0	0.333	0	0.333
S9606_2062	hsa-miR-450a-5p	NA	708	443	300	558	569	323	717	446	306	563	572	330	483.667	483.333	489.667	488.333
S9606_2066	hsa-miR-1290	NA	0	0	0	0	0	1	0	0	0	0	0	1	0	0.333	0	0.333
S9606_2065	hsa-miR-3163	NA	1	0	0	0	0	0	1	0	0	0	0	0	0.333	0	0.333	0
S9606_741	hsa-miR-18b-5p	NA	0	0	0	0	1	0	0	0	0	0	1	0	0	0.333	0	0.333
S9606_2068	hsa-miR-663a	NA	0	0	26	0	7	33	0	0	26	0	7	33	8.667	13.333	8.667	13.333
S9606_742	hsa-miR-18a-5p	NA	433	474	77	409	428	140	435	476	77	419	430	142	328	325.667	329.333	330.333
S9606_2070	hsa-miR-9-5p	NA	9	7	4	2	3	8	9	7	4	2	3	8	6.667	4.333	6.667	4.333
S9606_744	hsa-miR-3943	NA	0	0	1	0	0	0	0	0	1	0	0	0	0.333	0	0.333	0
S9606_2072	hsa-miR-378c	NA	0	0	0	0	0	1	0	0	0	0	0	1	0	0.333	0	0.333
S9606_2073	hsa-miR-216a-3p	NA	0	0	0	1	2	0	0	0	0	1	2	0	0	1	0	1
S9606_746	hsa-miR-7-1-3p	NA	457	512	151	448	489	299	462	515	153	453	489	299	373.333	412	376.667	413.667
S9606_749	hsa-miR-6839-5p	NA	0	0	0	1	0	0	0	0	0	1	0	0	0	0.333	0	0.333
S9606_2076	hsa-miR-125a-5p	NA	5817	7112	1379	12614	5591	3199	6077	7502	1401	13811	5811	3294	4769.33	7134.67	4993.33	7638.67
S9606_751	hsa-miR-337-5p	NA	2181	1949	179	2315	2339	347	2205	1982	179	2355	2383	348	1436.33	1667	1455.33	1695.33
S9606_2077	hsa-miR-378e	NA	1	0	0	0	0	0	1	0	0	0	0	0	0.333	0	0.333	0
S9606_2078	hsa-miR-3617-5p	NA	7	1	0	3	5	3	7	1	0	3	5	3	2.667	3.667	2.667	3.667
S9606_753	hsa-miR-374a-5p	NA	217	127	82	268	215	161	219	127	82	271	216	161	142	214.667	142.667	216
S9606_754	hsa-miR-6513-3p	NA	0	3	0	1	0	3	0	3	0	1	0	3	1	1.333	1	1.333
S9606_2079	hsa-miR-3662	NA	4	5	0	6	6	1	4	5	0	6	6	1	3	4.333	3	4.333
S9606_756	hsa-miR-28-3p	NA	886	988	235	777	667	338	894	995	237	784	673	338	703	594	708.667	598.333
S9606_757	hsa-miR-4640-5p	NA	2	1	0	0	1	1	2	1	0	0	1	1	1	0.667	1	0.667
S9606_2082	hsa-miR-3140-3p	NA	3	0	0	0	0	0	3	0	0	0	0	0	1	0	1	0
S9606_758	hsa-miR-3611	NA	1	1	1	1	1	4	1	1	1	1	1	4	1	2	1	2
S9606_2083	hsa-miR-181b-2-3p	NA	8	14	6	1	13	8	8	14	6	1	13	8	9.333	7.333	9.333	7.333
S9606_760	hsa-miR-10a-5p	NA	16	7	20	24	12	67	16	7	20	24	12	67	14.333	34.333	14.333	34.333
S9606_761	hsa-miR-29b-2-5p	NA	2	3	0	4	7	2	2	3	0	4	7	2	1.667	4.333	1.667	4.333
S9606_2087	hsa-miR-493-3p	NA	4330	3658	962	3459	3643	1669	4484	3762	966	3548	3744	1691	2983.33	2923.67	3070.67	2994.33
S9606_2090	hsa-miR-99a-5p	NA	6061	6772	4741	6812	5618	4988	6333	7099	4919	7134	5800	5160	5858	5806	6117	6031.33
S9606_2091	hsa-miR-196a-5p	NA	0	0	430	0	0	34	0	0	433	0	0	34	143.333	11.333	144.333	11.333
S9606_763	hsa-miR-4727-3p	NA	0	1	0	0	1	0	0	1	0	0	1	0	0.333	0.333	0.333	0.333
S9606_762	hsa-miR-561-3p	NA	1	2	0	3	2	0	1	2	0	3	2	0	1	1.667	1	1.667
S9606_2092	hsa-miR-4743-5p	NA	0	1	1	2	0	1	0	1	1	2	0	1	0.667	1	0.667	1
S9606_2093	hsa-miR-4723-3p	NA	0	0	0	0	0	1	0	0	0	0	0	1	0	0.333	0	0.333
S9606_2094	hsa-miR-6763-5p	NA	1	0	0	0	1	0	1	0	0	0	1	0	0.333	0.333	0.333	0.333
S9606_766	hsa-miR-6516-5p	NA	14	7	7	11	7	7	14	7	7	11	7	7	9.333	8.333	9.333	8.333
S9606_767	hsa-miR-3146	NA	2	3	0	1	0	0	2	3	0	1	0	0	1.667	0.333	1.667	0.333
S9606_768	hsa-miR-4707-3p	NA	89	158	26	112	111	22	89	158	26	112	111	22	91	81.667	91	81.667
S9606_769	hsa-miR-6860	NA	1	1	0	0	0	2	1	1	0	0	0	2	0.667	0.667	0.667	0.667
S9606_2095	hsa-miR-6809-5p	NA	3	0	1	1	2	2	3	0	1	1	2	2	1.333	1.667	1.333	1.667
S9606_2100	hsa-miR-3613-3p	NA	0	1	0	0	0	0	0	1	0	0	0	0	0.333	0	0.333	0
S9606_774	hsa-miR-5587-3p	NA	1	1	0	0	0	0	1	1	0	0	0	0	0.667	0	0.667	0
S9606_2101	hsa-miR-548a-5p	NA	2	1	0	0	0	1	2	1	0	0	0	1	1	0.333	1	0.333
S9606_2102	hsa-miR-1180-5p	NA	1	1	1	3	4	1	1	1	1	3	4	1	1	2.667	1	2.667
S9606_2104	hsa-miR-4669	NA	11	9	0	7	5	0	11	9	0	7	5	0	6.667	4	6.667	4
S9606_776	hsa-miR-4726-5p	NA	6	4	0	3	4	1	6	4	0	3	4	1	3.333	2.667	3.333	2.667
S9606_775	hsa-miR-490-3p	NA	246	256	116	261	205	183	246	256	116	261	205	183	206	216.333	206	216.333
S9606_779	hsa-miR-4726-3p	NA	0	1	0	0	0	0	0	1	0	0	0	0	0.333	0	0.333	0
S9606_2105	hsa-miR-497-5p	NA	62	67	35	74	52	61	62	68	35	75	52	61	54.667	62.333	55	62.667
S9606_780	hsa-miR-101-3p	NA	47	21	31	54	35	60	47	21	32	54	35	60	33	49.667	33.333	49.667
S9606_2106	hsa-miR-4426	NA	0	0	0	0	0	1	0	0	0	0	0	1	0	0.333	0	0.333
S9606_781	hsa-miR-4644	NA	0	1	1	0	0	0	0	1	1	0	0	0	0.667	0	0.667	0
S9606_782	hsa-miR-6716-5p	NA	0	1	0	0	1	0	0	1	0	0	1	0	0.333	0.333	0.333	0.333
S9606_783	hsa-miR-301b-5p	NA	0	1	0	1	1	2	0	1	0	1	1	2	0.333	1.333	0.333	1.333
S9606_784	hsa-miR-127-5p	NA	12	17	6	35	18	16	12	17	6	35	18	16	11.667	23	11.667	23
S9606_785	hsa-miR-3134	NA	4	1	0	4	1	2	4	1	0	4	1	2	1.667	2.333	1.667	2.333
S9606_2110	hsa-miR-6889-5p	NA	3	2	0	3	2	0	3	2	0	3	2	0	1.667	1.667	1.667	1.667
S9606_786	hsa-miR-4663	NA	0	0	0	0	1	0	0	0	0	0	1	0	0	0.333	0	0.333
S9606_2112	hsa-miR-363-3p	NA	0	0	21	2	2	67	0	0	21	2	2	67	7	23.667	7	23.667
S9606_787	hsa-miR-193b-3p	NA	7865	9054	5305	8650	7406	11115	8333	9688	5499	9164	7798	11968	7408	9057	7840	9643.33
S9606_2113	hsa-miR-3620-3p	NA	1	1	0	2	1	0	1	1	0	2	1	0	0.667	1	0.667	1
S9606_788	hsa-miR-589-3p	NA	50	79	12	37	59	13	50	79	12	38	59	14	47	36.333	47	37
S9606_793	hsa-miR-5194	NA	0	1	0	0	0	0	0	1	0	0	0	0	0.333	0	0.333	0
S9606_797	hsa-miR-597-3p	NA	1	0	0	1	1	0	1	0	0	1	1	0	0.333	0.667	0.333	0.667
S9606_2117	hsa-miR-3154	NA	17	28	1	31	19	5	17	28	1	32	19	5	15.333	18.333	15.333	18.667
S9606_2115	hsa-miR-6869-5p	NA	1	0	0	0	0	0	1	0	0	0	0	0	0.333	0	0.333	0
S9606_796	hsa-miR-6836-3p	NA	1	0	0	0	0	0	1	0	0	0	0	0	0.333	0	0.333	0
S9606_2116	hsa-miR-320a-5p	NA	0	1	1	0	0	0	0	1	1	0	0	0	0.667	0	0.667	0
S9606_798	hsa-miR-548x-5p	NA	0	0	0	1	0	0	0	0	0	1	0	0	0	0.333	0	0.333
S9606_2118	hsa-miR-4685-5p	NA	0	1	0	0	0	0	0	1	0	0	0	0	0.333	0	0.333	0
S9606_2119	hsa-miR-6853-3p	NA	0	0	0	0	2	0	0	0	0	0	2	0	0	0.667	0	0.667
S9606_800	hsa-miR-6793-5p	NA	1	2	1	0	1	0	1	2	1	0	1	0	1.333	0.333	1.333	0.333
S9606_2122	hsa-miR-493-5p	NA	21481	17799	5434	21325	19668	7602	25323	20091	5635	24809	22535	7999	14904.7	16198.3	17016.3	18447.7
S9606_2125	hsa-miR-629-5p	NA	117	94	48	116	101	112	117	94	48	116	101	112	86.333	109.667	86.333	109.667
S9606_2126	hsa-miR-6776-3p	NA	0	0	0	0	1	1	0	0	0	0	1	1	0	0.667	0	0.667
S9606_2127	hsa-miR-4423-5p	NA	32	43	16	59	41	31	32	43	17	59	41	31	30.333	43.667	30.667	43.667
S9606_804	hsa-miR-24-3p	NA	65008	65403	35305	87685	71016	70670	116390	112038	45830	191897	128832	129229	55238.7	76457	91419.3	149986
S9606_806	hsa-miR-3934-5p	NA	4	5	0	11	10	0	4	5	0	11	10	0	3	7	3	7
S9606_2129	hsa-miR-6780b-3p	NA	1	2	0	1	1	3	1	2	0	1	1	3	1	1.667	1	1.667
S9606_805	hsa-miR-6825-5p	NA	6	3	1	3	1	0	6	3	1	3	1	0	3.333	1.333	3.333	1.333
S9606_2130	hsa-miR-655-3p	NA	1244	792	561	1127	1092	696	1253	794	564	1142	1098	697	865.667	971.667	870.333	979
S9606_2131	hsa-miR-181d-5p	NA	920	915	125	944	805	178	925	922	126	957	812	180	653.333	642.333	657.667	649.667
S9606_2132	hsa-miR-4443	NA	20	29	2	39	29	1	20	29	2	39	29	1	17	23	17	23
S9606_2134	hsa-miR-2116-3p	NA	5	5	0	2	4	0	5	5	0	2	4	0	3.333	2	3.333	2
S9606_809	hsa-miR-598-3p	NA	97	100	131	109	100	206	97	101	131	109	100	207	109.333	138.333	109.667	138.667
S9606_811	hsa-miR-548an	NA	0	0	0	0	0	1	0	0	0	0	0	1	0	0.333	0	0.333
S9606_2135	hsa-miR-6895-5p	NA	0	1	0	0	0	1	0	1	0	0	0	1	0.333	0.333	0.333	0.333
S9606_2137	hsa-miR-22-5p	NA	698	704	577	680	552	722	702	708	580	684	554	726	659.667	651.333	663.333	654.667
S9606_812	hsa-miR-134-5p	NA	7113	7695	1802	7154	6348	2959	7501	8113	1824	7529	6634	3038	5536.67	5487	5812.67	5733.67
S9606_2138	hsa-miR-3190-3p	NA	1	1	0	1	0	0	1	1	0	1	0	0	0.667	0.333	0.667	0.333
S9606_816	hsa-miR-6749-5p	NA	0	0	1	0	0	0	0	0	1	0	0	0	0.333	0	0.333	0
S9606_817	hsa-miR-182-3p	NA	0	0	0	1	0	0	0	0	0	1	0	0	0	0.333	0	0.333
S9606_2141	hsa-miR-28-5p	NA	4420	3904	989	4655	4005	1662	4597	4028	1006	4831	4118	1685	3104.33	3440.67	3210.33	3544.67
S9606_818	hsa-miR-625-3p	NA	36	37	22	21	34	41	36	37	22	21	34	41	31.667	32	31.667	32
S9606_819	hsa-miR-616-5p	NA	0	0	0	3	0	2	0	0	0	3	0	2	0	1.667	0	1.667
S9606_2143	hsa-miR-323a-3p	NA	2603	3200	572	3051	2694	988	2639	3264	572	3115	2741	993	2125	2244.33	2158.33	2283
S9606_2145	hsa-miR-3173-3p	NA	0	1	0	0	1	0	0	1	0	0	1	0	0.333	0.333	0.333	0.333
S9606_820	hsa-miR-138-5p	NA	31436	38626	9851	33099	32583	11242	40330	51562	10551	41969	41204	12142	26637.7	25641.3	34147.7	31771.7
S9606_2147	hsa-miR-6767-5p	NA	0	0	0	1	0	0	0	0	0	1	0	0	0	0.333	0	0.333
S9606_821	hsa-miR-4448	NA	1	0	0	0	0	0	1	0	0	0	0	0	0.333	0	0.333	0
S9606_824	hsa-miR-3117-3p	NA	83	97	22	88	78	24	83	97	22	89	78	24	67.333	63.333	67.333	63.667
S9606_823	hsa-miR-3065-3p	NA	7	10	5	12	5	7	7	10	5	12	5	7	7.333	8	7.333	8
S9606_825	hsa-miR-6852-3p	NA	3	1	1	0	0	0	3	1	1	0	0	0	1.667	0	1.667	0
S9606_826	hsa-miR-6505-5p	NA	0	0	0	0	3	0	0	0	0	0	3	0	0	1	0	1
S9606_827	hsa-miR-365a-5p	NA	119	131	11	209	149	19	119	132	11	209	149	19	87	125.667	87.333	125.667
S9606_2151	hsa-miR-129-5p	NA	7	10	38	10	11	8	7	10	38	10	11	8	18.333	9.667	18.333	9.667
S9606_829	hsa-miR-539-3p	NA	183	141	29	227	215	37	183	141	30	227	215	37	117.667	159.667	118	159.667
S9606_830	hsa-miR-380-3p	NA	42	29	8	30	28	15	42	29	8	30	28	15	26.333	24.333	26.333	24.333
S9606_832	hsa-miR-548n	NA	4	2	2	6	5	2	4	2	2	6	5	2	2.667	4.333	2.667	4.333
S9606_2153	hsa-miR-9903	NA	0	0	0	0	1	0	0	0	0	0	1	0	0	0.333	0	0.333
S9606_2154	hsa-miR-4733-5p	NA	1	0	0	0	0	0	1	0	0	0	0	0	0.333	0	0.333	0
S9606_2156	hsa-miR-3136-3p	NA	0	0	0	2	1	2	0	0	0	2	1	2	0	1.667	0	1.667
S9606_836	hsa-miR-6805-5p	NA	3	1	0	0	4	1	3	1	0	0	4	1	1.333	1.667	1.333	1.667
S9606_2158	hsa-miR-182-5p	NA	77	156	50	171	85	96	77	157	50	171	86	98	94.333	117.333	94.667	118.333
S9606_838	hsa-miR-1245b-5p	NA	0	0	0	0	0	1	0	0	0	0	0	1	0	0.333	0	0.333
S9606_839	hsa-let-7e-3p	NA	498	519	95	615	399	63	501	529	95	619	400	63	370.667	359	375	360.667
S9606_840	hsa-miR-659-5p	NA	1	0	0	1	1	0	1	0	0	1	1	0	0.333	0.667	0.333	0.667
S9606_2160	hsa-miR-5588-5p	NA	0	0	1	0	0	0	0	0	1	0	0	0	0.333	0	0.333	0
S9606_841	hsa-miR-3191-5p	NA	1	1	0	4	0	0	1	1	0	4	0	0	0.667	1.333	0.667	1.333
S9606_843	hsa-miR-3180-3p	NA	85	89	7	129	108	11	85	89	7	129	108	11	60.333	82.667	60.333	82.667
S9606_842	hsa-miR-6886-3p	NA	2	0	0	0	2	0	2	0	0	0	2	0	0.667	0.667	0.667	0.667
S9606_847	hsa-miR-1288-3p	NA	2	4	0	1	0	2	2	4	0	1	0	2	2	1	2	1
S9606_848	hsa-miR-3679-5p	NA	56	55	2	61	27	6	56	55	2	61	27	6	37.667	31.333	37.667	31.333
S9606_2164	hsa-miR-411-3p	NA	43	41	6	57	56	14	43	41	6	57	56	14	30	42.333	30	42.333
S9606_851	hsa-miR-548c-5p	NA	0	1	0	0	1	0	0	1	0	0	1	0	0.333	0.333	0.333	0.333
S9606_2167	hsa-miR-6727-5p	NA	0	0	0	0	1	0	0	0	0	0	1	0	0	0.333	0	0.333
S9606_2169	hsa-miR-4672	NA	1	1	0	0	1	0	1	1	0	0	1	0	0.667	0.333	0.667	0.333
S9606_852	hsa-miR-128-1-5p	NA	3	5	3	3	3	0	3	5	3	3	3	0	3.667	2	3.667	2
S9606_2170	hsa-miR-4714-3p	NA	3	4	1	5	3	2	3	4	1	5	3	2	2.667	3.333	2.667	3.333
S9606_854	hsa-miR-664b-3p	NA	18	33	10	20	17	41	18	33	10	20	17	41	20.333	26	20.333	26
S9606_855	hsa-miR-15b-3p	NA	67	59	30	52	82	53	67	59	30	52	82	53	52	62.333	52	62.333
S9606_853	hsa-miR-7704	NA	7	1	9	2	0	15	7	1	9	2	0	15	5.667	5.667	5.667	5.667
S9606_2172	hsa-miR-3925-5p	NA	2	0	0	0	0	0	2	0	0	0	0	0	0.667	0	0.667	0
S9606_860	hsa-miR-196b-5p	NA	0	0	254	0	1	22	0	0	254	0	1	22	84.667	7.667	84.667	7.667
S9606_857	hsa-miR-4645-3p	NA	0	3	1	1	1	0	0	3	1	1	1	0	1.333	0.667	1.333	0.667
S9606_2174	hsa-miR-132-5p	NA	1777	1751	601	1450	1249	1249	1795	1768	604	1467	1257	1270	1376.33	1316	1389	1331.33
S9606_859	hsa-miR-181b-5p	NA	19427	22661	4678	22448	18877	8460	22606	26663	4850	26208	21547	9011	15588.7	16595	18039.7	18922
S9606_861	hsa-miR-219b-5p	NA	17	22	3	9	11	10	18	22	3	9	11	10	14	10	14.333	10
S9606_2176	hsa-miR-6509-5p	NA	1	0	0	2	0	1	1	0	0	2	0	1	0.333	1	0.333	1
S9606_865	hsa-miR-6791-5p	NA	0	1	0	0	0	0	0	1	0	0	0	0	0.333	0	0.333	0
S9606_866	hsa-miR-409-5p	NA	90	204	117	298	166	148	90	207	117	299	166	149	137	204	138	204.667
S9606_2179	hsa-miR-147b-3p	NA	1	1	3	0	2	2	1	1	3	0	2	2	1.667	1.333	1.667	1.333
S9606_2178	hsa-miR-1909-3p	NA	1	6	0	1	0	0	1	6	0	1	0	0	2.333	0.333	2.333	0.333
S9606_2180	hsa-miR-30c-5p	NA	218	226	278	462	158	365	221	227	280	462	158	367	240.667	328.333	242.667	329
S9606_868	hsa-miR-3909	NA	94	90	26	68	74	63	94	91	26	68	74	63	70	68.333	70.333	68.333
S9606_869	hsa-miR-4504	NA	0	0	0	0	1	0	0	0	0	0	1	0	0	0.333	0	0.333
S9606_870	hsa-miR-6850-5p	NA	5	1	0	3	1	2	5	1	0	3	1	2	2	2	2	2
S9606_2181	hsa-miR-455-5p	NA	532	573	132	526	464	228	536	573	133	528	466	229	412.333	406	414	407.667
S9606_2184	hsa-miR-5585-3p	NA	0	5	3	0	1	1	0	5	3	0	1	1	2.667	0.667	2.667	0.667
S9606_2188	hsa-miR-195-3p	NA	1	1	0	0	1	1	1	1	0	0	1	1	0.667	0.667	0.667	0.667
S9606_2189	hsa-miR-1303	NA	25	29	5	27	18	14	25	29	5	27	18	14	19.667	19.667	19.667	19.667
S9606_2190	hsa-miR-10392-5p	NA	1	0	0	2	0	0	1	0	0	2	0	0	0.333	0.667	0.333	0.667
S9606_2192	hsa-miR-4649-3p	NA	1	1	0	0	0	0	1	1	0	0	0	0	0.667	0	0.667	0
S9606_2193	hsa-miR-548aj-5p	NA	0	0	0	1	0	0	0	0	0	1	0	0	0	0.333	0	0.333
S9606_875	hsa-miR-624-5p	NA	4	13	7	16	16	13	4	13	7	16	16	13	8	15	8	15
S9606_877	hsa-miR-548ap-5p	NA	0	0	0	6	0	0	0	0	0	6	0	0	0	2	0	2
S9606_2194	hsa-miR-4747-3p	NA	3	1	0	1	0	0	3	1	0	1	0	0	1.333	0.333	1.333	0.333
S9606_879	hsa-miR-193b-5p	NA	449	587	38	497	365	67	451	592	38	500	365	67	358	309.667	360.333	310.667
S9606_878	hsa-miR-1304-5p	NA	29	28	3	24	11	0	29	28	3	24	11	0	20	11.667	20	11.667
S9606_2196	hsa-miR-1295a	NA	0	1	0	1	0	1	0	1	0	1	0	1	0.333	0.667	0.333	0.667
S9606_884	hsa-miR-550a-5p	NA	42	48	5	40	49	5	42	48	5	40	50	5	31.667	31.333	31.667	31.667
S9606_886	hsa-miR-1268b	NA	31	30	7	66	53	17	31	30	7	66	53	17	22.667	45.333	22.667	45.333
S9606_887	hsa-miR-3605-5p	NA	13	11	2	10	11	1	13	11	2	10	11	1	8.667	7.333	8.667	7.333
S9606_2197	hsa-miR-376b-5p	NA	568	345	186	549	381	318	572	347	187	552	383	320	366.333	416	368.667	418.333
S9606_889	hsa-miR-6857-5p	NA	0	1	0	1	2	0	0	1	0	1	2	0	0.333	1	0.333	1
S9606_2203	hsa-miR-6871-3p	NA	1	0	0	0	1	0	1	0	0	0	1	0	0.333	0.333	0.333	0.333
S9606_2204	hsa-miR-299-5p	NA	196	164	138	218	175	131	196	165	138	218	175	131	166	174.667	166.333	174.667
S9606_2207	hsa-miR-4470	NA	0	2	0	1	2	0	0	2	0	1	2	0	0.667	1	0.667	1
S9606_892	hsa-miR-30b-3p	NA	125	139	10	126	124	15	125	139	10	126	124	15	91.333	88.333	91.333	88.333
S9606_893	hsa-miR-4687-3p	NA	2	14	0	9	5	0	2	14	0	9	5	0	5.333	4.667	5.333	4.667
S9606_2211	hsa-miR-615-3p	NA	0	0	9	0	0	5	0	0	10	0	0	5	3	1.667	3.333	1.667
S9606_2212	hsa-miR-1185-2-3p	NA	35	45	7	107	46	0	35	45	7	107	46	0	29	51	29	51
S9606_896	hsa-miR-6727-3p	NA	0	0	0	1	0	0	0	0	0	1	0	0	0	0.333	0	0.333
S9606_2219	hsa-miR-4787-5p	NA	0	0	0	3	1	0	0	0	0	3	1	0	0	1.333	0	1.333
S9606_2218	hsa-miR-7977	NA	1	0	0	0	0	0	1	0	0	0	0	0	0.333	0	0.333	0
S9606_2222	hsa-miR-5581-3p	NA	2	3	1	5	7	1	2	3	1	5	7	1	2	4.333	2	4.333
S9606_2223	hsa-miR-10b-3p	NA	0	0	0	0	0	1	0	0	0	0	0	1	0	0.333	0	0.333
S9606_899	hsa-miR-29b-3p	NA	2610	2872	453	2744	3106	1039	2666	2945	456	2818	3191	1050	1978.33	2296.33	2022.33	2353
S9606_901	hsa-miR-6755-3p	NA	0	0	0	0	1	0	0	0	0	0	1	0	0	0.333	0	0.333
S9606_902	hsa-miR-4433b-5p	NA	0	0	0	0	0	86	0	0	0	0	0	86	0	28.667	0	28.667
S9606_2224	hsa-miR-454-5p	NA	24	21	4	17	23	5	24	21	4	17	23	5	16.333	15	16.333	15
S9606_2225	hsa-miR-10400-5p	NA	0	0	25	0	0	8	0	0	25	0	0	8	8.333	2.667	8.333	2.667
S9606_2226	hsa-miR-548ay-3p	NA	2	3	2	3	4	1	2	3	2	3	4	1	2.333	2.667	2.333	2.667
S9606_906	hsa-miR-6513-5p	NA	5	2	2	2	5	3	5	2	2	2	5	3	3	3.333	3	3.333
S9606_2228	hsa-miR-4451	NA	0	0	0	1	0	1	0	0	0	1	0	1	0	0.667	0	0.667
S9606_907	hsa-miR-6872-5p	NA	1	0	0	0	0	0	1	0	0	0	0	0	0.333	0	0.333	0
S9606_909	hsa-miR-431-5p	NA	7816	10642	1925	9550	10164	4825	8283	11467	1956	10217	10898	4992	6794.33	8179.67	7235.33	8702.33
S9606_912	hsa-miR-6516-3p	NA	0	0	1	0	0	0	0	0	1	0	0	0	0.333	0	0.333	0
S9606_910	hsa-miR-7974	NA	0	0	0	2	2	0	0	0	0	2	2	0	0	1.333	0	1.333
S9606_911	hsa-miR-6768-5p	NA	2	2	0	0	1	0	2	2	0	0	1	0	1.333	0.333	1.333	0.333
S9606_914	hsa-miR-200b-3p	NA	6	1	2	7	1	9	6	1	2	7	1	9	3	5.667	3	5.667
S9606_913	hsa-miR-548ar-5p	NA	1	2	0	0	1	1	1	2	0	0	1	1	1	0.667	1	0.667
S9606_915	hsa-miR-1249-5p	NA	10	16	0	16	13	2	10	16	0	16	13	2	8.667	10.333	8.667	10.333
S9606_918	hsa-miR-1305	NA	4	3	0	1	2	0	4	3	0	1	2	0	2.333	1	2.333	1
S9606_2231	hsa-miR-337-3p	NA	19735	21034	4506	24534	18388	5690	23080	24543	4674	29232	20961	5928	15091.7	16204	17432.3	18707
S9606_2230	hsa-miR-92a-3p	NA	20685	25787	8491	25162	18232	13503	24596	31255	9020	30323	20864	14842	18321	18965.7	21623.7	22009.7
S9606_2232	hsa-miR-6852-5p	NA	8	6	6	9	3	4	8	6	6	9	3	4	6.667	5.333	6.667	5.333
S9606_919	hsa-miR-937-3p	NA	29	23	1	21	22	13	29	23	1	21	22	13	17.667	18.667	17.667	18.667
S9606_920	hsa-miR-432-3p	NA	43	38	17	48	46	23	43	38	17	48	46	24	32.667	39	32.667	39.333
S9606_921	hsa-miR-6870-3p	NA	0	1	0	0	0	1	0	1	0	0	0	1	0.333	0.333	0.333	0.333
S9606_2235	hsa-miR-660-5p	NA	498	490	133	578	471	238	502	492	133	581	474	238	373.667	429	375.667	431
S9606_924	hsa-miR-550b-3p	NA	0	1	1	1	0	3	0	1	1	1	0	3	0.667	1.333	0.667	1.333
S9606_928	hsa-miR-421	NA	876	1080	146	1218	1112	122	885	1092	147	1231	1123	122	700.667	817.333	708	825.333
S9606_927	hsa-miR-3180	NA	13	25	0	8	12	7	13	25	0	8	12	7	12.667	9	12.667	9
S9606_929	hsa-miR-151a-5p	NA	26811	28296	10035	25857	20252	18612	33172	34854	10741	31235	23465	21096	21714	21573.7	26255.7	25265.3
S9606_930	hsa-miR-378g	NA	1	0	0	1	0	1	1	0	0	1	0	1	0.333	0.667	0.333	0.667
S9606_2239	hsa-miR-4533	NA	0	1	0	0	0	0	0	1	0	0	0	0	0.333	0	0.333	0
S9606_931	hsa-miR-29a-5p	NA	50	34	38	43	42	61	50	34	38	43	42	61	40.667	48.667	40.667	48.667
S9606_933	hsa-miR-6894-3p	NA	1	0	0	0	1	2	1	0	0	0	1	2	0.333	1	0.333	1
S9606_2243	hsa-miR-151a-3p	NA	977	1057	300	1356	1149	643	988	1076	303	1371	1161	649	778	1049.33	789	1060.33
S9606_2241	hsa-miR-3941	NA	1	0	0	0	0	1	1	0	0	0	0	1	0.333	0.333	0.333	0.333
S9606_2242	hsa-miR-3155b	NA	1	0	0	0	0	1	1	0	0	0	0	1	0.333	0.333	0.333	0.333
S9606_2244	hsa-miR-12136	NA	2071	2464	580	4437	4477	972	2109	2508	586	4594	4634	982	1705	3295.33	1734.33	3403.33
S9606_2246	hsa-miR-200c-5p	NA	0	0	0	1	0	0	0	0	0	1	0	0	0	0.333	0	0.333
S9606_937	hsa-miR-4788	NA	0	0	0	1	0	0	0	0	0	1	0	0	0	0.333	0	0.333
S9606_2248	hsa-miR-26b-3p	NA	37	18	17	35	23	51	37	18	17	35	23	51	24	36.333	24	36.333
S9606_2250	hsa-miR-1468-5p	NA	3	3	3	7	0	7	3	3	3	7	0	7	3	4.667	3	4.667
S9606_938	hsa-miR-590-5p	NA	52	52	10	66	78	15	52	52	10	66	78	15	38	53	38	53
S9606_2252	hsa-miR-523-5p	NA	1	0	0	0	0	0	1	0	0	0	0	0	0.333	0	0.333	0
S9606_2254	hsa-miR-4796-3p	NA	0	1	0	0	0	0	0	1	0	0	0	0	0.333	0	0.333	0
S9606_2256	hsa-miR-582-3p	NA	1	1	0	1	0	0	1	1	0	1	0	0	0.667	0.333	0.667	0.333
S9606_943	hsa-miR-148a-3p	NA	1	3	12	3	5	25	1	3	12	3	5	25	5.333	11	5.333	11
S9606_2257	hsa-miR-4433a-3p	NA	0	0	23	0	0	0	0	0	23	0	0	0	7.667	0	7.667	0
S9606_2258	hsa-miR-106b-3p	NA	10	3	2	11	10	5	10	3	2	11	10	5	5	8.667	5	8.667
S9606_947	hsa-miR-4482-3p	NA	0	0	0	0	0	2	0	0	0	0	0	2	0	0.667	0	0.667
S9606_948	hsa-miR-412-5p	NA	3601	3388	730	4752	4453	1525	3711	3476	734	4935	4588	1532	2573	3576.67	2640.33	3685
S9606_949	hsa-miR-6851-3p	NA	2	2	0	0	0	1	2	2	0	0	0	1	1.333	0.333	1.333	0.333
S9606_2262	hsa-miR-433-5p	NA	46	43	22	53	40	10	46	43	22	53	40	10	37	34.333	37	34.333
S9606_951	hsa-miR-570-3p	NA	17	23	3	29	30	4	17	23	3	29	30	4	14.333	21	14.333	21
S9606_2263	hsa-miR-1269b	NA	4	3	0	4	1	4	4	3	0	4	1	4	2.333	3	2.333	3
S9606_953	hsa-miR-6736-3p	NA	0	1	0	0	0	0	0	1	0	0	0	0	0.333	0	0.333	0
S9606_2265	hsa-miR-942-5p	NA	10	17	4	11	18	19	10	17	4	11	18	19	10.333	16	10.333	16
S9606_955	hsa-miR-3135a	NA	0	0	0	0	0	1	0	0	0	0	0	1	0	0.333	0	0.333
S9606_954	hsa-miR-4757-5p	NA	0	0	1	0	1	1	0	0	1	0	1	1	0.333	0.667	0.333	0.667
S9606_2267	hsa-miR-129-2-3p	NA	2	1	3	0	1	1	2	1	4	0	1	1	2	0.667	2.333	0.667
S9606_957	hsa-miR-324-3p	NA	151	224	96	183	163	166	151	224	97	186	163	166	157	170.667	157.333	171.667
S9606_2268	hsa-miR-6739-3p	NA	1	0	0	0	0	0	1	0	0	0	0	0	0.333	0	0.333	0
S9606_2269	hsa-miR-3177-5p	NA	9	13	1	10	11	1	9	13	1	10	11	1	7.667	7.333	7.667	7.333
S9606_2270	hsa-miR-4492	NA	4	6	14	1	0	18	4	6	14	1	0	18	8	6.333	8	6.333
S9606_960	hsa-miR-7156-3p	NA	7	12	6	6	6	7	7	12	6	6	6	7	8.333	6.333	8.333	6.333
S9606_2272	hsa-miR-3126-3p	NA	12	16	3	14	11	5	12	16	3	14	11	5	10.333	10	10.333	10
S9606_2274	hsa-miR-5001-3p	NA	4	4	4	6	7	4	4	4	4	6	7	4	4	5.667	4	5.667
S9606_2275	hsa-miR-3145-3p	NA	0	0	0	2	1	0	0	0	0	2	1	0	0	1	0	1
S9606_965	hsa-miR-6775-5p	NA	0	0	0	0	2	0	0	0	0	0	2	0	0	0.667	0	0.667
S9606_2276	hsa-miR-7109-3p	NA	1	0	0	0	0	0	1	0	0	0	0	0	0.333	0	0.333	0
S9606_966	hsa-miR-6748-5p	NA	0	4	0	0	0	0	0	4	0	0	0	0	1.333	0	1.333	0
S9606_2277	hsa-miR-4670-5p	NA	0	0	2	0	0	0	0	0	2	0	0	0	0.667	0	0.667	0
S9606_967	hsa-miR-1273h-3p	NA	0	0	1	0	0	10	0	0	1	0	0	10	0.333	3.333	0.333	3.333
S9606_968	hsa-miR-31-3p	NA	4271	4792	1431	3838	4046	2617	4415	4954	1442	3941	4159	2661	3498	3500.33	3603.67	3587
S9606_2278	hsa-miR-98-5p	NA	13521	8990	4970	13151	10128	6994	15011	9560	5148	14314	10920	7319	9160.33	10091	9906.33	10851
S9606_2279	hsa-miR-6827-5p	NA	1	0	1	1	0	1	1	0	1	1	0	1	0.667	0.667	0.667	0.667
S9606_2280	hsa-miR-29a-3p	NA	25504	23959	12092	26637	26735	20581	31339	28336	13174	32150	32303	23693	20518.3	24651	24283	29382
S9606_2282	hsa-miR-362-5p	NA	1288	1173	232	1400	1073	418	1311	1188	234	1419	1084	420	897.667	963.667	911	974.333
S9606_2283	hsa-miR-1286	NA	0	1	0	1	0	0	0	1	0	1	0	0	0.333	0.333	0.333	0.333
S9606_2284	hsa-miR-549a-5p	NA	633	639	258	790	460	684	637	645	260	791	463	686	510	644.667	514	646.667
S9606_2285	hsa-miR-505-3p	NA	109	135	69	186	137	193	109	138	69	188	137	194	104.333	172	105.333	173
S9606_976	hsa-miR-7156-5p	NA	9	4	1	10	6	0	9	4	1	10	6	0	4.667	5.333	4.667	5.333
S9606_978	hsa-miR-6780a-5p	NA	1	0	0	0	0	0	1	0	0	0	0	0	0.333	0	0.333	0
S9606_977	hsa-miR-6802-3p	NA	0	1	0	2	1	2	0	1	0	2	1	2	0.333	1.667	0.333	1.667
S9606_2288	hsa-miR-15a-5p	NA	4070	4030	1137	5041	4797	2197	4198	4159	1153	5214	4937	2219	3079	4011.67	3170	4123.33
S9606_979	hsa-miR-484	NA	2424	2584	600	2460	1854	1670	2488	2640	604	2500	1874	1693	1869.33	1994.67	1910.67	2022.33
S9606_2290	hsa-miR-642b-5p	NA	0	5	0	1	0	1	0	5	0	1	0	1	1.667	0.667	1.667	0.667
S9606_981	hsa-miR-382-3p	NA	336	357	227	447	318	393	338	359	228	448	319	395	306.667	386	308.333	387.333
S9606_980	hsa-miR-6770-5p	NA	1	10	0	4	3	3	1	10	0	4	3	3	3.667	3.333	3.667	3.333
S9606_2291	hsa-miR-550a-3-5p	NA	3	0	2	0	1	0	3	0	2	0	1	0	1.667	0.333	1.667	0.333
S9606_2293	hsa-miR-3622b-5p	NA	0	0	0	0	0	1	0	0	0	0	0	1	0	0.333	0	0.333
S9606_983	hsa-miR-4701-5p	NA	1	6	2	2	2	2	1	6	2	2	2	2	3	2	3	2
S9606_2294	hsa-miR-6777-5p	NA	3	0	0	0	0	0	3	0	0	0	0	0	1	0	1	0
S9606_984	hsa-miR-6848-5p	NA	1	2	1	5	2	1	1	2	1	5	2	1	1.333	2.667	1.333	2.667
S9606_2298	hsa-miR-432-5p	NA	7942	7356	1516	10634	8120	2587	8461	7731	1534	11470	8605	2638	5604.67	7113.67	5908.67	7571
S9606_2299	hsa-miR-204-3p	NA	2	1	0	2	1	0	2	1	0	2	1	0	1	1	1	1
S9606_985	hsa-miR-6724-5p	NA	15	21	8	9	17	11	15	21	8	9	17	11	14.667	12.333	14.667	12.333
S9606_986	hsa-miR-124-3p	NA	20	34	4	25	26	6	20	34	4	25	26	6	19.333	19	19.333	19
S9606_987	hsa-miR-3923	NA	0	0	0	0	1	0	0	0	0	0	1	0	0	0.333	0	0.333
S9606_988	hsa-miR-4422	NA	0	0	1	0	0	0	0	0	1	0	0	0	0.333	0	0.333	0
S9606_2302	hsa-miR-1913	NA	8	10	0	4	5	0	8	10	0	4	5	0	6	3	6	3
S9606_2305	hsa-miR-6886-5p	NA	1	5	1	7	7	1	1	5	1	7	7	1	2.333	5	2.333	5
S9606_993	hsa-miR-4676-5p	NA	3	5	2	2	1	0	3	5	2	2	1	0	3.333	1	3.333	1
S9606_995	hsa-miR-320d	NA	10	16	7	16	5	7	10	16	7	16	5	7	11	9.333	11	9.333
S9606_997	hsa-miR-3620-5p	NA	0	1	0	1	8	0	0	1	0	1	8	0	0.333	3	0.333	3
S9606_998	hsa-miR-95-3p	NA	4	2	0	1	2	1	4	2	0	1	2	1	2	1.333	2	1.333
S9606_1000	hsa-miR-4688	NA	0	0	0	1	1	1	0	0	0	1	1	1	0	1	0	1
S9606_1001	hsa-miR-222-3p	NA	129658	138125	63435	136247	134780	57983	722220	860149	108478	748585	727582	92807	110406	109670	563616	522991
S9606_1003	hsa-miR-6865-3p	NA	0	0	0	1	0	0	0	0	0	1	0	0	0	0.333	0	0.333
S9606_2311	hsa-miR-3176	NA	22	15	2	14	16	11	22	15	2	14	16	11	13	13.667	13	13.667
S9606_2312	hsa-miR-6824-3p	NA	2	3	2	2	5	2	2	3	2	2	5	2	2.333	3	2.333	3
S9606_1006	hsa-miR-4796-5p	NA	0	0	0	2	1	1	0	0	0	2	1	1	0	1.333	0	1.333
S9606_2315	hsa-miR-1180-3p	NA	2902	3618	463	3492	2777	1322	2974	3711	468	3594	2835	1332	2327.67	2530.33	2384.33	2587
S9606_2318	hsa-miR-3944-5p	NA	7	5	0	8	3	3	7	5	0	8	3	3	4	4.667	4	4.667
S9606_2320	hsa-miR-548at-5p	NA	7	7	3	12	15	8	7	7	3	12	15	8	5.667	11.667	5.667	11.667
S9606_2319	hsa-miR-664a-3p	NA	200	185	159	233	117	259	202	185	159	233	117	260	181.333	203	182	203.333
S9606_2321	hsa-miR-143-5p	NA	2	0	1	6	1	2	2	0	1	6	1	2	1	3	1	3
S9606_2324	hsa-miR-4753-5p	NA	2	1	0	0	0	1	2	1	0	0	0	1	1	0.333	1	0.333
S9606_2323	hsa-miR-383-5p	NA	75	92	43	84	74	67	75	93	45	85	74	67	70	75	71	75.333
S9606_2325	hsa-miR-6885-5p	NA	0	0	0	0	1	0	0	0	0	0	1	0	0	0.333	0	0.333
S9606_2326	hsa-miR-503-5p	NA	229	288	41	364	410	67	229	288	41	364	411	67	186	280.333	186	280.667
S9606_1011	hsa-miR-34c-3p	NA	828	929	193	794	771	448	835	935	195	801	777	449	650	671	655	675.667
S9606_2327	hsa-miR-6875-5p	NA	0	2	1	0	3	0	0	2	1	0	3	0	1	1	1	1
S9606_1014	hsa-miR-6771-5p	NA	0	1	0	0	0	0	0	1	0	0	0	0	0.333	0	0.333	0
S9606_1015	hsa-miR-6875-3p	NA	0	0	0	0	0	2	0	0	0	0	0	2	0	0.667	0	0.667
S9606_2328	hsa-miR-1234-3p	NA	2	0	0	1	1	0	2	0	0	1	1	0	0.667	0.667	0.667	0.667
S9606_2330	hsa-miR-6779-5p	NA	1	2	0	0	0	0	1	2	0	0	0	0	1	0	1	0
S9606_1018	hsa-miR-6789-3p	NA	3	1	0	2	4	0	3	1	0	2	4	0	1.333	2	1.333	2
S9606_1019	hsa-miR-134-3p	NA	125	140	11	102	84	26	125	140	11	102	84	26	92	70.667	92	70.667
S9606_2331	hsa-miR-1233-3p	NA	0	0	0	2	2	0	0	0	0	2	2	0	0	1.333	0	1.333
S9606_1022	hsa-miR-193a-3p	NA	289	182	47	363	250	85	291	182	47	364	252	85	172.667	232.667	173.333	233.667
S9606_1023	hsa-miR-1185-5p	NA	282	200	137	271	226	330	283	200	139	274	228	330	206.333	275.667	207.333	277.333
S9606_2335	hsa-miR-6501-3p	NA	0	0	0	1	2	1	0	0	0	1	2	1	0	1.333	0	1.333
S9606_1024	hsa-miR-6847-5p	NA	0	0	0	3	0	0	0	0	0	3	0	0	0	1	0	1
S9606_2336	hsa-miR-1260b	NA	27	25	4	17	9	11	27	25	4	17	9	11	18.667	12.333	18.667	12.333
S9606_1027	hsa-miR-6833-3p	NA	0	0	0	0	0	1	0	0	0	0	0	1	0	0.333	0	0.333
S9606_1028	hsa-miR-1277-3p	NA	40	37	6	29	20	18	40	37	6	29	20	18	27.667	22.333	27.667	22.333
S9606_1030	hsa-miR-1538	NA	0	1	0	1	2	0	0	1	0	1	2	0	0.333	1	0.333	1
S9606_2340	hsa-miR-1243	NA	0	0	0	3	1	0	0	0	0	3	1	0	0	1.333	0	1.333
S9606_1032	hsa-miR-30c-2-3p	NA	189	162	31	138	108	47	190	162	31	139	108	47	127.333	97.667	127.667	98
S9606_1034	hsa-miR-30e-3p	NA	162	114	73	235	180	116	162	114	73	237	180	117	116.333	177	116.333	178
S9606_1035	hsa-miR-149-5p	NA	5224	6806	987	5499	4486	495	5434	7120	995	5729	4647	501	4339	3493.33	4516.33	3625.67
S9606_1037	hsa-miR-3198	NA	3	1	0	5	6	0	3	1	0	5	6	0	1.333	3.667	1.333	3.667
S9606_1039	hsa-miR-221-3p	NA	35455	37062	15815	39821	36467	9092	47049	49291	17773	53706	47736	9729	29444	28460	38037.7	37057
S9606_1041	hsa-miR-3139	NA	0	1	0	3	0	0	0	1	0	3	0	0	0.333	1	0.333	1
S9606_2350	hsa-miR-449b-5p	NA	0	1	0	0	1	0	0	1	0	0	1	0	0.333	0.333	0.333	0.333
S9606_2351	hsa-miR-4636	NA	70	59	21	51	73	43	70	59	21	51	73	43	50	55.667	50	55.667
S9606_1045	hsa-miR-652-3p	NA	1107	1211	588	1448	1093	1660	1120	1224	591	1465	1097	1675	968.667	1400.33	978.333	1412.33
S9606_2356	hsa-miR-1262	NA	6	7	0	7	4	3	6	7	0	7	4	3	4.333	4.667	4.333	4.667
S9606_1054	hsa-miR-4662a-5p	NA	1	1	4	3	1	14	1	1	4	3	1	14	2	6	2	6
S9606_2357	hsa-miR-4795-3p	NA	0	2	0	0	0	0	0	2	0	0	0	0	0.667	0	0.667	0
S9606_2358	hsa-miR-374b-5p	NA	1593	361	380	2392	1812	1711	1618	364	380	2434	1837	1734	778	1971.67	787.333	2001.67
S9606_2359	hsa-miR-29c-5p	NA	55	65	24	44	53	39	55	65	24	44	53	39	48	45.333	48	45.333
S9606_2360	hsa-miR-30c-1-3p	NA	95	88	13	92	91	7	95	88	13	92	92	7	65.333	63.333	65.333	63.667
S9606_2362	hsa-miR-616-3p	NA	0	1	1	2	1	1	0	1	1	2	1	1	0.667	1.333	0.667	1.333
S9606_2361	hsa-miR-548w	NA	4	1	1	1	2	0	4	1	1	1	2	0	2	1	2	1
S9606_1057	hsa-miR-585-5p	NA	4	2	1	1	1	0	4	2	1	1	1	0	2.333	0.667	2.333	0.667
S9606_1058	hsa-miR-212-3p	NA	476	551	118	545	438	221	477	555	118	551	439	224	381.667	401.333	383.333	404.667
S9606_2365	hsa-miR-561-5p	NA	8	11	2	8	7	1	8	11	2	8	7	1	7	5.333	7	5.333
S9606_1060	hsa-miR-10396b-5p	NA	1	0	3	2	0	0	1	0	3	2	0	0	1.333	0.667	1.333	0.667
S9606_2364	hsa-miR-4445-5p	NA	2	1	1	3	0	0	2	1	1	3	0	0	1.333	1	1.333	1
S9606_1062	hsa-miR-6764-3p	NA	1	0	0	0	0	0	1	0	0	0	0	0	0.333	0	0.333	0
S9606_1063	hsa-miR-3158-3p	NA	3	1	0	2	1	0	3	1	0	2	1	0	1.333	1	1.333	1
S9606_2366	hsa-miR-4786-3p	NA	0	1	0	0	0	0	0	1	0	0	0	0	0.333	0	0.333	0
S9606_2367	hsa-miR-23b-5p	NA	346	408	45	409	314	67	346	413	45	411	314	67	266.333	263.333	268	264
S9606_2369	hsa-miR-125b-5p	NA	20904	27366	18506	79252	23476	33153	24431	33379	21052	154563	27615	42022	22258.7	45293.7	26287.3	74733.3
S9606_1069	hsa-miR-592	NA	2	0	0	3	2	1	2	0	0	3	2	1	0.667	2	0.667	2
S9606_1071	hsa-miR-6741-5p	NA	1	2	0	3	0	2	1	2	0	3	0	2	1	1.667	1	1.667
S9606_2372	hsa-miR-3651	NA	0	0	0	0	0	4	0	0	0	0	0	4	0	1.333	0	1.333
S9606_2371	hsa-miR-6804-5p	NA	1	1	0	1	0	0	1	1	0	1	0	0	0.667	0.333	0.667	0.333
S9606_2373	hsa-miR-545-5p	NA	1	2	0	1	0	1	1	2	0	1	0	1	1	0.667	1	0.667
S9606_1077	hsa-miR-940	NA	339	401	84	349	87	117	339	407	84	349	87	117	274.667	184.333	276.667	184.333
S9606_2379	hsa-miR-302c-3p	NA	100	79	40	101	105	67	100	79	40	102	105	68	73	91	73	91.667
S9606_2381	hsa-miR-671-3p	NA	32	35	11	39	40	14	32	36	11	39	40	14	26	31	26.333	31
S9606_2383	hsa-miR-545-3p	NA	9	8	1	11	12	0	9	9	1	11	12	0	6	7.667	6.333	7.667
S9606_2384	hsa-miR-184	NA	9	7	2	4	0	1	9	7	2	4	0	1	6	1.667	6	1.667
S9606_1084	hsa-miR-146a-3p	NA	0	0	1	0	0	1	0	0	1	0	0	1	0.333	0.333	0.333	0.333
S9606_1085	hsa-miR-449c-5p	NA	0	2	0	2	1	1	0	2	0	2	1	1	0.667	1.333	0.667	1.333
S9606_2387	hsa-miR-7151-3p	NA	0	1	0	0	0	0	0	1	0	0	0	0	0.333	0	0.333	0
S9606_2386	hsa-miR-93-3p	NA	19	26	16	24	19	11	19	26	16	24	19	11	20.333	18	20.333	18
S9606_2389	hsa-miR-135b-5p	NA	343	313	118	446	297	276	345	316	120	450	298	279	258	339.667	260.333	342.333
S9606_1087	hsa-miR-6800-3p	NA	0	0	0	2	3	0	0	0	0	2	3	0	0	1.667	0	1.667
S9606_2392	hsa-miR-548j-3p	NA	0	0	0	0	0	1	0	0	0	0	0	1	0	0.333	0	0.333
S9606_1089	hsa-miR-3913-3p	NA	1	1	0	1	1	3	1	1	0	1	1	3	0.667	1.667	0.667	1.667
S9606_2391	hsa-miR-195-5p	NA	21	14	14	40	15	26	21	14	14	40	15	26	16.333	27	16.333	27
S9606_2393	hsa-miR-125a-3p	NA	154	142	54	233	172	96	154	142	54	233	173	96	116.667	167	116.667	167.333
S9606_1093	hsa-miR-548av-3p	NA	4	6	0	2	2	3	4	6	0	2	2	3	3.333	2.333	3.333	2.333
S9606_2395	hsa-miR-328-5p	NA	0	0	1	1	1	0	0	0	1	1	1	0	0.333	0.667	0.333	0.667
S9606_1094	hsa-miR-5701	NA	1	0	0	0	1	0	1	0	0	0	1	0	0.333	0.333	0.333	0.333
S9606_1095	hsa-miR-450b-3p	NA	0	1	0	0	0	0	0	1	0	0	0	0	0.333	0	0.333	0
S9606_1098	hsa-miR-3187-5p	NA	0	0	0	2	2	1	0	0	0	2	2	1	0	1.667	0	1.667
S9606_2399	hsa-let-7a-2-3p	NA	228	304	38	236	258	38	230	305	38	237	260	38	190	177.333	191	178.333
S9606_1099	hsa-miR-6820-5p	NA	3	2	1	4	5	0	3	2	1	4	5	0	2	3	2	3
S9606_2400	hsa-miR-6819-3p	NA	3	6	0	7	5	7	3	6	0	7	5	7	3	6.333	3	6.333
S9606_2401	hsa-miR-224-3p	NA	3	5	1	10	5	2	3	5	1	10	5	2	3	5.667	3	5.667
S9606_1101	hsa-miR-3121-3p	NA	2	8	0	2	0	0	2	8	0	2	0	0	3.333	0.667	3.333	0.667
S9606_2406	hsa-miR-450b-5p	NA	34	16	12	39	35	16	34	16	12	39	35	16	20.667	30	20.667	30
S9606_2407	hsa-miR-4704-5p	NA	1	2	0	1	1	0	1	2	0	1	1	0	1	0.667	1	0.667
S9606_2408	hsa-miR-6894-5p	NA	0	1	0	1	1	0	0	1	0	1	1	0	0.333	0.667	0.333	0.667
S9606_2411	hsa-miR-4683	NA	0	5	4	1	4	9	0	5	4	1	4	9	3	4.667	3	4.667
S9606_1103	hsa-miR-452-5p	NA	38	34	29	94	39	80	38	34	29	94	39	81	33.667	71	33.667	71.333
S9606_2417	hsa-miR-1228-5p	NA	186	195	16	165	112	15	186	197	16	165	112	15	132.333	97.333	133	97.333
S9606_2416	hsa-miR-3654	NA	0	2	0	0	0	0	0	2	0	0	0	0	0.667	0	0.667	0
S9606_2418	hsa-miR-7114-3p	NA	0	0	0	1	0	0	0	0	0	1	0	0	0	0.333	0	0.333
S9606_1104	hsa-miR-642a-5p	NA	64	66	32	55	47	40	64	67	32	55	47	40	54	47.333	54.333	47.333
S9606_1108	hsa-miR-6753-3p	NA	0	0	1	0	0	0	0	0	1	0	0	0	0.333	0	0.333	0
S9606_2419	hsa-miR-299-3p	NA	1129	1254	273	1032	921	357	1149	1267	276	1045	931	357	885.333	770	897.333	777.667
S9606_2420	hsa-miR-636	NA	6	5	1	0	4	2	6	5	1	0	4	2	4	2	4	2
S9606_1114	hsa-miR-6783-5p	NA	1	0	0	1	0	0	1	0	0	1	0	0	0.333	0.333	0.333	0.333
S9606_1116	hsa-miR-580-3p	NA	0	1	1	0	0	0	0	1	1	0	0	0	0.667	0	0.667	0
S9606_2424	hsa-miR-6834-5p	NA	0	0	0	2	0	0	0	0	0	2	0	0	0	0.667	0	0.667
S9606_2425	hsa-miR-3174	NA	1	1	0	2	3	0	1	1	0	2	3	0	0.667	1.667	0.667	1.667
S9606_1119	hsa-miR-6881-5p	NA	0	2	0	1	4	0	0	2	0	1	4	0	0.667	1.667	0.667	1.667
S9606_1120	hsa-miR-25-5p	NA	26	53	15	56	28	44	26	53	16	56	28	44	31.333	42.667	31.667	42.667
S9606_1121	hsa-miR-137-3p	NA	2612	2446	894	2669	2629	1066	2673	2489	901	2716	2670	1075	1984	2121.33	2021	2153.67
S9606_2429	hsa-miR-6823-5p	NA	1	4	0	3	0	0	1	4	0	3	0	0	1.667	1	1.667	1
S9606_2430	hsa-miR-3939	NA	2	3	1	4	4	1	2	3	1	4	4	1	2	3	2	3
S9606_2432	hsa-miR-424-5p	NA	3865	4423	944	4624	3382	1746	4003	4565	959	4760	3473	1775	3077.33	3250.67	3175.67	3336
S9606_2434	hsa-miR-194-5p	NA	130	193	66	281	194	148	130	193	66	282	194	148	129.667	207.667	129.667	208
S9606_2437	hsa-miR-1322	NA	0	4	0	0	0	0	0	4	0	0	0	0	1.333	0	1.333	0
S9606_1126	hsa-miR-4798-5p	NA	1	0	0	0	2	0	1	0	0	0	2	0	0.333	0.667	0.333	0.667
S9606_2439	hsa-miR-5189-3p	NA	1	0	0	1	1	0	1	0	0	1	1	0	0.333	0.667	0.333	0.667
S9606_2438	hsa-miR-6842-3p	NA	13	14	4	11	20	17	13	14	4	11	20	17	10.333	16	10.333	16
S9606_1127	hsa-miR-148a-5p	NA	0	0	0	0	0	2	0	0	0	0	0	2	0	0.667	0	0.667
S9606_2440	hsa-miR-4742-3p	NA	0	4	2	12	4	7	0	4	2	12	4	7	2	7.667	2	7.667
S9606_2441	hsa-miR-190b-5p	NA	20	22	20	24	21	29	20	22	20	24	21	29	20.667	24.667	20.667	24.667
S9606_2445	hsa-miR-3944-3p	NA	4	2	0	0	3	2	4	2	0	0	3	2	2	1.667	2	1.667
S9606_2447	hsa-miR-548aw	NA	3	0	0	0	0	1	3	0	0	0	0	1	1	0.333	1	0.333
S9606_2451	hsa-miR-548a-3p	NA	1	0	0	0	0	1	1	0	0	0	0	1	0.333	0.333	0.333	0.333
S9606_2453	hsa-miR-4440	NA	7	8	0	7	8	5	7	8	0	7	8	5	5	6.667	5	6.667
S9606_2455	hsa-miR-1255a	NA	12	6	1	9	6	1	12	6	1	9	6	1	6.333	5.333	6.333	5.333
S9606_2456	hsa-miR-7976	NA	1	0	3	4	3	4	1	0	3	4	3	4	1.333	3.667	1.333	3.667
S9606_1133	hsa-miR-99b-5p	NA	37024	52121	9208	39840	34968	22795	49899	78720	9874	53499	45095	26844	32784.3	32534.3	46164.3	41812.7
S9606_1134	hsa-miR-548au-5p	NA	0	1	1	0	3	0	0	1	1	0	3	0	0.667	1	0.667	1
S9606_1135	hsa-miR-494-3p	NA	400	346	107	557	436	181	401	347	108	560	439	181	284.333	391.333	285.333	393.333
S9606_1138	hsa-miR-221-5p	NA	176	118	121	201	162	413	176	119	122	202	163	415	138.333	258.667	139	260
S9606_2460	hsa-miR-4727-5p	NA	0	1	0	0	0	0	0	1	0	0	0	0	0.333	0	0.333	0
S9606_1142	hsa-miR-548at-3p	NA	0	1	0	2	1	2	0	1	0	2	1	2	0.333	1.667	0.333	1.667
S9606_1144	hsa-miR-3664-3p	NA	0	2	1	2	1	1	0	2	1	2	1	1	1	1.333	1	1.333
S9606_1145	hsa-miR-551a	NA	1	0	1	3	2	5	1	0	1	3	2	5	0.667	3.333	0.667	3.333
S9606_1148	hsa-miR-4749-5p	NA	0	1	0	2	0	0	0	1	0	2	0	0	0.333	0.667	0.333	0.667
S9606_1149	hsa-miR-7844-5p	NA	0	0	0	0	0	1	0	0	0	0	0	1	0	0.333	0	0.333
S9606_2464	hsa-miR-4660	NA	0	0	0	1	1	0	0	0	0	1	1	0	0	0.667	0	0.667
S9606_2465	hsa-miR-619-5p	NA	4	11	18	3	4	10	4	11	18	3	4	10	11	5.667	11	5.667
S9606_2466	hsa-miR-6838-3p	NA	0	0	0	0	1	0	0	0	0	0	1	0	0	0.333	0	0.333
S9606_1153	hsa-miR-215-5p	NA	0	0	1	0	2	1	0	0	1	0	2	1	0.333	1	0.333	1
S9606_1154	hsa-miR-1292-5p	NA	16	21	2	18	22	13	16	21	2	18	22	13	13	17.667	13	17.667
S9606_1156	hsa-miR-605-5p	NA	0	1	0	0	0	2	0	1	0	0	0	2	0.333	0.667	0.333	0.667
S9606_2469	hsa-miR-550a-3p	NA	1	0	0	0	0	0	1	0	0	0	0	0	0.333	0	0.333	0
S9606_2470	hsa-miR-3144-3p	NA	0	0	0	0	0	1	0	0	0	0	0	1	0	0.333	0	0.333
S9606_1162	hsa-miR-150-5p	NA	12	9	1373	12	10	6035	12	9	1389	12	10	6288	464.667	2019	470	2103.33
S9606_1163	hsa-miR-361-3p	NA	8	8	12	7	6	27	9	8	12	7	6	28	9.333	13.333	9.667	13.667
S9606_1165	hsa-miR-4446-3p	NA	0	0	0	0	0	15	0	0	0	0	0	15	0	5	0	5
S9606_2472	hsa-let-7e-5p	NA	32820	26541	10014	34410	26404	15614	41921	32137	10779	44565	31827	17399	23125	25476	28279	31263.7
S9606_2471	hsa-miR-3127-3p	NA	3	2	0	1	0	3	3	2	0	1	0	3	1.667	1.333	1.667	1.333
S9606_1167	hsa-miR-628-5p	NA	59	20	19	71	41	61	59	20	19	71	41	61	32.667	57.667	32.667	57.667
S9606_2479	hsa-let-7f-1-3p	NA	0	1	0	0	1	0	0	1	0	0	1	0	0.333	0.333	0.333	0.333
S9606_1168	hsa-miR-100-3p	NA	277	212	25	177	232	25	278	212	25	177	234	25	171.333	144.667	171.667	145.333
S9606_2481	hsa-miR-760	NA	36	41	8	49	59	19	36	41	8	49	59	19	28.333	42.333	28.333	42.333
S9606_2483	hsa-let-7c-3p	NA	1	4	2	6	2	1	1	4	2	6	2	1	2.333	3	2.333	3
S9606_1173	hsa-miR-323a-5p	NA	176	199	19	201	206	25	177	199	19	202	207	25	131.333	144	131.667	144.667
S9606_1171	hsa-miR-6777-3p	NA	1	3	0	1	0	0	1	4	0	1	0	0	1.333	0.333	1.667	0.333
S9606_1174	hsa-miR-345-5p	NA	472	709	119	447	517	185	477	711	119	454	519	185	433.333	383	435.667	386
S9606_1175	hsa-miR-877-5p	NA	538	607	38	816	382	108	541	608	38	822	383	108	394.333	435.333	395.667	437.667
S9606_1177	hsa-miR-27b-5p	NA	786	1025	316	865	820	172	789	1035	319	875	826	174	709	619	714.333	625
S9606_1178	hsa-miR-301b-3p	NA	99	94	17	99	92	45	99	94	17	101	92	45	70	78.667	70	79.333
S9606_1181	hsa-miR-1227-3p	NA	10	11	2	14	9	2	10	11	2	14	9	2	7.667	8.333	7.667	8.333
S9606_1182	hsa-miR-659-3p	NA	3	2	1	4	2	0	3	2	1	4	2	0	2	2	2	2
S9606_2492	hsa-miR-3929	NA	0	0	0	2	0	0	0	0	0	2	0	0	0	0.667	0	0.667
S9606_1184	hsa-miR-6813-5p	NA	1	1	0	1	3	0	1	1	0	1	3	0	0.667	1.333	0.667	1.333
S9606_1185	hsa-miR-1256	NA	1	0	1	4	2	5	1	0	1	4	2	5	0.667	3.667	0.667	3.667
S9606_1188	hsa-miR-4755-3p	NA	0	0	0	0	1	0	0	0	0	0	1	0	0	0.333	0	0.333
S9606_1189	hsa-miR-199a-3p	NA	10947	9995	10419	11818	9683	12551	11872	10677	11186	12744	10342	13674	10453.7	11350.7	11245	12253.3
S9606_2496	hsa-miR-6737-3p	NA	0	0	0	0	1	0	0	0	0	0	1	0	0	0.333	0	0.333
S9606_2497	hsa-miR-125b-1-3p	NA	2957	3172	723	3341	2513	1170	3031	3247	727	3424	2557	1181	2284	2341.33	2335	2387.33
S9606_1192	hsa-miR-30d-3p	NA	23	22	6	48	34	8	23	22	6	48	34	8	17	30	17	30
S9606_1194	hsa-miR-32-3p	NA	0	0	1	2	2	1	0	0	1	2	2	1	0.333	1.667	0.333	1.667
S9606_1193	hsa-miR-1307-5p	NA	116	71	6	2	5	5	117	71	6	2	5	5	64.333	4	64.667	4
S9606_2499	hsa-miR-4435	NA	8	12	5	6	9	5	8	12	5	7	9	5	8.333	6.667	8.333	7
S9606_2500	hsa-miR-6798-3p	NA	0	1	0	0	0	0	0	1	0	0	0	0	0.333	0	0.333	0
S9606_1196	hsa-miR-708-5p	NA	40	27	20	20	15	11	40	27	20	20	15	11	29	15.333	29	15.333
S9606_1201	hsa-miR-2467-3p	NA	0	2	0	0	0	0	0	2	0	0	0	0	0.667	0	0.667	0
S9606_1200	hsa-miR-4466	NA	263	375	49	282	299	105	263	376	49	284	301	105	229	228.667	229.333	230
S9606_2502	hsa-miR-1910-5p	NA	12	19	1	20	10	4	12	19	1	20	10	4	10.667	11.333	10.667	11.333
S9606_2503	hsa-miR-4769-3p	NA	3	1	0	0	2	0	3	1	0	0	2	0	1.333	0.667	1.333	0.667
S9606_1202	hsa-miR-6764-5p	NA	4	1	0	0	0	0	4	1	0	0	0	0	1.667	0	1.667	0
S9606_2505	hsa-miR-181a-3p	NA	786	1045	305	554	571	477	792	1049	307	554	572	480	712	534	716	535.333
S9606_2506	hsa-miR-664a-5p	NA	6	4	0	14	5	2	6	4	0	14	5	2	3.333	7	3.333	7
S9606_1206	hsa-miR-34a-5p	NA	64890	70558	25027	71889	58423	37067	116639	129006	29998	133338	94135	48683	53491.7	55793	91881	92052
S9606_2509	hsa-miR-466	NA	0	0	0	0	0	1	0	0	0	0	0	1	0	0.333	0	0.333
S9606_1208	hsa-miR-335-5p	NA	330	208	120	466	330	162	333	208	120	468	331	162	219.333	319.333	220.333	320.333
S9606_1209	hsa-miR-5588-3p	NA	0	1	0	0	0	0	0	1	0	0	0	0	0.333	0	0.333	0
S9606_1211	hsa-miR-6848-3p	NA	0	0	0	1	0	0	0	0	0	1	0	0	0	0.333	0	0.333
S9606_1213	hsa-miR-5091	NA	0	0	0	0	0	1	0	0	0	0	0	1	0	0.333	0	0.333
S9606_1212	hsa-miR-6769a-5p	NA	0	1	0	0	0	0	0	1	0	0	0	0	0.333	0	0.333	0
S9606_1214	hsa-miR-26a-5p	NA	102544	99953	54070	107452	95792	79433	307456	264880	83951	315568	234031	160235	85522.3	94225.7	218762	236611
S9606_1210	hsa-miR-99b-3p	NA	832	883	200	884	910	338	841	895	201	889	920	342	638.333	710.667	645.667	717
S9606_2513	hsa-miR-16-2-3p	NA	15	32	3	19	17	9	15	32	3	19	17	9	16.667	15	16.667	15
S9606_2515	hsa-miR-1225-5p	NA	2	3	0	0	1	5	2	3	0	0	1	5	1.667	2	1.667	2
S9606_1216	hsa-miR-6819-5p	NA	0	2	0	1	0	0	0	2	0	1	0	0	0.667	0.333	0.667	0.333
S9606_2517	hsa-miR-181a-5p	NA	45186	47262	22250	48755	38641	41885	65797	68694	26483	71029	51354	57704	38232.7	43093.7	53658	60029
S9606_2518	hsa-miR-4662a-3p	NA	0	0	1	0	2	1	0	0	1	0	2	1	0.333	1	0.333	1
S9606_1217	hsa-miR-6747-3p	NA	0	0	0	2	0	1	0	0	0	2	0	1	0	1	0	1
S9606_2519	hsa-miR-4766-3p	NA	0	0	0	0	1	0	0	0	0	0	1	0	0	0.333	0	0.333
S9606_1218	hsa-miR-190a-5p	NA	86	57	35	74	72	35	86	57	35	74	72	35	59.333	60.333	59.333	60.333
S9606_2520	hsa-miR-1245b-3p	NA	0	1	0	0	2	0	0	1	0	0	2	0	0.333	0.667	0.333	0.667
S9606_1219	hsa-miR-7109-5p	NA	0	1	0	0	0	0	0	1	0	0	0	0	0.333	0	0.333	0
S9606_2521	hsa-miR-6749-3p	NA	2	1	0	4	4	1	2	1	0	4	4	1	1	3	1	3
S9606_1221	hsa-miR-4647	NA	0	3	1	0	0	1	0	3	1	0	0	1	1.333	0.333	1.333	0.333
S9606_2523	hsa-miR-5695	NA	0	0	1	0	0	0	0	0	1	0	0	0	0.333	0	0.333	0
S9606_2524	hsa-miR-1299	NA	9	2	4	7	5	2	9	2	4	7	5	2	5	4.667	5	4.667
S9606_2526	hsa-miR-4701-3p	NA	0	0	0	2	1	0	0	0	0	2	1	0	0	1	0	1
S9606_2525	hsa-miR-374c-3p	NA	615	951	1479	9	10	6	618	960	1496	9	10	6	1015	8.333	1024.67	8.333
S9606_1227	hsa-miR-3130-3p	NA	6	5	1	7	1	0	6	5	1	8	1	0	4	2.667	4	3
S9606_2529	hsa-miR-6845-3p	NA	0	0	0	0	1	0	0	0	0	0	1	0	0	0.333	0	0.333
S9606_2530	hsa-miR-320b	NA	81	93	124	1077	87	33	81	93	124	1085	87	33	99.333	399	99.333	401.667
S9606_2531	hsa-miR-505-5p	NA	50	132	19	101	73	46	50	133	19	101	73	46	67	73.333	67.333	73.333
S9606_1229	hsa-miR-122b-5p	NA	1	5	1	1	0	2	1	5	1	1	0	2	2.333	1	2.333	1
S9606_2533	hsa-miR-6781-5p	NA	0	2	0	1	0	0	0	2	0	1	0	0	0.667	0.333	0.667	0.333
S9606_1233	hsa-miR-5583-3p	NA	0	0	0	0	0	1	0	0	0	0	0	1	0	0.333	0	0.333
S9606_2535	hsa-miR-6822-5p	NA	0	1	0	1	0	0	0	1	0	1	0	0	0.333	0.333	0.333	0.333
S9606_1234	hsa-miR-3188	NA	5	9	0	4	4	1	5	9	0	4	4	1	4.667	3	4.667	3
S9606_1235	hsa-let-7a-5p	NA	109933	93446	68133	107848	87807	77106	362466	225730	122647	324476	192458	151917	90504	90920.3	236948	222950
S9606_2537	hsa-miR-192-5p	NA	396	528	134	493	419	299	398	530	134	494	422	302	352.667	403.667	354	406
S9606_1237	hsa-miR-7-5p	NA	9998	10319	71	16303	16069	6387	10745	11084	71	18271	17965	6740	6796	12919.7	7300	14325.3
S9606_2538	hsa-miR-548l	NA	1	0	0	1	3	0	1	0	0	1	3	0	0.333	1.333	0.333	1.333
S9606_2540	hsa-miR-6830-3p	NA	0	2	0	0	2	0	0	2	0	0	2	0	0.667	0.667	0.667	0.667
S9606_1238	hsa-miR-3136-5p	NA	4	2	0	3	3	2	4	2	0	3	3	2	2	2.667	2	2.667
S9606_2542	hsa-miR-6729-3p	NA	1	0	0	0	0	0	1	0	0	0	0	0	0.333	0	0.333	0
S9606_1240	hsa-miR-629-3p	NA	7	3	1	1	3	0	7	3	1	1	3	0	3.667	1.333	3.667	1.333
S9606_2546	hsa-miR-130b-3p	NA	91	107	25	166	111	31	92	108	25	166	112	31	74.333	102.667	75	103
S9606_2547	hsa-let-7c-5p	NA	3847	2836	5386	4443	2146	1906	3954	2894	5581	4572	2175	1940	4023	2831.67	4143	2895.67
S9606_2548	hsa-miR-548z	NA	2	5	0	0	2	1	2	5	0	0	2	1	2.333	1	2.333	1
S9606_2549	hsa-miR-203a-3p	NA	1	4	1	0	0	0	1	4	1	0	0	0	2	0	2	0
S9606_2550	hsa-miR-377-3p	NA	3158	2800	902	5356	4033	1474	3227	2854	909	5564	4137	1497	2286.67	3621	2330	3732.67
S9606_2551	hsa-miR-6783-3p	NA	0	0	0	1	0	1	0	0	0	1	0	1	0	0.667	0	0.667
S9606_1243	hsa-miR-6815-5p	NA	8	1	1	7	4	1	8	1	1	7	4	1	3.333	4	3.333	4
S9606_1244	hsa-miR-6746-5p	NA	7	6	0	4	5	3	7	6	0	4	5	3	4.333	4	4.333	4
S9606_1245	hsa-miR-6772-3p	NA	0	1	0	0	0	1	0	1	0	0	0	1	0.333	0.333	0.333	0.333
S9606_2555	hsa-miR-374c-5p	NA	0	3	3	2	1	0	0	3	3	2	1	0	2	1	2	1
S9606_1247	hsa-miR-130a-5p	NA	18	21	25	22	32	31	18	21	25	22	33	31	21.333	28.333	21.333	28.667
S9606_2556	hsa-miR-199b-3p	NA	10947	9995	10419	11818	9683	12551	11872	10677	11186	12744	10342	13674	10453.7	11350.7	11245	12253.3
S9606_1246	hsa-miR-874-3p	NA	40	46	61	50	37	89	40	46	61	50	37	90	49	58.667	49	59
S9606_2558	hsa-miR-454-3p	NA	1003	598	405	1046	853	938	1013	599	407	1053	855	945	668.667	945.667	673	951
S9606_2561	hsa-miR-1278	NA	1	2	0	2	3	0	1	2	0	2	3	0	1	1.667	1	1.667
S9606_1248	hsa-miR-331-3p	NA	51	50	24	45	45	50	51	50	24	45	45	50	41.667	46.667	41.667	46.667
S9606_1249	hsa-miR-187-3p	NA	11	13	6	16	8	12	11	13	6	16	8	12	10	12	10	12
S9606_2563	hsa-miR-5699-3p	NA	14	3	0	5	7	1	14	3	0	5	7	1	5.667	4.333	5.667	4.333
S9606_1250	hsa-miR-3150a-3p	NA	2	1	0	0	1	0	2	1	0	0	1	0	1	0.333	1	0.333
S9606_2564	hsa-miR-6746-3p	NA	11	10	2	8	22	0	11	10	2	8	22	0	7.667	10	7.667	10
S9606_2565	hsa-miR-6720-3p	NA	3	2	0	4	5	5	3	2	0	4	5	5	1.667	4.667	1.667	4.667
S9606_1251	hsa-miR-4433b-3p	NA	0	0	1	0	0	3	0	0	1	0	0	3	0.333	1	0.333	1
S9606_2566	hsa-miR-874-5p	NA	5	11	6	9	16	15	5	11	6	9	16	15	7.333	13.333	7.333	13.333
S9606_1254	hsa-miR-579-3p	NA	17	8	1	8	13	5	17	8	1	8	13	5	8.667	8.667	8.667	8.667
S9606_1255	hsa-miR-577	NA	1	0	0	1	0	0	1	0	0	1	0	0	0.333	0.333	0.333	0.333
S9606_1256	hsa-miR-382-5p	NA	5306	5844	1483	4693	4988	2224	5523	6129	1504	4854	5157	2270	4211	3968.33	4385.33	4093.67
S9606_1257	hsa-miR-4770	NA	1	0	0	0	0	1	1	0	0	0	0	1	0.333	0.333	0.333	0.333
S9606_2570	hsa-miR-4473	NA	5	2	1	2	3	4	5	2	1	2	3	4	2.667	3	2.667	3
S9606_2569	hsa-miR-1973	NA	2	1	0	1	0	0	2	1	0	1	0	0	1	0.333	1	0.333
S9606_1259	hsa-miR-218-1-3p	NA	1	2	1	1	2	2	1	2	1	1	2	2	1.333	1.667	1.333	1.667
S9606_2573	hsa-miR-3129-3p	NA	2	4	1	1	3	1	2	5	1	1	3	1	2.333	1.667	2.667	1.667
S9606_2574	hsa-miR-6866-5p	NA	0	0	0	0	2	1	0	0	0	0	2	1	0	1	0	1
S9606_1261	hsa-miR-3115	NA	9	5	2	4	5	1	9	5	2	4	5	1	5.333	3.333	5.333	3.333
S9606_1262	hsa-miR-4746-5p	NA	2	2	0	2	0	2	2	2	0	2	0	2	1.333	1.333	1.333	1.333
S9606_2576	hsa-miR-107	NA	13	19	17	14	12	17	13	19	17	14	13	17	16.333	14.333	16.333	14.667
S9606_1263	hsa-miR-5010-3p	NA	0	4	0	2	0	3	0	4	0	2	0	3	1.333	1.667	1.333	1.667
S9606_2577	hsa-miR-5003-5p	NA	0	1	0	0	0	0	0	1	0	0	0	0	0.333	0	0.333	0
S9606_2578	hsa-miR-4804-5p	NA	4	2	0	1	1	0	4	2	0	1	1	0	2	0.667	2	0.667
S9606_1264	hsa-miR-376a-5p	NA	12	3	14	13	10	25	12	3	14	13	10	25	9.667	16	9.667	16
S9606_1265	hsa-miR-188-5p	NA	49	47	9	54	46	10	49	47	9	54	46	10	35	36.667	35	36.667
S9606_2582	hsa-miR-6873-3p	NA	1	0	0	2	3	1	1	0	0	2	3	1	0.333	2	0.333	2
S9606_1267	hsa-miR-495-3p	NA	3667	3891	1470	9437	7035	3087	3774	4015	1483	10096	7382	3161	3009.33	6519.67	3090.67	6879.67
S9606_2585	hsa-miR-4775	NA	162	118	47	199	142	65	162	118	47	199	142	65	109	135.333	109	135.333
S9606_2588	hsa-miR-933	NA	0	0	0	2	0	0	0	0	0	2	0	0	0	0.667	0	0.667
S9606_2589	hsa-miR-7845-5p	NA	0	2	0	0	0	1	0	2	0	0	0	1	0.667	0.333	0.667	0.333
S9606_1270	hsa-miR-4516	NA	127	426	235	80	224	196	128	428	236	80	224	196	262.667	166.667	264	166.667
S9606_1272	hsa-miR-1910-3p	NA	0	9	0	1	0	3	0	9	0	1	0	3	3	1.333	3	1.333
S9606_1274	hsa-miR-152-5p	NA	7	10	5	24	11	8	7	10	5	24	11	8	7.333	14.333	7.333	14.333
S9606_1276	hsa-miR-409-3p	NA	16623	15348	3986	13630	15566	4966	18864	17187	4124	14983	17389	5185	11985.7	11387.3	13391.7	12519
S9606_1275	hsa-miR-204-5p	NA	62	68	34	81	69	46	62	68	34	81	69	46	54.667	65.333	54.667	65.333
S9606_2591	hsa-miR-3940-3p	NA	5	2	1	7	4	5	5	2	1	7	4	5	2.667	5.333	2.667	5.333
S9606_1277	hsa-miR-1249-3p	NA	53	80	32	36	32	25	53	80	32	36	32	25	55	31	55	31
S9606_1278	hsa-miR-4787-3p	NA	16	28	19	18	18	14	16	28	19	18	18	14	21	16.667	21	16.667
S9606_2593	hsa-miR-218-2-3p	NA	1	3	1	0	1	0	1	3	1	0	1	0	1.667	0.333	1.667	0.333
S9606_2597	hsa-miR-519b-5p	NA	1	0	0	0	0	0	1	0	0	0	0	0	0.333	0	0.333	0
S9606_2596	hsa-miR-212-5p	NA	42	81	23	109	82	83	42	81	23	109	82	85	48.667	91.333	48.667	92
S9606_2599	hsa-miR-6796-3p	NA	0	0	1	1	0	0	0	0	1	1	0	0	0.333	0.333	0.333	0.333
S9606_2598	hsa-miR-889-3p	NA	776	695	231	847	1006	353	783	696	232	858	1013	353	567.333	735.333	570.333	741.333
S9606_1284	hsa-miR-183-5p	NA	85	76	18	67	70	38	85	76	18	68	70	39	59.667	58.333	59.667	59
S9606_1285	hsa-miR-544a	NA	29	50	5	42	48	4	29	50	5	42	48	4	28	31.333	28	31.333
S9606_2601	hsa-miR-6732-3p	NA	0	0	1	1	1	0	0	0	1	1	1	0	0.333	0.667	0.333	0.667
S9606_2602	hsa-miR-15a-3p	NA	12	27	0	17	24	3	12	27	0	17	24	3	13	14.667	13	14.667
S9606_1286	hsa-miR-135b-3p	NA	3	3	3	1	4	1	3	3	3	1	4	1	3	2	3	2
S9606_2604	hsa-miR-3614-3p	NA	0	0	0	0	0	1	0	0	0	0	0	1	0	0.333	0	0.333
S9606_1288	hsa-miR-548ai	NA	3	0	0	1	0	1	3	0	0	1	0	1	1	0.667	1	0.667
S9606_1289	hsa-miR-501-3p	NA	115	169	60	203	122	101	115	169	61	205	123	101	114.667	142	115	143
S9606_2605	hsa-miR-574-5p	NA	14883	13507	2864	14389	12837	4135	16650	14837	2928	15978	13961	4297	10418	10453.7	11471.7	11412
S9606_1290	hsa-miR-4695-5p	NA	0	0	0	0	2	0	0	0	0	0	2	0	0	0.667	0	0.667
S9606_1294	hsa-miR-103b	NA	63	256	1974	346	205	47	63	257	1996	346	206	47	764.333	199.333	772	199.667
S9606_2609	hsa-miR-1226-5p	NA	1	7	0	9	4	2	1	7	0	9	4	2	2.667	5	2.667	5
S9606_2611	hsa-miR-4657	NA	3	1	0	0	0	0	3	1	0	0	0	0	1.333	0	1.333	0
S9606_2613	hsa-miR-4767	NA	2	2	0	1	0	1	2	2	0	1	0	1	1.333	0.667	1.333	0.667
S9606_2614	hsa-miR-296-3p	NA	22	32	5	31	25	1	22	32	5	31	25	1	19.667	19	19.667	19
S9606_2615	hsa-miR-655-5p	NA	61	52	15	74	54	14	61	53	15	74	54	14	42.667	47.333	43	47.333
S9606_2617	hsa-miR-6720-5p	NA	33	47	2	46	48	5	33	47	2	46	48	5	27.333	33	27.333	33
S9606_2618	hsa-miR-4423-3p	NA	0	0	1	1	0	1	0	0	1	1	0	1	0.333	0.667	0.333	0.667
S9606_1297	hsa-miR-214-3p	NA	1381	1515	1775	3592	2299	2498	1395	1526	1790	3675	2346	2538	1557	2796.33	1570.33	2853
S9606_1298	hsa-miR-1197	NA	244	280	63	227	283	98	245	280	63	228	283	98	195.667	202.667	196	203
S9606_2620	hsa-miR-519c-5p	NA	1	0	0	0	0	0	1	0	0	0	0	0	0.333	0	0.333	0
S9606_2619	hsa-miR-877-3p	NA	3	1	2	0	2	2	3	1	2	0	2	2	2	1.333	2	1.333
S9606_1301	hsa-miR-21-5p	NA	93536	94506	67730	96049	83310	95186	243629	229729	120354	232776	177340	235808	85257.3	91515	197904	215308
S9606_2623	hsa-miR-27b-3p	NA	18092	20329	6497	20075	16253	4777	20775	23467	6804	23040	18206	4944	14972.7	13701.7	17015.3	15396.7
S9606_1300	hsa-miR-6885-3p	NA	1	1	0	1	0	1	1	1	0	1	0	1	0.667	0.667	0.667	0.667
S9606_1302	hsa-miR-346	NA	1	0	0	0	0	0	1	0	0	0	0	0	0.333	0	0.333	0
S9606_1303	hsa-miR-197-3p	NA	1226	1485	505	1558	1268	820	1235	1506	508	1576	1277	827	1072	1215.33	1083	1226.67
S9606_2625	hsa-miR-487b-5p	NA	23	28	16	39	20	27	23	28	16	39	20	27	22.333	28.667	22.333	28.667
S9606_2627	hsa-miR-326	NA	15	17	12	19	5	23	15	17	12	19	5	23	14.667	15.667	14.667	15.667
S9606_1306	hsa-miR-4786-5p	NA	0	0	0	1	0	0	0	0	0	1	0	0	0	0.333	0	0.333
S9606_1305	hsa-miR-5582-3p	NA	9	7	0	11	7	2	9	7	0	11	7	2	5.333	6.667	5.333	6.667
S9606_1307	hsa-miR-4485-5p	NA	3	4	1	0	4	1	3	4	1	0	4	1	2.667	1.667	2.667	1.667
S9606_2629	hsa-miR-24-2-5p	NA	7	9	3	23	6	10	7	9	3	23	6	10	6.333	13	6.333	13
S9606_2631	hsa-miR-548g-5p	NA	0	0	0	1	0	0	0	0	0	1	0	0	0	0.333	0	0.333
S9606_2630	hsa-miR-1185-1-3p	NA	532	771	196	1849	692	76	535	775	196	1869	696	76	499.667	872.333	502	880.333
S9606_2632	hsa-miR-4800-5p	NA	0	0	0	0	0	2	0	0	0	0	0	2	0	0.667	0	0.667
S9606_1311	hsa-miR-145-5p	NA	2408	2020	2884	1295	2323	1547	2450	2059	2949	1312	2370	1569	2437.33	1721.67	2486	1750.33
S9606_1316	hsa-miR-3935	NA	1	1	0	0	0	0	1	1	0	0	0	0	0.667	0	0.667	0
S9606_2636	hsa-miR-3529-3p	NA	107	75	3967	200	205	102	108	75	4088	202	205	103	1383	169	1423.67	170
S9606_1317	hsa-miR-2355-5p	NA	1	1	0	0	1	0	1	1	0	0	1	0	0.667	0.333	0.667	0.333
S9606_2637	hsa-miR-4661-5p	NA	0	2	0	0	1	1	0	2	0	0	1	1	0.667	0.667	0.667	0.667
S9606_2639	hsa-miR-6817-5p	NA	0	2	0	0	2	0	0	2	0	0	2	0	0.667	0.667	0.667	0.667
S9606_2641	hsa-miR-6754-3p	NA	0	0	0	1	0	0	0	0	0	1	0	0	0	0.333	0	0.333
S9606_2643	hsa-miR-16-5p	NA	42457	49984	16081	53948	44978	29127	60204	73626	17998	81926	63049	35785	36174	42684.3	50609.3	60253.3
S9606_2644	hsa-miR-3159	NA	0	0	0	0	1	0	0	0	0	0	1	0	0	0.333	0	0.333
S9606_1327	hsa-miR-10401-5p	NA	3	0	1	1	1	3	3	0	1	1	1	3	1.333	1.667	1.333	1.667
S9606_2645	hsa-miR-1302	NA	0	0	1	0	1	0	0	0	1	0	1	0	0.333	0.333	0.333	0.333
S9606_1328	hsa-miR-433-3p	NA	3163	3931	595	3831	3516	1190	3245	4043	600	3961	3597	1205	2563	2845.67	2629.33	2921
S9606_2646	hsa-miR-217-5p	NA	2	1	1	3	1	2	2	1	1	3	1	2	1.333	2	1.333	2
S9606_1331	hsa-miR-1293	NA	3	4	0	8	3	0	3	4	0	8	3	0	2.333	3.667	2.333	3.667
S9606_2649	hsa-miR-4723-5p	NA	0	0	0	0	2	0	0	0	0	0	2	0	0	0.667	0	0.667
S9606_2650	hsa-miR-4785	NA	1	0	1	0	0	1	1	0	1	0	0	1	0.667	0.333	0.667	0.333
S9606_2652	hsa-miR-7706	NA	50	46	2	43	34	8	50	49	2	43	34	8	32.667	28.333	33.667	28.333
S9606_1333	hsa-miR-4749-3p	NA	0	2	0	0	0	0	0	2	0	0	0	0	0.667	0	0.667	0
S9606_2653	hsa-miR-4502	NA	0	0	0	0	1	0	0	0	0	0	1	0	0	0.333	0	0.333
S9606_1338	hsa-miR-302d-3p	NA	430	315	158	342	333	254	437	316	160	347	336	259	301	309.667	304.333	314
S9606_1337	hsa-miR-210-3p	NA	118	143	32	121	127	34	118	143	33	121	127	34	97.667	94	98	94
S9606_1340	hsa-miR-3177-3p	NA	82	128	9	103	71	17	82	128	9	103	71	17	73	63.667	73	63.667
S9606_2656	hsa-miR-191-5p	NA	47714	59771	14226	47923	46151	29771	70914	96551	15875	69182	65644	37315	40570.3	41281.7	61113.3	57380.3
S9606_1341	hsa-miR-4687-5p	NA	1	1	0	2	3	1	1	1	0	2	3	1	0.667	2	0.667	2
