# Supplementary material for: Mesenchymal Stem Cell-Derived Exosomes Protect Trabecular Meshwork from Oxidative Stress
Source: Research Square preprint supplement (doi:10.21203/rs.3.rs-234332/v1), 2021-02-19
Supplement: Supplementary file 4 [file 31b798f13d48aa59b7ebd282.xlsx]

## Sheet: Sheet1
	Control	Exo+H2O2	PBS+H2O2
IL-1alpha	3.98572	4.69422	14.0977
	2.57511	8.26851	21.1963
	1.87298	6.83243	12.9944
IL-1beta	1.41616	3.85048	12.8922
	1.0684	5.24152	10.4579
	0.37288	9.7624	12.1967
IL-6	121.114	225.269	1053.5
	122.227	249.776	982.761
	148.963	238.636	1318.06
IL-8	62.75	155.49	487.55
	77.4	117.76	544.9
	102.34	157.08	539.57
MMP-2	156.452	469.154	104.335
	312.803	781.856	156.452
	260.686	521.271	312.803
MMP-3	267.77	351.23	267.39
	242.96	392.58	300.47
	267.77	458.74	308.74
