# Supplementary material for: Mesenchymal Stem Cell-Derived Exosomes Protect Trabecular Meshwork from Oxidative Stress
Source: Research Square preprint supplement (doi:10.21203/rs.3.rs-234332/v1), 2021-02-19
Supplement: Supplementary file 5 [file 6860714b36def23c706222f7.docx]

Supplementary Materials for

**Mesenchymal Stem Cell-Derived Exosomes Protect** **Trabecular Meshwork from** **Oxidative Stress**

Ying-chao Li1,2, Juan Zheng3, Xi-zi Wang3, Xin Wang4, Wen-jing Liu2, and Jian-lu Gao1,4*

1Department of Ophthalmology, Liaocheng People's Hospital, Cheeloo College of Medicine, Shandong University

2Department of Ophthalmology, Taian City Central Hospital

3Joint Laboratory for Translational Medicine Research, Beijing Institute of Genomics, Chinese Academy of Sciences & Liaocheng People’s Hospital

4Department of Ophthalmology, Liaocheng People's Hospital

*Corresponding author. Department of Ophthalmology, Liaocheng People's Hospital, Cheeloo College of Medicine, Shandong University, Liaocheng, Shandong 252000, China. E-mail: drgaojianlu@163.com. Tel: +8618663500588

Table S1. Cell viability of three groups for 6, 12, and 24 hours. (Exo+H2O2 group: hTMCs were pretreated with hBMSC-derived exosomes for 24hours, then exposed to 0.1mM H2O2; PBS+H2O2group: hTMCs were pretreated with PBS for 24hours, then exposed to 0.1mM H2O2; Controlgroup: hTMCs were culture in DMEM-Ham’s F12 for 24hours，then changed for new medium.)

Table S2. Data of the differentially iROS between Exo+H2O2 group and PBS+H2O2 group

Table S3. Data of the differentially mRNA expression of inflammatory factors and MMPs between Exo+H2O2 group and PBS+H2O2 group

Table S4. Data of the differentially protein expression of inflammatory factors and MMPs between Exo+H2O2 group and PBS+H2O2 group

Table S5. List of microRNA expression of Exo group (hTMCs pretreated by hBMSC-derived exosomes and followed by exposure to H2O2) and control group (hTM cells pretreated by PBS and followed by exposure to H2O2)

Table S6. List of LncRNA and mRNA expression of Exo- and control group
