# Supplementary material for: Mesenchymal Stem Cell-Derived Exosomes Protect Trabecular Meshwork from Oxidative Stress
Source: Research Square preprint supplement (doi:10.21203/rs.3.rs-234332/v1), 2021-02-19
Supplement: Supplementary file 6 [file cad96356bba4089bc22c88f4.xlsx]

## Sheet: Sheet1
	Control	Exo+H2O2	PBS+H2O2
	131	375	841									1210
	198	475	1561
	261	552	1210
